# Supplementary material for: Spatial epidemiology of gestational age and birth weight in Switzerland: census-based linkage study
Source: PubMed Central journal article supplement (PMC6830696; doi:10.1136/bmjopen-2018-027834), 2019-10-30

**Supplementary Table S1. Number of live births, mean gestational age and mean birth weight by maternal nationality in the eligible population (N = 315'177); 276 days correspond to 39<sup>3/7</sup> weeks.**

| Nationality               | N              | Gestational age (days)<br>Mean (SD) | Birth weight (g)<br>Mean (SD) |            |
|---------------------------|----------------|-------------------------------------|-------------------------------|------------|
| Switzerland               | 194,570        | 276 (12)                            | 3322 (511)                    |            |
| <b>Southern Europe</b>    |                |                                     |                               |            |
| Andorra                   | 1              | 279 (-)                             | 3080 (-)                      |            |
| Italy                     | 8337           | 275 (12)                            | 3271 (496)                    |            |
| Malta                     | 13             | 273 (8)                             | 3188 (427)                    |            |
| Portugal                  | 12,368         | 276 (12)                            | 3235 (493)                    |            |
| San Marino                | 2              | 274 (1.4)                           | 3485 (120)                    |            |
| Spain                     | 2864           | 276 (12)                            | 3263 (488)                    |            |
| <b>Western Europe</b>     |                |                                     |                               |            |
| Austria                   | 1555           | 275 (14)                            | 3328 (528)                    |            |
| Belgium                   | 583            | 276 (12)                            | 3357 (482)                    |            |
| Germany                   | 16,736         | 276 (13)                            | 3369 (517)                    |            |
| France                    | 6173           | 276 (12)                            | 3294 (505)                    |            |
| Lichtenstein              | 100            | 275 (11)                            | 3369 (488)                    |            |
| Luxembourg                | 55             | 276 (19)                            | 3396 (636)                    |            |
| Netherlands               | 803            | 276 (12)                            | 3377 (529)                    |            |
| <b>Northern Europe</b>    |                |                                     |                               |            |
| Denmark                   | 271            | 276 (13)                            | 3383 (511)                    |            |
| Estonia                   | 81             | 279 (7)                             | 3601 (466)                    |            |
| Finland                   | 312            | 276 (11)                            | 3465 (523)                    |            |
| Ireland                   | 212            | 276 (16)                            | 3446 (548)                    |            |
| Iceland                   | 31             | 272 (25)                            | 3180 (775)                    |            |
| Latvia                    | 187            | 279 (9)                             | 3493 (434)                    |            |
| Lithuania                 | 152            | 277 (13)                            | 3450 (535)                    |            |
| Norway                    | 110            | 275 (11)                            | 3390 (525)                    |            |
| Sweden                    | 571            | 276 (12)                            | 3422 (470)                    |            |
| UK                        | 1768           | 276 (13)                            | 3397 (513)                    |            |
| <b>Eastern Europe</b>     |                |                                     |                               |            |
| Czech Republic            | 623            | 275 (12)                            | 3339 (499)                    |            |
| Hungary                   | 913            | 275 (13)                            | 3341 (512)                    |            |
| Poland                    | 1778           | 276 (12)                            | 3399 (497)                    |            |
| Slovakia                  | 1068           | 276 (12)                            | 3348 (509)                    |            |
| Albania                   | 209            | 276 (12)                            | 3406 (476)                    |            |
| Bosnia & Herzegovina      | 1952           | 276 (12)                            | 3466 (492)                    |            |
| Croatia                   | 1582           | 276 (12)                            | 3448 (540)                    |            |
| Kosovo                    | 10,278         | 276 (13)                            | 3421 (530)                    |            |
| Macedonia                 | 5842           | 276 (13)                            | 3392 (514)                    |            |
| Montenegro                | 212            | 276 (10)                            | 3416 (466)                    |            |
| Serbia                    | 5195           | 276 (13)                            | 3400 (536)                    |            |
| Serbia & Montenegro       | 10             | 277 (8)                             | 3637 (250)                    |            |
| Slovenia                  | 163            | 275 (15)                            | 3366 (589)                    |            |
| Cyprus                    | 15             | 278 (8)                             | 3411 (525)                    |            |
| Bulgaria                  | 406            | 273 (15)                            | 3291 (559)                    |            |
| Greece                    | 375            | 274 (13)                            | 3317 (516)                    |            |
| Romania                   | 971            | 274 (14)                            | 3284 (537)                    |            |
| Turkey                    | 4441           | 275 (13)                            | 3347 (523)                    |            |
| Belarus                   | 172            | 277 (13)                            | 3385 (508)                    |            |
| Moldova                   | 135            | 276 (10)                            | 3496 (515)                    |            |
| Russia                    | 1567           | 277 (12)                            | 3427 (513)                    |            |
| Ukraine                   | 855            | 277 (11)                            | 3412 (473)                    |            |
| <b>Other (non-Europe)</b> |                |                                     |                               |            |
| 6 most numerous:          | Eritrea        | 2600                                | 279 (14)                      | 3380 (528) |
|                           | Brazil         | 2381                                | 274 (12)                      | 3312 (498) |
|                           | Sri Lanka      | 1391                                | 273 (14)                      | 3158 (553) |
|                           | USA            | 1291                                | 276 (14)                      | 3378 (532) |
|                           | China          | 1293                                | 276 (13)                      | 3425 (541) |
|                           | Morocco        | 1159                                | 276 (14)                      | 3378 (536) |
|                           | ...            |                                     |                               |            |
| <b>Total</b>              | <b>315,177</b> | <b>276 (12)</b>                     | <b>3328 (515)</b>             |            |

**Supplementary Table S2. Comparison of results from fully adjusted model (model 3) accounting and not accounting for spatial autocorrelation. Based on complete-case population (N = 81,968).**

|                                       | Accounting for spatial autocorrelation                     |                                                        | Not accounting for spatial autocorrelation                 |                                                        |
|---------------------------------------|------------------------------------------------------------|--------------------------------------------------------|------------------------------------------------------------|--------------------------------------------------------|
|                                       | Gestational age (days)<br>Absolute differences<br>(95% CI) | Birth weight (g) *<br>Relative differences<br>(95% CI) | Gestational age (days)<br>Absolute differences<br>(95% CI) | Birth weight (g) *<br>Relative differences<br>(95% CI) |
| Intercept                             | 277.9 (277.6 to 278.1)                                     | 3293 (3163 to 3427)                                    | 277.9 (277.7 to 278.2)                                     | 3298 (3180 to 3420) <sup>§</sup>                       |
| <b>Sex</b>                            |                                                            |                                                        |                                                            |                                                        |
| <sup>¶</sup> Female                   | 0                                                          |                                                        | 0                                                          | 1                                                      |
| Male                                  | -0.62 (-0.78, -0.46)                                       | 1.048 (1.046, 1.049)                                   | -0.63 (-0.79, -0.47)                                       | 1.048 (1.046, 1.049)                                   |
| <b>Birth rank</b>                     |                                                            |                                                        |                                                            |                                                        |
| 1 <sup>¶</sup>                        | 0                                                          |                                                        | 0                                                          | 1                                                      |
| 2                                     | -0.34 (-0.52, -0.17)                                       | 1.039 (1.037, 1.041)                                   | -0.34 (-0.52, -0.16)                                       | 1.039 (1.037, 1.041)                                   |
| 3                                     | -0.17 (-0.45, 0.10)                                        | 1.054 (1.051, 1.056)                                   | -0.16 (-0.44, 0.11)                                        | 1.054 (1.051, 1.057)                                   |
| ≥ 4                                   | 0.23 (-0.26, 0.71)                                         | 1.065 (1.059, 1.070)                                   | 0.24 (-0.25, 0.72)                                         | 1.065 (1.059, 1.070)                                   |
| <b>Maternal age (yrs)<sup>‡</sup></b> |                                                            |                                                        |                                                            |                                                        |
| ≥ 20-30 <sup>¶</sup>                  | 0                                                          |                                                        | 0                                                          | 1                                                      |
| ≥ 30-40 yrs (per 5 yrs)               | -0.92 (-1.06, -0.77)                                       | 0.998 (0.996, 1.000)                                   | -0.93 (-1.07, -0.78)                                       | 0.998 (0.997, 1.000)                                   |
| ≥ 40 yrs (per 5 yrs)                  | -3.48 (-4.30, -2.66)                                       | 0.998 (0.990, 1.006)                                   | -3.46 (-4.29, -2.63)                                       | 0.998 (0.990, 1.006)                                   |
| <b>Civil status<sup>¶</sup></b>       |                                                            |                                                        |                                                            |                                                        |
| Married <sup>¶</sup>                  | 0                                                          |                                                        | 0                                                          | 1                                                      |
| Not married                           | 0.15 (-0.08, 0.38)                                         | 0.993 (0.990, 0.995)                                   | 0.15 (-0.08, 0.38)                                         | 0.993 (0.990, 0.995)                                   |
| <b>Nationality mother</b>             |                                                            |                                                        |                                                            |                                                        |
| Switzerland <sup>¶</sup>              | 0                                                          |                                                        | 0                                                          | 1                                                      |
| S Europe                              | 0.38 (0.00, 0.77)                                          | 0.995 (0.992, 0.999)                                   | 0.39 (0.00, 0.78)                                          | 0.995 (0.991, 0.999)                                   |
| W Europe                              | -0.08 (-0.42, 0.25)                                        | 1.007 (1.003, 1.010)                                   | -0.08 (-0.43, 0.26)                                        | 1.007 (1.004, 1.011)                                   |
| N Europe                              | 0.30 (-0.56, 1.17)                                         | 1.022 (1.013, 1.031)                                   | 0.30 (-0.57, 1.17)                                         | 1.022 (1.013, 1.031)                                   |
| E Europe                              | 0.33 (-0.01, 0.67)                                         | 1.017 (1.013, 1.021)                                   | 0.33 (-0.01, 0.68)                                         | 1.017 (1.014, 1.021)                                   |
| Other                                 | -0.66 (-1.03, -0.29)                                       | 1.012 (1.008, 1.015)                                   | -0.67 (-1.05, -0.30)                                       | 1.012 (1.008, 1.016)                                   |
| <b>Nationality father</b>             |                                                            |                                                        |                                                            |                                                        |
| Switzerland <sup>¶</sup>              | 0                                                          |                                                        | 0                                                          | 1                                                      |
| S Europe                              | -0.28 (-0.61, 0.06)                                        | 0.992 (0.989, 0.996)                                   | -0.28 (-0.62, 0.06)                                        | 0.993 (0.989, 0.996)                                   |
| W Europe                              | 0.30 (-0.03, 0.64)                                         | 1.006 (1.002, 1.009)                                   | 0.30 (-0.04, 0.63)                                         | 1.006 (1.003, 1.010)                                   |
| N Europe                              | -0.21 (-1.06, 0.63)                                        | 1.011 (1.002, 1.019)                                   | -0.24 (-1.09, 0.62)                                        | 1.011 (1.003, 1.020)                                   |
| E Europe                              | -0.02 (-0.38, 0.35)                                        | 1.011 (1.007, 1.015)                                   | -0.01 (-0.38, 0.36)                                        | 1.011 (1.008, 1.015)                                   |
| Other                                 | 0.49 (0.06, 0.91)                                          | 0.991 (0.987, 0.996)                                   | 0.48 (0.05, 0.90)                                          | 0.992 (0.987, 0.996)                                   |
| <b>Education mother</b>               |                                                            |                                                        |                                                            |                                                        |
| Tertiary <sup>¶</sup>                 |                                                            |                                                        | 0                                                          | 1                                                      |
| Secondary                             | -0.56 (-0.75, -0.37)                                       | 0.997 (0.995, 0.999)                                   | -0.55 (-0.74, -0.36)                                       | 0.996 (0.995, 0.998)                                   |
| Compulsory                            | -0.92 (-1.23, -0.60)                                       | 0.993 (0.990, 0.997)                                   | -0.90 (-1.22, -0.58)                                       | 0.993 (0.990, 0.996)                                   |
| <b>Education father</b>               |                                                            |                                                        |                                                            |                                                        |
| Tertiary <sup>¶</sup>                 |                                                            |                                                        | 0                                                          | 1                                                      |
| Secondary                             | -0.16 (-0.35, 0.03)                                        | 0.997 (0.995, 0.999)                                   | -0.16 (-0.35, 0.03)                                        | 0.996 (0.994, 0.998)                                   |
| Compulsory                            | -0.25 (-0.57, 0.07)                                        | 0.997 (0.994, 1.001)                                   | -0.25 (-0.58, 0.07)                                        | 0.997 (0.994, 1.000)                                   |
| <b>Altitude (m)</b>                   |                                                            |                                                        |                                                            |                                                        |
| 500 <sup>¶</sup>                      | 0                                                          |                                                        | 0                                                          | 1                                                      |
| per 500 m increase                    | -0.05 (-0.33, 0.24)                                        | 0.991 (0.987, 0.994)                                   | 0.03 (-0.24, 0.30)                                         | 0.989 (0.987, 0.992)                                   |
| <b>Urbanization</b>                   |                                                            |                                                        |                                                            |                                                        |
| Urban <sup>¶</sup>                    | 0                                                          |                                                        | 0                                                          | 1                                                      |
| Peri-urban                            | -0.54 (-0.75, -0.33)                                       | 1.001 (0.998, 1.004)                                   | -0.59 (-0.82, -0.36)                                       | 1.003 (1.000, 1.005)                                   |
| Rural                                 | -0.25 (-0.50, 0.00)                                        | 1.003 (0.999, 1.006)                                   | -0.29 (-0.55, -0.02)                                       | 1.003 (1.001, 1.006)                                   |
| <b>Language region</b>                |                                                            |                                                        |                                                            |                                                        |
| German <sup>¶</sup>                   | 0                                                          |                                                        | 0                                                          | 1                                                      |
| French                                | -0.33 (-0.75, 0.09)                                        | 0.991 (0.983, 0.998)                                   | -0.66 (-0.88, -0.44)                                       | 0.988 (0.985, 0.990)                                   |
| Italian                               | -1.10 (-1.50, -0.70)                                       | 0.984 (0.978, 0.989)                                   | -1.11 (-1.55, -0.68)                                       | 0.983 (0.979, 0.987)                                   |

\*Birth weight was modelled on a log scale, which results in multiplicative effects. The model for birth weight was additionally adjusted for gestational age by a cubic spline function with knots at weeks 25, 30 and 35.

<sup>§</sup> In the model for BW, the intercept corresponds to an estimated mean birth weight (g) for a singleton girl born at gestational age 40 weeks as the first child (rank 1) in a German-speaking, urban region of elevation 500 m, whose mother is 20-30 years old at birth and married, and both parents have Swiss nationality and tertiary education.

<sup>¶</sup> Reference category

<sup>‡</sup> Age modelled by a piece-wise linear function: constant at reference range ≥20-30, and separate slopes for age <20, ≥30-40, and ≥40. For ages ≥40, the total estimated effect is hence addition of 10-year effect in age group ≥30-40 plus the corresponding effect in age-group ≥40.

<sup>†</sup> Percentage of regional variance explained by model predictors, i.e. percent reduction in variance of random effects ( $\sigma^2$ ) when compared to model with no predictors (model 0).

**Supplementary Table S3. Comparison of results from model (model 3) for birth weight, adjusted and not adjusted for gestational age.**

|                                     | Birth weight - Model 3 without Gestational Age |                          | Birth weight - Model 3 with Gestational Age* |                                  |
|-------------------------------------|------------------------------------------------|--------------------------|----------------------------------------------|----------------------------------|
|                                     | Relative differences (95% CI)                  |                          |                                              |                                  |
|                                     | Eligible population                            | Complete case population | Eligible population                          | Complete case population         |
| <b>Intercept</b>                    | 3188 (3181 to 3195)                            | 3209 (3196 to 3222)      | 3278 (3218 to 3339) <sup>§</sup>             | 3298 (3180 to 3420) <sup>§</sup> |
| <b>Sex</b>                          |                                                |                          |                                              |                                  |
| <sup>¶</sup> Female                 | 1                                              | 1                        | 1                                            | 1                                |
| Male                                | 1.04 (1.038, 1.041)                            | 1.041 (1.039, 1.044)     | 1.045 (1.044 to 1.046)                       | 1.048 (1.046, 1.049)             |
| <b>Rank</b>                         |                                                |                          |                                              |                                  |
| 1 <sup>¶</sup>                      | 1                                              | 1                        | 1                                            | 1                                |
| 2                                   | 1.039 (1.038, 1.041)                           | 1.041 (1.038, 1.044)     | 1.038 (1.037, 1.039)                         | 1.039 (1.037, 1.041)             |
| 3                                   | 1.052 (1.049, 1.054)                           | 1.058 (1.054, 1.063)     | 1.050 (1.048, 1.051)                         | 1.054 (1.051, 1.057)             |
| ≥ 4                                 | 1.060 (1.056, 1.064)                           | 1.071 (1.063, 1.079)     | 1.058 (1.056, 1.061)                         | 1.065 (1.059, 1.070)             |
| <b>Age mother (yrs)<sup>‡</sup></b> |                                                |                          |                                              |                                  |
| < 20yrs (per 5 yrs decr.)           | 0.956 (0.935, 0.978)                           | -                        | 1.002 (0.987, 1.017)                         | -                                |
| ≥ 20-30 yrs <sup>¶</sup>            | 1                                              | 1                        | 1                                            | 1                                |
| ≥ 30-40 yrs (per 5 yrs)             | 0.991 (0.990, 0.992)                           | 0.990 (0.988, 0.993)     | 1.000 (1.000, 1.001)                         | 0.998 (0.997, 1.000)             |
| ≥ 40 yrs (per 5 yrs)                | 0.973 (0.967, 0.979)                           | 0.967 (0.955, 0.979)     | 0.998 (0.994, 1.003)                         | 0.998 (0.990, 1.006)             |
| <b>Civil status<sup>§</sup></b>     |                                                |                          |                                              |                                  |
| Married <sup>¶</sup>                | 1                                              | 1                        | 1                                            | 1                                |
| Not married                         | 0.989 (0.987, 0.990)                           | 0.992 (0.989, 0.996)     | 0.990 (0.989, 0.991)                         | 0.993 (0.99, 0.995)              |
| <b>Nationality mother</b>           |                                                |                          |                                              |                                  |
| Switzerland <sup>¶</sup>            | 1                                              | 1                        | 1                                            | 1                                |
| S Europe                            | 0.996 (0.993, 0.999)                           | 0.999 (0.993, 1.005)     | 0.994 (0.992, 0.996)                         | 0.995 (0.991, 0.999)             |
| W Europe                            | 1.010 (1.007, 1.013)                           | 1.006 (1.001, 1.011)     | 1.008 (1.006, 1.010)                         | 1.007 (1.004, 1.011)             |
| N Europe                            | 1.027 (1.020, 1.034)                           | 1.024 (1.010, 1.037)     | 1.025 (1.020, 1.029)                         | 1.022 (1.013, 1.031)             |
| E Europe                            | 1.014 (1.011, 1.016)                           | 1.020 (1.015, 1.026)     | 1.013 (1.011, 1.014)                         | 1.017 (1.014, 1.021)             |
| Other                               | 1.003 (1.000, 1.006)                           | 1.005 (0.999, 1.010)     | 1.007 (1.005, 1.008)                         | 1.012 (1.008, 1.016)             |
| <b>Nationality father</b>           |                                                |                          |                                              |                                  |
| Switzerland <sup>¶</sup>            | 1                                              | 1                        | 1                                            | 1                                |
| S Europe                            | 0.988 (0.985, 0.991)                           | 0.991 (0.986, 0.996)     | 0.991 (0.990, 0.993)                         | 0.993 (0.989, 0.996)             |
| W Europe                            | 1.008 (1.005, 1.011)                           | 1.009 (1.004, 1.014)     | 1.008 (1.006, 1.009)                         | 1.006 (1.003, 1.010)             |
| N Europe                            | 1.017 (1.010, 1.024)                           | 1.007 (0.994, 1.019)     | 1.013 (1.009, 1.017)                         | 1.011 (1.003, 1.020)             |
| E Europe                            | 1.003 (1.000, 1.006)                           | 1.010 (1.004, 1.015)     | 1.009 (1.007, 1.010)                         | 1.011 (1.008, 1.015)             |
| Other                               | 0.990 (0.987, 0.993)                           | 0.997 (0.990, 1.003)     | 0.992 (0.991, 0.994)                         | 0.992 (0.987, 0.996)             |
| missing                             | 0.933 (0.928, 0.938)                           | -                        | 0.989 (0.985, 0.992)                         | -                                |
| <b>Education mother</b>             |                                                |                          |                                              |                                  |
| Tertiary <sup>¶</sup>               | -                                              | 1                        | -                                            | 1                                |
| Secondary                           | -                                              | 0.992 (0.989, 0.995)     | -                                            | 0.996 (0.995, 0.998)             |
| Compulsory                          | -                                              | 0.984 (0.979, 0.989)     | -                                            | 0.993 (0.990, 0.996)             |
| <b>Education father</b>             |                                                |                          |                                              |                                  |
| Tertiary <sup>¶</sup>               | -                                              | 1                        | -                                            | 1                                |
| Secondary                           | -                                              | 0.995 (0.992, 0.997)     | -                                            | 0.996 (0.994, 0.998)             |
| Compulsory                          | -                                              | 0.995 (0.990, 1.000)     | -                                            | 0.997 (0.994, 1.000)             |
| <b>Altitude (m)</b>                 |                                                |                          |                                              |                                  |
| 500 m <sup>¶</sup>                  | 1                                              | 1                        | 1                                            | 1                                |
| per 500 m increase                  | 0.990 (0.988, 0.992)                           | 0.989 (0.985, 0.993)     | 0.989 (0.988, 0.991)                         | 0.989 (0.987, 0.992)             |
| <b>Urbanization</b>                 |                                                |                          |                                              |                                  |
| Urban <sup>¶</sup>                  | 1                                              | 1                        | 1                                            | 1                                |
| Peri-urban                          | 0.998 (0.996, 1.000)                           | 0.998 (0.995, 1.002)     | 1.001 (1.000, 1.002)                         | 1.003 (1.000, 1.005)             |
| Rural                               | 0.999 (0.996, 1.001)                           | 1.001 (0.997, 1.005)     | 1.000 (0.998, 1.001)                         | 1.003 (1.001, 1.006)             |
| <b>Language region</b>              |                                                |                          |                                              |                                  |
| <sup>¶</sup> German <sup>¶</sup>    | 1                                              | 1                        | 1                                            | 1                                |
| French                              | 0.985 (0.983, 0.987)                           | 0.983 (0.980, 0.986)     | 0.989 (0.987, 0.990)                         | 0.988 (0.985, 0.990)             |
| Italian                             | 0.977 (0.973, 0.981)                           | 0.976 (0.970, 0.982)     | 0.982 (0.980, 0.985)                         | 0.983 (0.979, 0.987)             |
| <b>% variation explained</b>        |                                                |                          |                                              |                                  |
| Model 3                             | 77%                                            | 76%                      | 87%                                          | 88%                              |
| Model 2                             | 25%                                            | 27%                      | 52%                                          | 56%                              |
| Model 1                             | 2%                                             | 5%                       | 31%                                          | 37%                              |

\*Birth weight was modelled on a log scale, which results in multiplicative effects.

<sup>¶</sup> Reference category

<sup>‡</sup> Age modelled by a piece-wise linear function: constant at reference range ≥20-30, and separate slopes for age <20, ≥30-40, and ≥40. For ages ≥40, the total estimated effect is hence addition of 10-year effect in age group ≥30-40 plus the corresponding effect in age-group ≥40.

<sup>†</sup> Percentage of regional variance explained by model predictors, i.e. percent reduction in variance of random effects ( $\sigma^2$ ) when compared to model with no predictors (model 0).

**Supplementary Table S4. Comparison of results from fully adjusted model without and with additionally including Swiss index of socio-economic position (SEP). Based on eligible population (N = 315,177); 277 days correspond to 39<sup>4/7</sup> weeks.**

|                                     | Model 3 without SEP                                        |                                                        | Model 3 with SEP                                           |                                                        |
|-------------------------------------|------------------------------------------------------------|--------------------------------------------------------|------------------------------------------------------------|--------------------------------------------------------|
|                                     | Gestational age (days)<br>Absolute differences<br>(95% CI) | Birth weight (g) *<br>Relative differences<br>(95% CI) | Gestational age (days)<br>Absolute differences<br>(95% CI) | Birth weight (g) *<br>Relative differences<br>(95% CI) |
| <b>Intercept</b>                    | 277.3 (277.2 to 277.5)                                     | 3278 (3218 to 3339) <sup>&amp;</sup>                   | 277.3 (277.2 to 277.5)                                     | 3278 (3218 to 3339) <sup>&amp;</sup>                   |
| <b>Sex</b>                          |                                                            |                                                        |                                                            |                                                        |
| <sup>¶</sup> Female                 | 0                                                          | 1                                                      | 0                                                          | 1                                                      |
| Male                                | -0.56 (-0.65, -0.48)                                       | 1.045 (1.044 to 1.046)                                 | -0.56 (-0.65, -0.48)                                       | 1.045 (1.044 to 1.046)                                 |
| <b>Birth rank</b>                   |                                                            |                                                        |                                                            |                                                        |
| 1 <sup>¶</sup>                      | 0                                                          | 1                                                      | 0                                                          | 1                                                      |
| 2                                   | -0.39 (-0.49, -0.29)                                       | 1.038 (1.037, 1.039)                                   | -0.39 (-0.49, -0.29)                                       | 1.038 (1.037, 1.039)                                   |
| 3                                   | -0.37 (-0.52, -0.22)                                       | 1.050 (1.048, 1.051)                                   | -0.37 (-0.52, -0.22)                                       | 1.050 (1.048, 1.051)                                   |
| ≥ 4                                 | -0.24 (-0.50, 0.02)                                        | 1.058 (1.056, 1.061)                                   | -0.24 (-0.49, 0.02)                                        | 1.058 (1.056, 1.061)                                   |
| <b>Age mother (yrs)<sup>‡</sup></b> |                                                            |                                                        |                                                            |                                                        |
| < 20 (per 5 yrs decr.)              | -4.10 (-5.59, -2.61)                                       | 1.002 (0.987, 1.017)                                   | -4.10 (-5.59, -2.61)                                       | 1.002 (0.987, 1.017)                                   |
| 20 - <30 <sup>¶</sup>               | 0                                                          | 1                                                      | 0                                                          | 1                                                      |
| ≥ 30-40 (per 5 yrs)                 | -0.99 (-1.06, -0.91)                                       | 1.000 (1.000, 1.001)                                   | -0.99 (-1.07, -0.92)                                       | 1.000 (1.000, 1.001)                                   |
| ≥ 40 (per 5 yrs)                    | -2.93 (-3.36, -2.50)                                       | 0.998 (0.994, 1.003)                                   | -2.92 (-3.35, -2.50)                                       | 0.998 (0.994, 1.003)                                   |
| <b>Civil status<sup>§</sup></b>     |                                                            |                                                        |                                                            |                                                        |
| Married                             | 0                                                          | 1                                                      | 0                                                          | 1                                                      |
| Not married                         | -0.01 (-0.13, 0.10)                                        | 0.990 (0.989, 0.991)                                   | -0.01 (-0.13, 0.10)                                        | 0.990 (0.989, 0.991)                                   |
| <b>Nationality mother</b>           |                                                            |                                                        |                                                            |                                                        |
| Switzerland <sup>¶</sup>            | 0                                                          | 1                                                      | 0                                                          | 1                                                      |
| S Europe                            | 0.20 (-0.01, 0.40)                                         | 0.994 (0.992, 0.996)                                   | 0.20 (0.00, 0.41)                                          | 0.994 (0.992, 0.996)                                   |
| W Europe                            | 0.20 (0.02, 0.38)                                          | 1.008 (1.006, 1.010)                                   | 0.20 (0.02, 0.37)                                          | 1.008 (1.006, 1.010)                                   |
| N Europe                            | 0.37 (-0.07, 0.81)                                         | 1.025 (1.020, 1.029)                                   | 0.36 (-0.08, 0.80)                                         | 1.025 (1.020, 1.029)                                   |
| E Europe                            | 0.21 (0.04, 0.38)                                          | 1.013 (1.011, 1.014)                                   | 0.22 (0.05, 0.39)                                          | 1.013 (1.011, 1.015)                                   |
| Other                               | -0.32 (-0.49, -0.14)                                       | 1.007 (1.005, 1.008)                                   | -0.31 (-0.48, -0.14)                                       | 1.007 (1.005, 1.008)                                   |
| <b>Nationality father</b>           |                                                            |                                                        |                                                            |                                                        |
| Switzerland <sup>¶</sup>            | 0                                                          | 1                                                      | 0                                                          | 1                                                      |
| S Europe                            | -0.46 (-0.64, -0.28)                                       | 0.991 (0.990, 0.993)                                   | -0.45 (-0.63, -0.27)                                       | 0.992 (0.99, 0.993)                                    |
| W Europe                            | 0.07 (-0.11, 0.25)                                         | 1.008 (1.006, 1.009)                                   | 0.07 (-0.11, 0.25)                                         | 1.008 (1.006, 1.009)                                   |
| N Europe                            | 0.51 (0.08, 0.94)                                          | 1.013 (1.009, 1.017)                                   | 0.50 (0.07, 0.93)                                          | 1.013 (1.009, 1.017)                                   |
| E Europe                            | -0.46 (-0.64, -0.28)                                       | 1.009 (1.007, 1.010)                                   | -0.45 (-0.63, -0.27)                                       | 1.009 (1.007, 1.011)                                   |
| Other                               | -0.02 (-0.22, 0.18)                                        | 0.992 (0.991, 0.994)                                   | -0.01 (-0.21, 0.19)                                        | 0.993 (0.991, 0.995)                                   |
| missing                             | -3.87 (-4.24, -3.50)                                       | 0.989 (0.985, 0.992)                                   | -3.86 (-4.23, -3.49)                                       | 0.989 (0.985, 0.993)                                   |
| <b>SEP index</b>                    |                                                            |                                                        |                                                            |                                                        |
| 1st quintile                        | -                                                          | -                                                      | -0.08 (-0.25, 0.08)                                        | 0.997 (0.996, 0.999)                                   |
| 2nd quintile                        | -                                                          | -                                                      | -0.09 (-0.24, 0.06)                                        | 0.998 (0.997, 1.000)                                   |
| 3rd quintile                        | -                                                          | -                                                      | -0.02 (-0.17, 0.13)                                        | 0.998 (0.997, 0.999)                                   |
| 4th quintile                        | -                                                          | -                                                      | 0.02 (-0.12, 0.17)                                         | 1.000 (0.999, 1.002)                                   |
| 5th quintile <sup>¶</sup>           | -                                                          | -                                                      | 0                                                          | 1                                                      |
| <b>Altitude (m)</b>                 |                                                            |                                                        |                                                            |                                                        |
| 500 <sup>¶</sup>                    | 0                                                          | 1                                                      | 0                                                          | 1                                                      |
| per 500 m increase                  | 0.07 (-0.09, 0.23)                                         | 0.989 (0.988, 0.991)                                   | 0.08 (-0.08, 0.23)                                         | 0.989 (0.988, 0.991)                                   |
| <b>Urbanization</b>                 |                                                            |                                                        |                                                            |                                                        |
| Urban <sup>¶</sup>                  | 0                                                          | 1                                                      | 0                                                          | 1                                                      |
| Peri-urban                          | -0.43 (-0.57, -0.28)                                       | 1.001 (1.000, 1.002)                                   | -0.43 (-0.57, -0.28)                                       | 1.001 (1.000, 1.002)                                   |
| Rural                               | -0.15 (-0.32, 0.02)                                        | 1.000 (0.998, 1.001)                                   | -0.13 (-0.30, 0.04)                                        | 1.001 (0.999, 1.002)                                   |
| <b>Language region</b>              |                                                            |                                                        |                                                            |                                                        |
| German <sup>¶</sup>                 | 0                                                          | 1                                                      | 0                                                          | 1                                                      |
| French                              | -0.62 (-0.77, -0.47)                                       | 0.989 (0.987, 0.990)                                   | -0.61 (-0.76, -0.46)                                       | 0.989 (0.987, 0.990)                                   |
| Italian                             | -0.94 (-1.26, -0.63)                                       | 0.982 (0.980, 0.985)                                   | -0.93 (-1.24, -0.61)                                       | 0.982 (0.980, 0.985)                                   |
| <b>% variation explained</b>        |                                                            |                                                        |                                                            |                                                        |
| Full model                          | 31%                                                        | 87%                                                    | 31%                                                        | 88%                                                    |
| Model without Lang. region          | 14%                                                        | 66%                                                    | 15%                                                        | 68%                                                    |

\*Birth weight was modelled on a log scale, which results in multiplicative effects. The model for birth weight was additionally adjusted for gestational age by a cubic spline function with knots at weeks 25, 30 and 35.

<sup>&</sup> In the model for BW, the intercept corresponds to an estimated mean birth weight (g) for a singleton girl born at gestational age 40 weeks as the first child (rank 1) in a German-speaking, urban region of elevation 500m, whose mother is 20-30 years old at birth and married, and both parents have Swiss nationality and tertiary education.

<sup>¶</sup> Reference category

<sup>‡</sup> Age modelled by a piece-wise linear function: constant at reference range ≥20-30, and separate slopes for age <20, ≥30-40, and ≥40.

<sup>§</sup> Married or in registered partnership / Not married: Single, widow, divorced or in dissolved partnership

<sup>†</sup> Percentage of regional variance explained by model predictors, i.e. percent reduction in variance of random effects ( $\sigma^2$ ) when compared to model with no predictors (model 0).

**Supplementary Figure S1. Selection of eligible and complete case study populations among live births in Switzerland 2011 to 2014.**

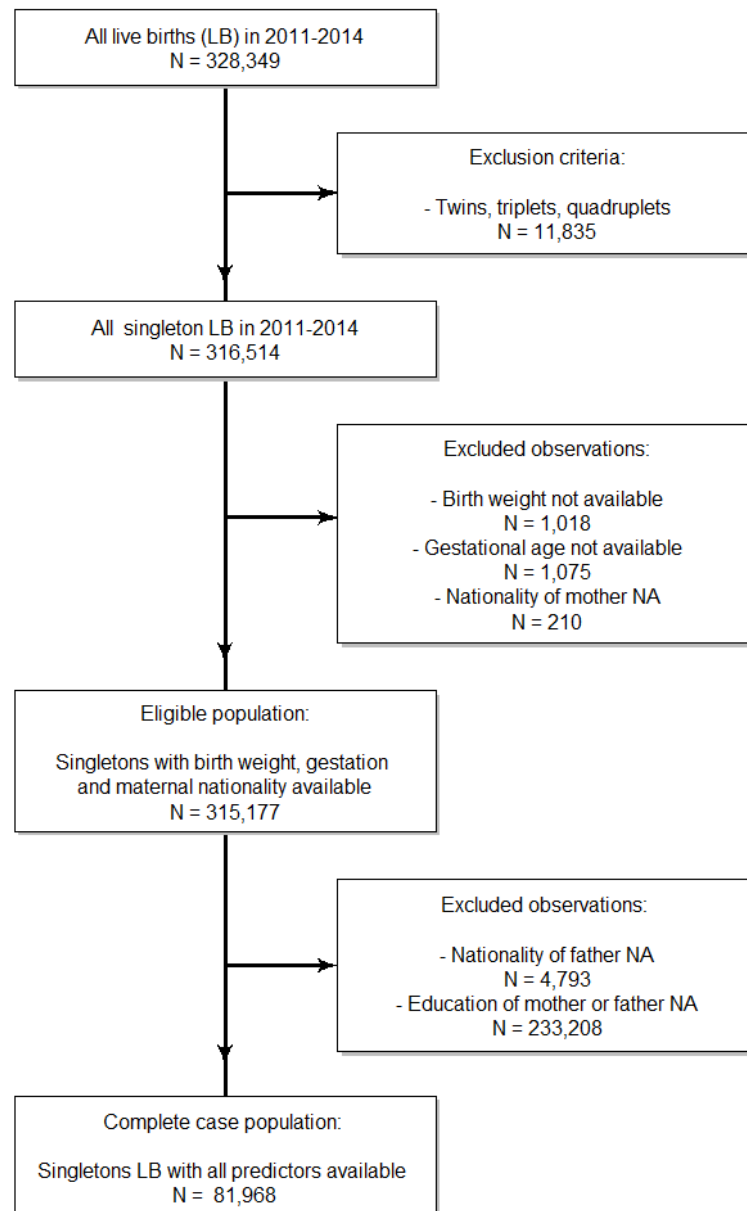

**Supplementary Figure S2. Relationship between birth weight and gestational age at birth modelled by a cubic spline function. Separate fitted curves are shown for newborn girls and boys, with all other predictors corresponding to the reference categories shown in Table 2.**

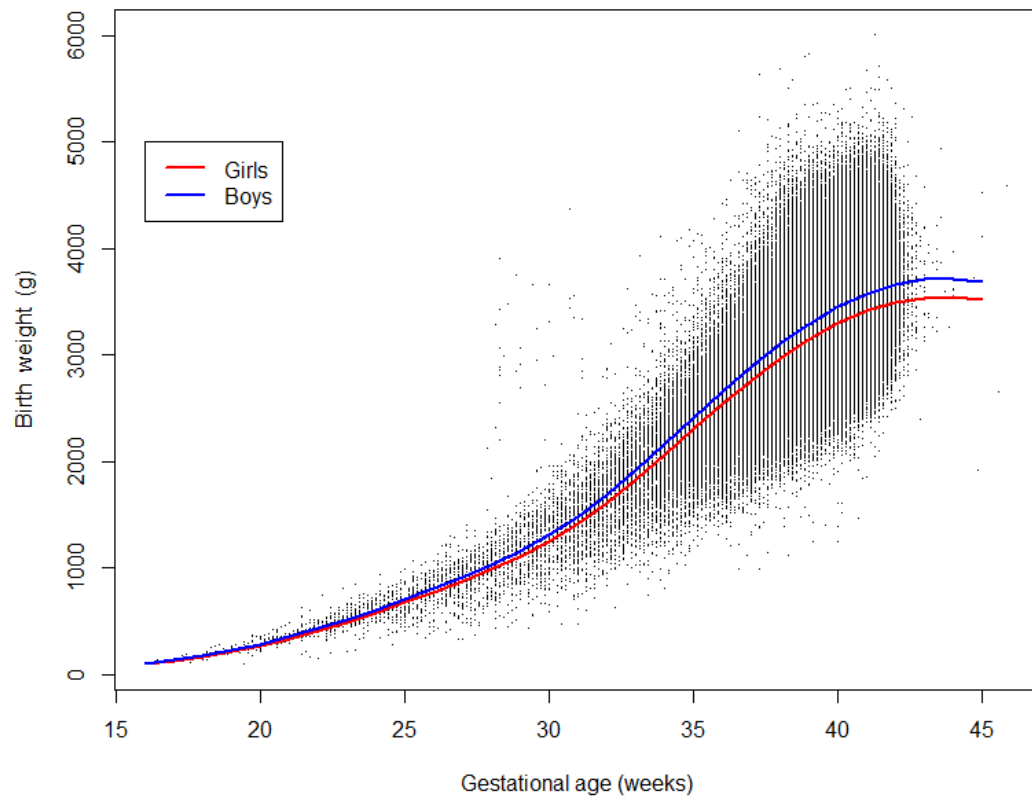

**Supplementary Figure S3. Relationship between mean gestational age and proportion of preterm live births (<37 weeks) among eligible live births across 705 regions (upper panel) and between mean birth weight and proportion of low birth weight births (<2500g) (lower panel). Results from linear regression weighted by the number of live births in each region. Prediction intervals displayed for an average-size region (n=447). GA = gestational age; BW= birth weight; 276 days correspond to 39<sup>3/7</sup> weeks.**

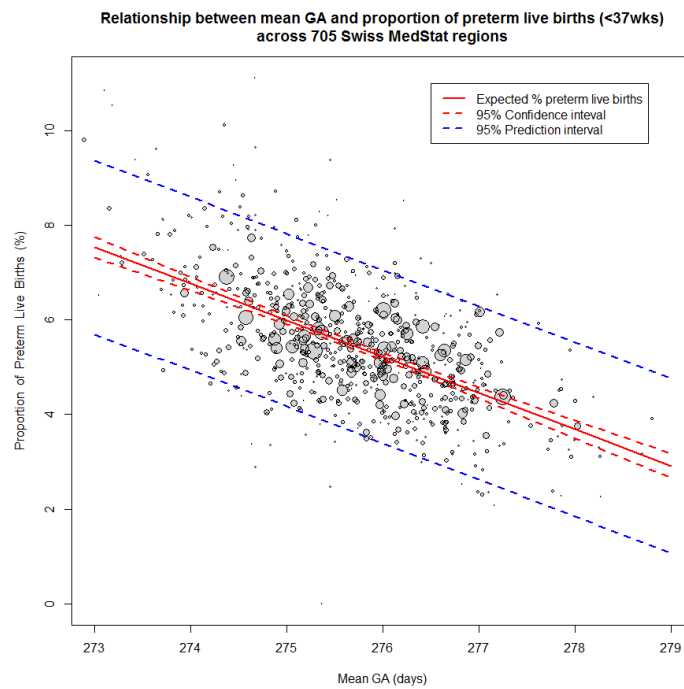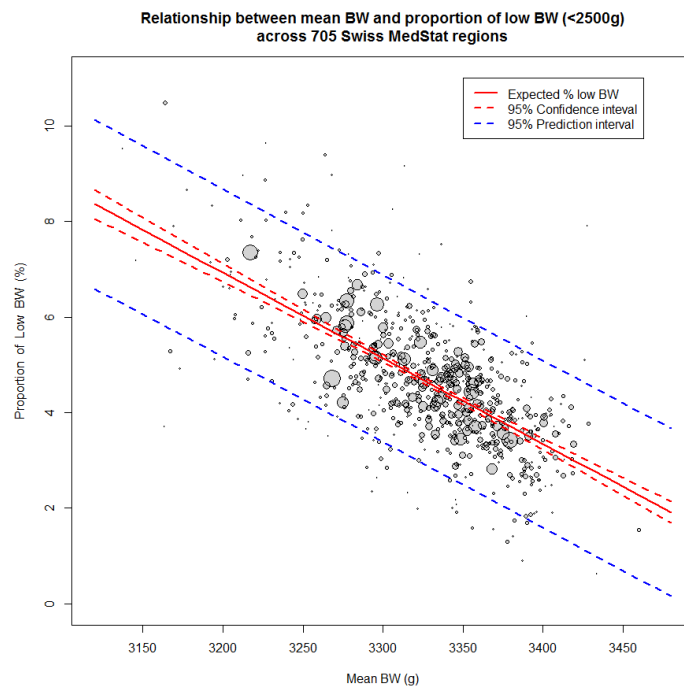

Supplement: bmjopen-2018-027834supp001.pdf [file bmjopen-2018-027834supp001.pdf]
