# Supplementary material for: Spatial epidemiology of gestational age and birth weight in Switzerland: census-based linkage study
Source: PubMed Central journal article supplement (PMC6830696; doi:10.1136/bmjopen-2018-027834), 2019-10-30
Supplement: bmjopen-2018-027834.draft_revisions.pdf [file bmjopen-2018-027834.draft_revisions.pdf]

# BMJ Open

BMJ Open is committed to open peer review. As part of this commitment we make the peer review history of every article we publish publicly available.

When an article is published we post the peer reviewers' comments and the authors' responses online. We also post the versions of the paper that were used during peer review. These are the versions that the peer review comments apply to.

The versions of the paper that follow are the versions that were submitted during the peer review process. They are not the versions of record or the final published versions. They should not be cited or distributed as the published version of this manuscript.

BMJ Open is an open access journal and the full, final, typeset and author-corrected version of record of the manuscript is available on our site with no access controls, subscription charges or pay-per-view fees (<http://bmjopen.bmj.com>).

If you have any questions on BMJ Open's open peer review process please email [info.bmjopen@bmj.com](mailto:info.bmjopen@bmj.com)

# BMJ Open

## Spatial epidemiology of gestational age and birth weight in Switzerland: Census-based linkage study

|                               |                                                                                                                                                                                                                                                                                                                                                                                                                                                                                    |
|-------------------------------|------------------------------------------------------------------------------------------------------------------------------------------------------------------------------------------------------------------------------------------------------------------------------------------------------------------------------------------------------------------------------------------------------------------------------------------------------------------------------------|
| Journal:                      | <i>BMJ Open</i>                                                                                                                                                                                                                                                                                                                                                                                                                                                                    |
| Manuscript ID                 | bmjopen-2018-027834                                                                                                                                                                                                                                                                                                                                                                                                                                                                |
| Article Type:                 | Research                                                                                                                                                                                                                                                                                                                                                                                                                                                                           |
| Date Submitted by the Author: | 19-Nov-2018                                                                                                                                                                                                                                                                                                                                                                                                                                                                        |
| Complete List of Authors:     | Skrivankova, Veronika; Universitat Bern Institut fur Sozial- und Praventivmedizin, Zwahlen , Marcel; Universitat Bern Institut fur Sozial- und Praventivmedizin<br>Adams, Mark; University of Zurich, Department of Neonatology<br>Low, Nicola; University of Bern, Institute of Social and Preventive Medicine<br>Kuehni, Claudia; Universitat Bern Institut fur Sozial- und Praventivmedizin<br>Egger, Matthias; University of Bern, Institute of Social and Preventive Medicine |
| Keywords:                     | birth weight, gestational age, spatial epidemiology, Switzerland, socio-economic position, education                                                                                                                                                                                                                                                                                                                                                                               |
|                               |                                                                                                                                                                                                                                                                                                                                                                                                                                                                                    |

SCHOLARONE™  
Manuscripts

1  
2  
3  
4  
5  
6  
7 **Spatial epidemiology of gestational age and birth weight in Switzerland:**  
8  
9 **Census-based linkage study**  
10  
11  
12  
13  
14

15 Veronika Skrivankova<sup>1</sup>, Marcel Zwahlen<sup>1</sup>, Mark Adams<sup>2</sup>, Nicola Low<sup>1</sup>,  
16  
17 Claudia E Kuehni<sup>1,3</sup>, Matthias Egger<sup>1</sup>  
18  
19  
20  
21  
22

23 1) Institute of Social and Preventive Medicine (ISPM), University of Bern, Bern, Switzerland  
24

25 2) Department of Neonatology, University Hospital Zurich, University of Zurich, Zurich,  
26  
27 Switzerland  
28

29 3) Pediatric Respiratory Medicine, Inselspital, Bern University Hospital, University of Bern,  
30  
31 Switzerland  
32  
33  
34  
35  
36  
37  
38  
39  
40  
41  
42  
43  
44  
45  
46  
47  
48  
49  
50  
51  
52  
53  
54  
55

40 Correspondence to:  
41  
42  
43  
44  
45  
46  
47  
48  
49  
50  
51  
52  
53  
54  
55

45 Professor Matthias Egger MD  
46  
47  
48  
49  
50  
51  
52  
53  
54  
55

46 Institute of Social and Preventive Medicine (ISPM), University of Bern  
47  
48  
49  
50  
51  
52  
53  
54  
55

48 Mittelstrasse 43, CH-3012 Bern, Switzerland  
49  
50  
51  
52  
53  
54  
55

50 matthias.egger@ispm.unibe.ch  
51  
52  
53  
54  
55

56 **Word counts:** Abstract 197 words, strengths and limitations of the study 129 words, main  
57 text 3145 words, 43 references, 3 tables, 2 figures, supplementary materials with 3 tables  
58 and 3 figures.  
59  
60

## ABSTRACT

**Objectives** To examine small-area variation in gestational age and birth weight in Switzerland.

**Design** Linkage of population census and survey data with Live Birth Register and smallarea analysis.

**Setting:** Resident population of Switzerland.

**Participants:** All 315,177 singleton live births recorded in the Swiss Live Birth Register 2011 to 2014.

**Primary outcome measures:** Gestational age and birth weight.

**Results:** Area-level averages of gestational age varied between 272-279 days, and between 3138-3467g for birth weight. The fully adjusted models explained 31% and 87% of spatial variation of gestational age and birth weight, respectively. Language region explained most of the variation, with shorter gestational age and lower birth weight in French- and Italian- than in German-speaking areas. Other variables explaining variation were, for gestational age, the level of urbanisation, the parents' nationality and missing father. For birth weight, they were gestational age, altitude, born out of wedlock, and parental nationality. In a subset of 69,463 live births with data on parental education, levels of education were only weakly associated with gestational age or birth weight.

**Conclusions:** In Switzerland, small area variation in birth weight is largely explained, and variation in gestational age partially explained by geocultural, socio-demographic and pregnancy factors.

### Strengths and limitations of this study

- This study was based on a large sample with national coverage, with data on neonatal and pregnancy-related predictors of gestational age and birth weight, and precise spatial data.
- No data were available on the mode of delivery, maternal smoking, mothers' weight and height or gestational diabetes.
- The fully adjusted model explained about 80% of the regional variation in birth weight and about 40% of the variation in gestational age.
- Language region, a proxy for cultural, social and behavioural factors, was a strong explanatory factor, with lower birth weight and shorter gestation in the French and Italian compared to the German language region.
- Unknown father was associated with shorter gestation and lower birth weight, indicating that children not recognised by their fathers may be at higher risk of poor outcomes.

## INTRODUCTION

Gestational age and birth weight are important indicators of prenatal development and predictors of infant morbidity, mortality and long-term health [1–4]. An understanding of geographic differences and their determinants can help to develop policies that reduce health inequalities across population groups and regions [1–4]. Many genetic, physiological, pregnancy-related, socio-economic, lifestyle and environmental factors have been reported to influence gestational age and birth weight [5–8]. Some of these factors tend to cluster in space and regional differences in health outcomes may hence be partially explained by the spatial distribution of their predictors. Importantly, both individual-level factors and the social and environmental characteristics of communities and neighbourhoods may contribute to regional differences [9,10].

Variation across small areas in pregnancy outcomes have not been studied widely. In Scotland, small area crime rates were associated with lower birth weight and with the risk of both small for gestational age babies and preterm birth [11]. A study at county level in Georgia and South Carolina in the United States showed that the proportion of African Americans was associated with low birth weight, whereas higher income was associated with higher birth weight [12]. Similarly, neighbourhood racial composition contributed to variation in low birth weight in New York State [13]. Other small-area analyses have examined associations between birth outcomes and air pollution [14,15]. To our knowledge, few small-area analyses have considered gestational age.

In Switzerland, studies of pregnancy outcomes have focused on specific groups such as migrants or HIV-infected women [16,17], but have not examined geographic variations. The Federal Office of Statistics publishes routine statistics from the Live Birth Register, which does not include geographic information [18]. The objectives of this study were to conduct a nationwide analysis of spatial variation in gestational age and birth weight, and to assess how much small-area variation was explained by available data about neonatal and pregnancy-related variables, parental characteristics and geographical variables.

## METHODS

### Data sources

We used deterministic methods to link three data sources using encrypted national identification numbers: the Live Birth Register, the Swiss National Cohort and the Structural Surveys. Registration of live births is compulsory by law in Switzerland coverage is near 100%. The Swiss National Cohort (SNC) is a long-term, national study of mortality in Switzerland [19,20], linking census and mortality records. The 1990 and 2000 censuses were the last house-to-house censuses with coverage of the entire Swiss population. From 2010 onwards, the national census was replaced by a national population register and annual postal survey of the resident population, known as Structural Surveys [21]. Each structural Survey includes a random sample of around 300,000 people aged 15 years or older; for example, in 2010, it included 317,221 persons [21]. The reference is the entire Swiss resident population and the reference day 31 December.

### Variables and definitions

We defined three sets of variables. The first set, neonatal and pregnancy-related variables come from the Live Birth Register; date of birth, birth weight, gestational age, sex and birth rank. Birth weight is measured after initial mother-child bonding, usually by the midwife using a calibrated hospital scale. Gestational age is based on the last menstrual period, with or without additional information from ultrasound scans. Birth rank was classified as 1, 2, 3 and  $\geq 4$  live births, including the current birth. Birth rank is only available if the mother was married at the time of birth, and it is counted only within the current marriage. The second set includes parental variables. The Structural Surveys provide information about the highest level of completed maternal and paternal education, classified as 'tertiary', 'secondary', or 'compulsory or less'. The Swiss National Cohort provides data about parental nationality categorised as 'Swiss', 'Southern Europe', 'Western Europe', 'Northern Europe', 'Eastern Europe', 'Other' (non-European), or missing (supplementary [Table S1](#) gives the full list of countries). The third set, geographical variables comes from the Swiss National Cohort. Each live birth was assigned an altitude and one of 705 statistical areas [22], based on the geocode of place of residence of the mother at the time of birth. Language regions are 'German', 'French' and 'Italian', and the level of urbanisation was defined using standard definitions of 'urban', 'peri-urban' and 'rural'.

### Study populations and outcomes

All singleton live births recorded in the Live Birth Register from 1 January 2011 to 31 December 2014 were eligible. Gestational age at birth and birth weight were the outcomes of interest. For each outcome, two datasets were analysed: the first, larger dataset consisted of all eligible births with complete data on gestational age, birth weight and nationality of the mother. The second was the complete case population containing eligible live births with available data on all variables, including parental education. The second dataset included married mothers only who delivered at age 20 years or older because the birth rank is available for married women only, and education is incomplete below age 20 years.

### Statistical and spatial analyses

We fitted linear mixed-effect models (LMEM) to examine the associations between the two outcomes and the neonatal and pregnancy, parental and environmental factors. In the model for birth weight, we log-transformed the outcome and used a cubic spline function with three knots at weeks 25, 30 and 35 to capture the relationship between gestational age and log birth weight. Log transforming the birth weight results in a multiplicative model. Except for gestational age, maternal age and altitude, all predictors were modelled categorically. Maternal age was modelled by a piece-wise linear function, with age group 20 to 30 years as the reference group and separate linear trends for age groups 30-40 years, over 40 years and less than 20 years. Altitude was centred at 500 m and modelled linearly. The random effects in the mixed-effect model captured area-level differences between observed and expected mean outcome, based on the 705 statistical areas [22]. In the main analysis, we fitted four models to the complete-case dataset: Model 0 contained no explanatory variables. Model 1 included birth and pregnancy-related variables: sex, birth rank and gestational age (for the analysis of birth weight). Model 2 additionally included age of the mother, parental education and nationality. Model 3 additionally included geographical variables: altitude, degree of urbanisation and language region.

We displayed mean gestational age and birth weight at area-level on maps and assessed to what extent spatial variation was accounted for by the explanatory variables. Values were categorised into seven intervals symmetric around the mean and color-coded. Spatial autocorrelation of the gestational age and birth weight across regions was tested by global and local Moran's I tests [23]. The global Moran test summarises overall spatial autocorrelation and the local test identifies areas that are correlated with neighbouring



1  
2  
3 areas. In the presence of spatial autocorrelation, model estimates are at risk of bias if the  
4 autocorrelation is not taken into account.  
5  
6

7 In a sensitivity analysis, we accounted for spatial autocorrelation using the Besag-  
8 York-Mollier (BYM) model [24] using uninformative gamma-distributed (1, 0.005) priors. The  
9 calculations were carried out using the Integrated Nested Laplace Approximation (INLA)  
10 approach [25]. Similar results from models with and without the spatial component indicate  
11 low bias. Finally, we repeated analyses of birth weight without adjusting for gestational age.  
12 All analyses and maps were done in R 3.3.2 [26] using packages lme4, maptools, sp, spdep,  
13 rgdal, INLA, GISTools, rgeos, raster and ggplot2.  
14  
15  
16  
17  
18  
19  
20  
21

### 22 **Patient and public involvement**

23  
24 This analysis was based on routine registry data and no patients were involved in developing  
25 the research question, outcome measures and overall design of the study. Due to the  
26 anonymous nature of the data, we were unable to disseminate the results of the research  
27 directly to study participants.  
28  
29  
30  
31  
32  
33  
34  
35  
36  
37  
38  
39  
40  
41  
42  
43  
44  
45  
46  
47  
48  
49  
50  
51  
52  
53  
54  
55  
56  
57  
58  
59  
60

## RESULTS

### Characteristics of study populations

A total of 328,349 live births were recorded in Switzerland between 1 January 2011 and 31 December 2014. We excluded non-singleton live births (n=11,835) and those with missing gestational age, birth weight or maternal nationality. The eligible study population therefore included 315,177 singleton live births. The complete case population consisted of 69,463 singleton live births with values available for all predictors including parental education, for which complete data were only available in the Structural Surveys (supplementary [Figure S1](#)).

[Table 1](#) shows the distributions of predictors and outcomes in the two study populations. Data about the nationality of fathers was missing for 1.5% of eligible live births. In almost all of these cases, information about the father was missing completely, indicating that the father is unknown to the authorities. Apart from missing data, the distributions of most variables were similar between the two nested datasets. By design, the complete case population included married mothers only. The proportion of Swiss mothers and fathers was higher in the complete case population than in the eligible population. Birth at full term was defined as between 39 and 41 weeks of gestation (273 to 287 days). The mean gestational age in the eligible population was 276 days (SD 12) and the mean birth weight 3328 g (SD 515). The corresponding figures in the complete case population were 276 days (SD 12) and 3349 g (SD 501).

### Maps of gestational age and birth weight

[Figure 1](#) presents maps of Switzerland with crude average gestational age and birth weight across the 705 areas. For both outcomes, the maps are broadly similar between the eligible and complete case populations. For gestational age, area-level averages for the eligible population vary between 272 and 279 days. For the complete case population variation was greater, from 265 to 281 days, as expected for a smaller sample. The map shows shorter gestation in the Western, North Western region and Southern (Canton of Ticino) regions of Switzerland, with a patchy pattern in the densely populated areas between the Alps (across the centre) and Jura mountain ranges (to the North West). For birth weight, area-level averages vary between 3138 and 3467g for the eligible population and between 3020 and 3597g for the complete case population. The maps for birth weight show lower birth weights

1  
2  
3 in the Western and Southern regions of the country. The French and Italian-speaking regions  
4 are in the West and South of Switzerland, with the remainder being German-speaking.  
5  
6

### 7 **Multivariable analyses**

8  
9 Table 2 shows associations of area-level mean gestational age at birth and mean birth  
10 weight with pregnancy, parental and environmental factors from the fully adjusted linear  
11 mixed-effects models (model 3). For gestational age, the largest differences are observed  
12 across categories of maternal age at birth, with pregnancies in mothers aged 40 years or  
13 older, and below 20 years about 3 days shorter than in mothers aged 20 to 30 years in both  
14 the eligible and the complete case populations. Of note, compared with Swiss fathers,  
15 pregnancies were about 4 days shorter if the nationality of the father was missing. Smaller  
16 differences in gestational age were observed across categories of sex, birth rank, nationality  
17 of the mother, urbanisation and between language regions (Table 2). In the complete case  
18 population, lower levels of education were associated with shorter pregnancies. Gestational  
19 age at birth was not associated with altitude.  
20  
21  
22  
23  
24  
25  
26  
27  
28  
29

30 Supplementary Figure S2 shows the relationship between gestational age and birth  
31 weight separately for male and female newborns. Male newborns were about 5% heavier  
32 than female newborns and birth weight increased with birth order (Table 2). In contrast to  
33 gestational age, mother's age was not associated with birth weight. Babies born to mothers  
34 or fathers from Northern or Eastern Europe were slightly heavier than babies born to Swiss  
35 mothers; birth weights were lowest for babies of fathers with missing nationality. Birth  
36 weight slightly decreased with increasing parental educational attainment. Babies born in  
37 the French and Italian-speaking regions were lighter than babies born in the German-  
38 speaking Switzerland. Finally, birth weight decreased with increasing altitude of residence.  
39  
40  
41  
42  
43  
44  
45  
46

### 47 **Proportion of spatial variation explained**

48  
49 The fully adjusted model (model 3) for gestational age explained 31% and 41% of the spatial  
50 variation across the 705 areas for eligible and complete case populations, respectively. The  
51 corresponding figures for birth weight were 87% and 82%. When assessing each factor  
52 separately (Table 3), language region alone explained most of the spatial variation for both  
53 outcomes. For gestational age, level of urbanisation of the mother's place of residence also  
54 explained part of the variation. Factors that also contributed to explaining the spatial  
55 variation in birth weight were gestational age, parental nationalities, altitude at the mother's  
56  
57  
58  
59  
60

1  
2  
3 place of residence and birth order. [Figure 2](#) illustrates the reduction in the spatial variation  
4 of gestational age and birth weight with maps, when moving from model 0 (0% reduction) to  
5 models 1, 2 and 3, based on the complete case population.  
6  
7

### 8 9 **Spatial autocorrelation and sensitivity analyses**

10  
11 For gestational age, the global Moran's I statistic, based on the complete case dataset and  
12 model 0, was  $I=0.19$ , with  $P<10^{-13}$ . After adjusting for all the predictors in model 3 there was  
13 still some residual autocorrelation ( $I=0.09$ ,  $P=0.0001$ ). For birth weight, the corresponding  
14 Moran's I statistic was  $I=0.26$ , with  $P<10^{-15}$ . After adjusting for all predictors in model 3 there  
15 was little residual autocorrelation ( $I=0.04$ ,  $P=0.07$ ). [Supplementary Table S2](#) compares the  
16 results from model 3 accounting and not accounting for spatial autocorrelation. The results  
17 are similar and the potential bias from residual spatial autocorrelation is therefore unlikely  
18 to be a major issue. Repeating analyses of birth weight without adjusting for gestational age  
19 produced generally similar coefficients ([supplementary Table S3](#)). Associations with maternal  
20 age, maternal education and language regions were slightly stronger in model 3 without  
21 adjustment for gestational age, possibly because some of their effect was mediated by  
22 gestational age. Model 3 without gestational age explained 77% of the spatial variation both  
23 in the eligible and complete case populations.  
24  
25  
26  
27  
28  
29  
30  
31  
32  
33  
34  
35  
36  
37  
38  
39  
40  
41  
42  
43  
44  
45  
46  
47  
48  
49  
50  
51  
52  
53  
54  
55  
56  
57  
58  
59  
60

## DISCUSSION

Our study assessed factors associated with gestational age and birth weight in Switzerland and their contribution to spatial variation, based on routinely collected data. Gestational age at birth was strongly associated with maternal age, missing information on the father and language region. Birth weight was associated with sex, birth rank, missing information on the father, parental education, altitude and language region. There was substantial regional variation and spatial autocorrelation across regions. The variables included in the fully adjusted model explained about 80% of the regional variation in birth weight and about 40% of the regional variation in gestational age. Strengths of this study include a large sample with national coverage of the Swiss resident population, as well as the availability of data on several relevant predictors, either on all births or on a large random sample of eligible births. Precise spatial data and spatial statistics allowed us to assess the proportion of area-level variation explained, spatial autocorrelation and gauge the likelihood of bias due to residual autocorrelation.

This study found important spatial variation in both gestational age and birth weight in Switzerland. Language region in Switzerland was the single factor that explained the greatest proportion of spatial variation in gestational age and birth weight. In the French and Italian speaking regions, gestational age was shorter and birth weight lower than in the German speaking part. Language region combines a wide range of cultural, social and behavioural factors, including diet, smoking and alcohol consumption [27] of parents, as well as their ancestry, which probably explain its strong explanatory power. Other factors that could not be measured directly, such as health care provision, might have accounted for some of the unexplained variation. Data about the mode of delivery (vaginal or by Caesarean section, induced or spontaneous) were not available. Whilst Caesarean section rates vary geographically, they are unlikely to account for the observed spatial variation in gestational age at birth. Geographical patterns of Caesarean section are largely driven by urban-rural differences [28].

While young and old maternal age are well-known predictors of shorter gestation [29,30], the association we found with missing data on the father's nationality was somewhat unexpected. In the vast majority of cases, the information is missing because no father came forward and officially accepted paternity of the child. It is possible that missing

1  
2  
3 data about the father are an indicator of lower socio-economic position and social support of  
4 the mother, resulting in greater vulnerability. Studies from the United States of America  
5 found a missing name of the father on the infant's birth certificate was associated with lower  
6 education, smoking during pregnancy, preterm birth, lower birth weight, no breastfeeding  
7 and higher neonatal and post-neonatal mortality [31–34]. Children not recognised by their  
8 fathers may thus be a group at higher risk of infant and child morbidity and mothers might  
9 benefit from additional care during pregnancy and postnatally.  
10  
11  
12  
13  
14  
15

16  
17 There are several limitations to our study. The complete case dataset was restricted  
18 to married mothers because the Swiss Live Birth Register only records birth rank if the  
19 mother was married at the time of birth. This limitation might have resulted, for example, in  
20 the weaker than expected association between birth weight and parental education. Studies  
21 from countries such as the Netherlands have shown larger gaps across levels of educational  
22 attainment, which were largest amongst unmarried women [35]. We did not have data  
23 about maternal health-related behaviours such as smoking [36], mothers' weight and height  
24 [36], disease such as gestational diabetes and data on parental genetic factors. Whilst  
25 parental nationality and education might have served as crude proxies for some missing  
26 variables, individual-level data about these factors would be valuable. A recent large-scale  
27 meta-analysis of genome-wide association data indicated that genetic factors influence birth  
28 weight through their effects on gestational age, maternal glucose metabolism, cytochrome  
29 P450 activity and possibly on maternal immune function and blood pressure [37]. Of note,  
30 compared to the foetus who carries maternal and paternal genes, maternal genes exert a  
31 larger effect on gestational age and a weaker effect on birth weight [38,39]. Examining the  
32 proportion of preterm births (before 37 weeks) or the proportion of low birth weights  
33 (<2500g) might seem clinically more relevant than the means examined in this study.  
34 However, from a statistical point of view, dichotomizing continuous data is "a practice to  
35 avoid" [40], while the mean observed in a region and the proportion of preterm and low  
36 birth weight births are highly correlated, as shown in supplementary [Figure S3](#).  
37  
38  
39  
40  
41  
42  
43  
44  
45  
46  
47  
48  
49  
50  
51  
52

53  
54 We adjusted analyses of birth weight for gestational age, which may mediate the  
55 effects of other variables, for example maternal age. Adjusting for a variable on the causal  
56 pathway has been criticised because it may introduce selection bias (or collider bias in the  
57 language of directed acyclic graphs), if there are unknown or unmeasured factors that have  
58 an effect on both gestational age and birth weight [41–43]. In our study results were broadly  
59  
60

1  
2  
3 similar with and without adjustment for gestational age and the focus of our study was not  
4 on causal inference, but on gaining an understanding of the factors contributing to spatial  
5 variation of birth weight and gestational age.  
6  
7

8  
9 In conclusion, our study identified important differences in mean gestational age and  
10 birth weight across Switzerland. Small area variation in birth weight is largely, and in  
11 gestational age partially, explained by pregnancy-related, parental, and environmental  
12 factors.  
13  
14  
15  
16  
17  
18  
19  
20  
21  
22  
23  
24  
25  
26  
27  
28  
29  
30  
31  
32  
33  
34  
35  
36  
37  
38  
39  
40  
41  
42  
43  
44  
45  
46  
47  
48  
49  
50  
51  
52  
53  
54  
55  
56  
57  
58  
59  
60

For peer review only

## REFERENCES

- 1 Regev RH, Lusky A, Dolfin T, *et al.* Excess mortality and morbidity among small-for-gestational-age premature infants: a population-based study. *J Pediatr* 2003;**143**:186–91.
- 2 Wilcox AJ. Birth weight and perinatal mortality: the effect of maternal smoking. *Am J Epidemiol* 1993;**137**:1098–104.
- 3 Barker DJ, Winter PD, Osmond C, *et al.* Weight in infancy and death from ischaemic heart disease. *Lancet* 1989;**ii**:577–80.<http://www.ncbi.nlm.nih.gov/pubmed/2570282> (accessed 3 Feb 2015).
- 4 Lubchenco LO, Searls DT, Brazie J V. Neonatal mortality rate: relationship to birth weight and gestational age. *J Pediatr* 1972;**81**:814–22.
- 5 de Bernabé J V., Soriano T, Albaladejo R, *et al.* Risk factors for low birth weight: a review. *Eur J Obstet Gynecol Reprod Biol* 2004;**116**:3–15.
- 6 Kramer MS. Determinants of low birth weight: methodological assessment and meta-analysis. *Bull World Health Organ* 1987;**65**:663–737.
- 7 Secker-Walker RH, Vacek PM. Relationships between cigarette smoking during pregnancy, gestational age, maternal weight gain, and infant birthweight. *Addict Behav* 2003;**28**:55–66. doi:10.1016/S0306-4603(01)00216-7
- 8 Matoba N, Yu Y, Mestan K, *et al.* Differential Patterns of 27 Cord Blood Immune Biomarkers Across Gestational Age. *Pediatrics* 2009;**123**:1320–8. doi:10.1542/peds.2008-1222
- 9 Diez Roux A V, Mair C. Neighborhoods and health. *Ann N Y Acad Sci* 2010;**1186**:125–45. doi:10.1111/j.1749-6632.2009.05333.x
- 10 Macintyre S, Ellaway A, Cummins S. Place effects on health: how can we conceptualise, operationalise and measure them? *Soc Sci Med* 2002;**55**:125–39.<http://www.ncbi.nlm.nih.gov/pubmed/12137182>
- 11 Clemens T, Dibben C. Living in stressful neighbourhoods during pregnancy: An observational study of crime rates and birth outcomes. *Eur J Public Health* 2017;**27**:197–202. doi:10.1093/eurpub/ckw131
- 12 Kirby RS, Liu J, Lawson AB, *et al.* Spatio-temporal patterning of small area low birth weight incidence and its correlates: A latent spatial structure approach. *Spat Spatiotemporal Epidemiol* 2011;**2**:265–71. doi:10.1016/j.sste.2011.07.011



- 1  
2  
3 13 Insaf TZ, Talbot T. Identifying areas at risk of low birth weight using spatial  
4 epidemiology: A small area surveillance study. *Prev Med (Baltim)* 2016;**88**:108–14.  
5 doi:10.1016/j.ypmed.2016.03.019  
6  
7  
8 14 Dibben C, Clemens T. Place of work and residential exposure to ambient air pollution  
9 and birth outcomes in Scotland, using geographically fine pollution climate mapping  
10 estimates. *Environ Res* 2015;**140**:535–41. doi:10.1016/j.envres.2015.05.010  
11  
12  
13 15 Ghosh JKC, Wilhelm M, Su J, *et al.* Assessing the Influence of Traffic-related Air  
14 Pollution on Risk of Term Low Birth Weight on the Basis of Land-Use-based Regression  
15 Models and Measures of Air Toxics. *Am J Epidemiol* 2012;**175**:1262–74.  
16 doi:10.1093/aje/kwr469  
17  
18 16 Aebi-Popp K, Lapaire O, Glass TR, *et al.* Pregnancy and delivery outcomes of HIV  
19 infected women in Switzerland 2003-2008. *J Perinat Med* 2010;**38**:353–8.  
20 doi:10.1515/JPM.2010.052  
21  
22 17 Jaeger FN, Hossain M, Kiss L, *et al.* The health of migrant children in Switzerland. *Int J*  
23 *Public Health* 2012;**57**:659–71. doi:10.1007/s00038-012-0375-8  
24  
25 18 Federal Statistical Office. Births.  
26 [https://www.bfs.admin.ch/bfs/de/home/statistiken/bevoelkerung/geburten-](https://www.bfs.admin.ch/bfs/de/home/statistiken/bevoelkerung/geburten-todesfaelle/geburten.html)  
27 [todesfaelle/geburten.html](https://www.bfs.admin.ch/bfs/de/home/statistiken/bevoelkerung/geburten-todesfaelle/geburten.html) (accessed 18 Sep 2018).  
28  
29 19 Spörri A, Zwahlen M, Egger M, *et al.* The Swiss National Cohort: a unique database for  
30 national and international researchers. *Int J Public Heal* 2010;**55**:239–42.  
31 doi:10.1007/s00038-010-0160-5  
32  
33 20 Bopp M, Spörri A, Zwahlen M, *et al.* Cohort Profile: the Swiss National Cohort--a  
34 longitudinal study of 6.8 million people. *Int J Epidemiol* 2009;**38**:379–84.  
35 doi:10.1093/ije/dyn042  
36  
37 21 Federal Statistical Office. Structural Survey.  
38 <https://www.bfs.admin.ch/bfs/en/home/statistics/population/surveys/se.html>  
39 (accessed 18 Sep 2018).  
40  
41 22 Federal Statistical Office. Swiss MedStat regions.  
42 <https://www.bfs.admin.ch/bfs/de/home/statistiken/gesundheit/nomenklaturen/med>  
43 [sreg.html](https://www.bfs.admin.ch/bfs/de/home/statistiken/gesundheit/nomenklaturen/med) (accessed 18 Sep 2018).  
44  
45 23 Moran PAP. Notes on Continuous Stochastic Phenomena. *Biometrika* 1950;**37**:17–  
46 23.<http://www.jstor.org/stable/2332142>  
47  
48  
49  
50  
51  
52  
53  
54  
55  
56  
57  
58  
59  
60

- 1  
2  
3 24 Besag J, York J, Mollié A. Bayesian image restoration, with two applications in spatial  
4 statistics. *Ann Inst Stat Math* 1991;:1–20.  
5  
6  
7 25 Rue H, Martino S, Chopin N. Approximate Bayesian inference for latent Gaussian  
8 models by using integrated nested Laplace approximations. *J R Stat Soc Ser B*  
9 2009;**71**:319–92.  
10  
11  
12 26 The R Core Team: R. A Language and Environment for Statistical Computing. Vienna,  
13 Austria. 2014;ISBN 3-900.<http://www.r-project.org>.  
14  
15  
16 27 Faeh D, Minder C, Gutzwiller F, *et al*. Culture, risk factors and mortality: can  
17 Switzerland add missing pieces to the European puzzle? *J Epidemiol Community Heal*  
18 2009;**63**:639–645.  
19  
20  
21 28 Federal Office of Statistics. Rate of Caesarian section (MS regions).  
22 [https://www.bfs.admin.ch/bfs/de/home/statistiken/kataloge-](https://www.bfs.admin.ch/bfs/de/home/statistiken/kataloge-datenbanken/karten.assetdetail.4262550.html)  
23 [datenbanken/karten.assetdetail.4262550.html](https://www.bfs.admin.ch/bfs/de/home/statistiken/kataloge-datenbanken/karten.assetdetail.4262550.html) (accessed 31 Aug 2018).  
24  
25  
26  
27 29 Kozuki N, Lee AC, Silveira MF, *et al*. The associations of parity and maternal age with  
28 small-for-gestational-age, preterm, and neonatal and infant mortality: A meta-  
29 analysis. *BMC Public Health*. 2013;**13**:S2. doi:10.1186/1471-2458-13-S3-S2  
30  
31  
32 30 Restrepo-Méndez MC, Lawlor DA, Horta BL, *et al*. The association of maternal age  
33 with birthweight and gestational age: A cross-cohort comparison. *Paediatr Perinat*  
34 *Epidemiol* 2015;**29**:31–40. doi:10.1111/ppe.12162  
35  
36  
37  
38 31 Alio AP, Mbah AK, Kornosky JL, *et al*. Assessing the impact of paternal involvement on  
39 racial/ethnic disparities in infant mortality rates. *J Community Health* 2011;**36**:63–8.  
40 doi:10.1007/s10900-010-9280-3  
41  
42  
43 32 Gaudino JA, Jenkins B, Rochat RW. No fathers' names: A risk factor for infant mortality  
44 in the State of Georgia, Usa. *Soc Sci Med* 1999;**48**:253–65. doi:10.1016/S0277-  
45 9536(98)00342-6  
46  
47  
48  
49 33 Cheng ER, Hawkins SS, Rifas-Shiman SL, *et al*. Association of missing paternal  
50 demographics on infant birth certificates with perinatal risk factors for childhood  
51 obesity. *BMC Public Health* 2016;**16**:1–10. doi:10.1186/s12889-016-3110-1  
52  
53  
54 34 Tan H, Wen SW, Walker M, *et al*. Missing paternal demographics: A novel indicator for  
55 identifying high risk population of adverse pregnancy outcomes. *BMC Pregnancy*  
56 *Childbirth* 2004;**4**. doi:10.1186/1471-2393-4-21  
57  
58  
59  
60 35 Jansen PW, Tiemeier H, Looman CWN, *et al*. Explaining educational inequalities in

- 1  
2  
3 birthweight: The Generation R Study. *Paediatr Perinat Epidemiol* 2009;**23**:216–28.  
4 doi:10.1111/j.1365-3016.2009.01023.x  
5  
6  
7 36 Wen SW, Goldenberg RL, Cutter GR, *et al.* Smoking, maternal age, fetal growth, and  
8 gestational age at delivery. *Am J Obstet Gynecol* 1990;**162**:53–8. doi:10.1016/0002-  
9 9378(90)90819-5  
10  
11  
12 37 Beaumont RN, Warrington NM, Cavadino A, *et al.* Genome-wide association study of  
13 offspring birth weight in 86 577 women identifies five novel loci and highlights  
14 maternal genetic effects that are independent of fetal genetics. *Hum Mol Genet*  
15 2018;**27**:742–56. doi:10.1093/hmg/ddx429  
16  
17  
18 38 Beaty TH. Invited commentary: Two studies of genetic control of birth weight where  
19 large data sets were available. *Am J Epidemiol* 2007;**165**:753–5.  
20  
21  
22 doi:10.1093/aje/kwk106  
23  
24  
25 39 Lunde A, Melve KK, Gjessing HK, *et al.* Genetic and environmental influences on birth  
26 weight, birth length, head circumference, and gestational age by use of population-  
27 based parent-offspring data. *Am J Epidemiol* 2007;**165**:734–41.  
28  
29  
30 doi:10.1093/aje/kwk107  
31  
32  
33 40 Dawson N V., Weiss R. Dichotomizing continuous variables in statistical analysis: A  
34 practice to avoid. *Med Decis Mak* 2012;**32**:225–6. doi:10.1177/0272989X12437605  
35  
36  
37 41 Cole SR, Platt RW, Schisterman EF, *et al.* Illustrating bias due to conditioning on a  
38 collider. *Int J Epidemiol* 2010;**39**:417–20. doi:10.1093/ije/dyp334  
39  
40  
41 42 Delbaere I, Vansteelandt S, De Bacquer D, *et al.* Should we adjust for gestational age  
42 when analysing birth weights? The use of z-scores revisited. *Hum Reprod*  
43 2007;**22**:2080–3. doi:10.1093/humrep/dem151  
44  
45  
46 43 Wilcox AJ, Weinberg CR, Basso O. On the pitfalls of adjusting for gestational age at  
47 birth. *Am J Epidemiol* 2011;**174**:1062–8. doi:10.1093/aje/kwr230  
48  
49  
50  
51  
52  
53  
54  
55  
56  
57  
58  
59  
60

**Table 1. Characteristics of complete case and eligible study populations.**

|                                  | Eligible population |                                     |                               | Complete case population |                                     |                               |
|----------------------------------|---------------------|-------------------------------------|-------------------------------|--------------------------|-------------------------------------|-------------------------------|
|                                  | No. (%)             | Gestational age (days)<br>Mean (SD) | Birth weight (g)<br>Mean (SD) | No. (%)                  | Gestational age (days)<br>Mean (SD) | Birth weight (g)<br>Mean (SD) |
| <b>Total</b>                     | 315177 (100%)       | 276 (12)                            | 3328 (515)                    | 69463 (100%)             | 276 (12)                            | 3349 (501)                    |
| <b>Birth weight (g)</b>          |                     |                                     |                               |                          |                                     |                               |
| <1500                            | 2141 (0.7%)         | 196 (27)                            | 966 (354)                     | 347 (0.5%)               | 197 (29)                            | 969 (516)                     |
| 1500-1999                        | 2413 (0.8%)         | 238 (15)                            | 1800 (142)                    | 513 (0.7%)               | 239 (15)                            | 1804 (503)                    |
| 2000-2499                        | 10036 (3.2%)        | 258 (14)                            | 2312 (134)                    | 1993 (2.9%)              | 258 (13)                            | 2313 (490)                    |
| ≥ 2500                           | 300586 (95.4%)      | 277 (9)                             | 3391 (423)                    | 66609 (95.9%)            | 277 (9)                             | 3404 (502)                    |
| <b>Gestation. age (weeks)</b>    |                     |                                     |                               |                          |                                     |                               |
| <32 <sup>o</sup>                 | 2333 (0.7%)         | 195 (23)                            | 1108 (527)                    | 381 (0.5%)               | 195 (24)                            | 1127 (512)                    |
| 32 <sup>o</sup> -34 <sup>o</sup> | 3950 (1.3%)         | 237 (6)                             | 2144 (424)                    | 800 (1.2%)               | 237 (6)                             | 2138 (492)                    |
| 35 <sup>o</sup> -36 <sup>o</sup> | 10907 (3.5%)        | 253 (4)                             | 2686 (431)                    | 2296 (3.3%)              | 253 (4)                             | 2698 (490)                    |
| ≥ 37 <sup>o</sup>                | 297987 (94.5%)      | 278 (8)                             | 3385 (440)                    | 65986 (95%)              | 278 (8)                             | 3399 (502)                    |
| <b>Sex</b>                       |                     |                                     |                               |                          |                                     |                               |
| Female                           | 152757 (48.5%)      | 276 (12)                            | 3260 (494)                    | 33698 (48.5%)            | 276 (11)                            | 3277 (499)                    |
| Male                             | 162420 (51.5%)      | 275 (13)                            | 3392 (525)                    | 35765 (51.5%)            | 276 (12)                            | 3416 (504)                    |
| <b>Birth rank</b>                |                     |                                     |                               |                          |                                     |                               |
| 1                                | 115871 (36.8%)      | 276 (13)                            | 3278 (511)                    | 30647 (44.1%)            | 276 (12)                            | 3278 (503)                    |
| 2                                | 97705 (31%)         | 275 (11)                            | 3390 (493)                    | 28544 (41.1%)            | 276 (11)                            | 3389 (502)                    |
| 3                                | 28738 (9.1%)        | 275 (11)                            | 3433 (502)                    | 8154 (11.7%)             | 276 (11)                            | 3438 (501)                    |
| ≥ 4                              | 7616 (2.4%)         | 276 (12)                            | 3463 (527)                    | 2118 (3%)                | 276 (11)                            | 3479 (494)                    |
| missing (not married)            | 65247 (20.7%)       | 276 (14)                            | 3263 (536)                    | -                        | -                                   | -                             |
| <b>Civil status</b>              |                     |                                     |                               |                          |                                     |                               |
| Married                          | 250055 (79.3%)      | 276 (12)                            | 3345 (508)                    | 69463 (100%)             | 276 (12)                            | 3349 (502)                    |
| Single                           | 56462 (17.9%)       | 276 (14)                            | 3263 (533)                    | 0 (0%)                   | -                                   | -                             |
| Divorced                         | 8353 (2.7%)         | 274 (14)                            | 3258 (556)                    | 0 (0%)                   | -                                   | -                             |
| Widow                            | 307 (0.1%)          | 274 (14)                            | 3286 (550)                    | 0 (0%)                   | -                                   | -                             |
| <b>Maternal age (years)</b>      |                     |                                     |                               |                          |                                     |                               |
| mean (SD)                        | 31.7 (5.0)          |                                     |                               | 32.2 (4.6)               |                                     |                               |
| < 20                             | 2679 (0.8%)         | 275 (16)                            | 3224 (554)                    | 0 (0%)                   | -                                   | -                             |
| ≥ 20-25                          | 28615 (9.1%)        | 277 (12)                            | 3317 (511)                    | 4365 (6.3%)              | 277 (12)                            | 3359 (497)                    |
| ≥ 25-30                          | 82620 (26.2%)       | 276 (12)                            | 3330 (506)                    | 17764 (25.6%)            | 276 (11)                            | 3346 (505)                    |
| ≥ 30-35                          | 118303 (37.5%)      | 276 (12)                            | 3335 (510)                    | 28108 (40.5%)            | 276 (12)                            | 3351 (501)                    |
| ≥ 35-40                          | 67914 (21.5%)       | 275 (12)                            | 3333 (523)                    | 16021 (23.1%)            | 275 (11)                            | 3353 (501)                    |
| ≥ 40                             | 15046 (4.8%)        | 273 (14)                            | 3286 (555)                    | 3205 (4.6%)              | 273 (14)                            | 3304 (501)                    |
| <b>Nationality mother</b>        |                     |                                     |                               |                          |                                     |                               |
| Switzerland                      | 194570 (61.7%)      | 276 (12)                            | 3322 (511)                    | 46651 (67.2%)            | 276 (11)                            | 3342 (504)                    |
| Southern Europe                  | 23585 (7.5%)        | 275 (12)                            | 3251 (494)                    | 4763 (6.9%)              | 276 (11)                            | 3269 (501)                    |
| Western Europe                   | 26005 (8.3%)        | 276 (12)                            | 3348 (516)                    | 4799 (6.9%)              | 276 (12)                            | 3369 (499)                    |
| Northern Europe                  | 3695 (1.2%)         | 276 (13)                            | 3418 (510)                    | 703 (1%)                 | 276 (13)                            | 3433 (489)                    |
| Eastern Europe                   | 38762 (12.3%)       | 276 (13)                            | 3397 (523)                    | 7743 (11.1%)             | 276 (12)                            | 3428 (499)                    |
| Other                            | 28560 (9.1%)        | 275 (14)                            | 3313 (535)                    | 4804 (6.9%)              | 275 (13)                            | 3331 (492)                    |
| <b>Nationality father</b>        |                     |                                     |                               |                          |                                     |                               |
| Switzerland                      | 191589 (60.8%)      | 276 (12)                            | 3329 (506)                    | 47018 (67.7%)            | 276 (12)                            | 3346 (504)                    |
| Southern Europe                  | 31466 (10%)         | 275 (12)                            | 3256 (493)                    | 6473 (9.3%)              | 275 (11)                            | 3273 (499)                    |
| Western Europe                   | 26954 (8.6%)        | 276 (12)                            | 3353 (518)                    | 4949 (7.1%)              | 276 (12)                            | 3376 (486)                    |
| Northern Europe                  | 3911 (1.2%)         | 276 (12)                            | 3406 (510)                    | 724 (1%)                 | 276 (13)                            | 3412 (492)                    |
| Eastern Europe                   | 35387 (11.2%)       | 276 (13)                            | 3397 (528)                    | 6960 (10%)               | 276 (12)                            | 3424 (503)                    |
| Other                            | 21077 (6.7%)        | 276 (13)                            | 3307 (531)                    | 3339 (4.8%)              | 276 (12)                            | 3318 (502)                    |
| missing                          | 4793 (1.5%)         | 272 (23)                            | 3148 (693)                    | -                        | -                                   | -                             |
| <b>Education mother</b>          |                     |                                     |                               |                          |                                     |                               |
| Tertiary                         | 42088 (13.4%)       | 276 (12)                            | 3344 (500)                    | 28016 (40.3%)            | 276 (12)                            | 3356 (499)                    |
| Secondary                        | 48878 (15.5%)       | 276 (12)                            | 3328 (509)                    | 32614 (47.0%)            | 276 (12)                            | 3343 (505)                    |
| Compulsory                       | 14642 (4.6%)        | 275 (13)                            | 3329 (534)                    | 8833 (12.7%)             | 275 (12)                            | 3345 (501)                    |
| Unknown (age <20 yrs)            | 2679 (0.8%)         | 275 (16)                            | 3224 (554)                    | -                        | -                                   | -                             |
| missing                          | 206890 (65.6%)      | 276 (12)                            | 3326 (517)                    | -                        | -                                   | -                             |
| <b>Education father</b>          |                     |                                     |                               |                          |                                     |                               |
| Tertiary                         | 49848 (15.8%)       | 276 (12)                            | 3348 (497)                    | 34325 (49.4%)            | 276 (12)                            | 3357 (501)                    |
| Secondary                        | 41301 (13.1%)       | 276 (12)                            | 3323 (511)                    | 26857 (38.7%)            | 276 (12)                            | 3340 (502)                    |
| Compulsory                       | 13731 (4.4%)        | 276 (12)                            | 3323 (514)                    | 8281 (11.9%)             | 275 (12)                            | 3340 (506)                    |
| missing                          | 210297 (66.7%)      | 276 (13)                            | 3325 (519)                    | -                        | -                                   | -                             |
| <b>Altitude (m)</b>              |                     |                                     |                               |                          |                                     |                               |
| mean (SD)                        | 515 (189)           |                                     |                               | 511 (181)                |                                     |                               |
| <b>Urbanisation</b>              |                     |                                     |                               |                          |                                     |                               |
| Urban                            | 96643 (30.7%)       | 276 (13)                            | 3326 (517)                    | 18516 (26.7%)            | 276 (12)                            | 3344 (498)                    |
| Peri-urban                       | 138826 (44%)        | 275 (12)                            | 3329 (514)                    | 31430 (45.2%)            | 276 (12)                            | 3348 (501)                    |
| Rural                            | 79708 (25.3%)       | 276 (12)                            | 3329 (512)                    | 19517 (28.1%)            | 276 (12)                            | 3354 (506)                    |
| <b>Language region</b>           |                     |                                     |                               |                          |                                     |                               |
| German                           | 223586 (70.9%)      | 276 (12)                            | 3348 (515)                    | 46546 (67%)              | 276 (12)                            | 3370 (502)                    |
| French                           | 80068 (25.4%)       | 275 (12)                            | 3283 (512)                    | 19324 (27.8%)            | 275 (11)                            | 3310 (502)                    |
| Italian                          | 11523 (3.7%)        | 275 (12)                            | 3252 (494)                    | 3593 (5.2%)              | 275 (12)                            | 3273 (494)                    |

**Table 2. Associations of mean gestational age at birth and mean birth weight with pregnancy, parental and environmental factors from adjusted linear mixed-effects model (model 3).**

|                                               | Gestational age (days)        |                          | Birth weight (g) *                   |                                      |
|-----------------------------------------------|-------------------------------|--------------------------|--------------------------------------|--------------------------------------|
|                                               | Absolute differences (95% CI) |                          | Relative differences (95% CI)        |                                      |
|                                               | Eligible population           | Complete case population | Eligible population                  | Complete case population             |
| Intercept                                     | 277.3 (277.2 to 277.5)        | 278.0 (277.7 to 278.3)   | 3276 (3215 to 3337) <sup>&amp;</sup> | 3294 (3167 to 3426) <sup>&amp;</sup> |
| <b>Sex</b>                                    |                               |                          |                                      |                                      |
| Female                                        | 0                             | 0                        | 1                                    | 1                                    |
| Male                                          | -0.56 (-0.65 to -0.48)        | -0.61 (-0.79 to -0.44)   | 1.045 (1.044 to 1.046)               | 1.048 (1.046 to 1.050)               |
| <b>Birth rank</b>                             |                               |                          |                                      |                                      |
| 1 <sup>¶</sup>                                | 0                             | 0                        | 1                                    | 1                                    |
| 2                                             | -0.44 (-0.54 to -0.33)        | -0.42 (-0.61 to -0.23)   | 1.037 (1.036 to 1.038)               | 1.038 (1.036 to 1.040)               |
| 3                                             | -0.28 (-0.44 to -0.11)        | -0.18 (-0.47 to 0.11)    | 1.050 (1.048 to 1.051)               | 1.053 (1.050 to 1.056)               |
| ≥ 4                                           | 0.15 (-0.14 to 0.43)          | 0.56 (0.03 to 1.08)      | 1.058 (1.055 to 1.061)               | 1.064 (1.059 to 1.070)               |
| <i>missing (not married)</i>                  | -0.11 (-0.24 to 0.01)         | -                        | 1.003 (1.002 to 1.004)               | -                                    |
| <b>Maternal age (yrs)</b>                     |                               |                          |                                      |                                      |
| < 20                                          | -3.92 (-5.41 to -2.44)        | -                        | 0.980 (0.965 to 0.994)               | -                                    |
| [20-30] <sup>¶</sup>                          | 0                             | 0                        | 1                                    | 1                                    |
| [30-40]                                       | -1.01 (-1.09 to -0.94)        | -1.04 (-1.19 to -0.88)   | 1.002 (1.001 to 1.003)               | 0.999 (0.998 to 1.001)               |
| ≥ 40                                          | -2.94 (-3.36 to -2.51)        | -3.61 (-4.51 to -2.71)   | 1.000 (0.996 to 1.004)               | 1.003 (0.993 to 1.012)               |
| <b>Nationality mother</b>                     |                               |                          |                                      |                                      |
| Switzerland <sup>¶</sup>                      | 0                             | 0                        | 1                                    | 1                                    |
| S Europe                                      | 0.21 (0.01 to 0.41)           | 0.37 (-0.06 to 0.80)     | 0.994 (0.992 to 0.996)               | 0.995 (0.991 to 1.000)               |
| W Europe                                      | 0.21 (0.03 to 0.39)           | 0.04 (-0.35 to 0.42)     | 1.007 (1.005 to 1.009)               | 1.006 (1.002 to 1.009)               |
| N Europe                                      | 0.38 (-0.06 to 0.82)          | 0.09 (-0.85 to 1.04)     | 1.024 (1.019 to 1.028)               | 1.026 (1.016 to 1.036)               |
| E Europe                                      | 0.21 (0.04 to 0.38)           | 0.35 (0.00 to 0.71)      | 1.013 (1.011 to 1.014)               | 1.017 (1.014 to 1.021)               |
| Other                                         | -0.32 (-0.50 to -0.15)        | -0.58 (-0.96 to -0.19)   | 1.007 (1.006 to 1.009)               | 1.010 (1.006 to 1.014)               |
| <b>Nationality father</b>                     |                               |                          |                                      |                                      |
| Switzerland <sup>¶</sup>                      | 0                             | 0                        | 1                                    | 1                                    |
| S Europe                                      | -0.46 (-0.64 to -0.27)        | -0.15 (-0.52 to 0.23)    | 0.992 (0.990 to 0.993)               | 0.992 (0.988 to 0.996)               |
| W Europe                                      | 0.08 (-0.10 to 0.25)          | 0.07 (-0.31 to 0.45)     | 1.007 (1.006 to 1.009)               | 1.006 (1.002 to 1.010)               |
| N Europe                                      | 0.52 (0.09 to 0.95)           | -0.10 (-1.04 to 0.83)    | 1.012 (1.008 to 1.017)               | 1.011 (1.001 to 1.020)               |
| E Europe                                      | -0.47 (-0.65 to -0.29)        | 0.04 (-0.33 to 0.42)     | 1.009 (1.008 to 1.011)               | 1.012 (1.008 to 1.016)               |
| Other                                         | -0.03 (-0.23 to 0.17)         | 0.42 (-0.02 to 0.87)     | 0.994 (0.992 to 0.996)               | 0.991 (0.986 to 0.995)               |
| <i>missing</i>                                | -3.88 (-4.25 to -3.52)        | -                        | 0.989 (0.985 to 0.993)               | -                                    |
| <b>Education mother</b>                       |                               |                          |                                      |                                      |
| Tertiary <sup>¶</sup>                         |                               | 0                        |                                      | 1                                    |
| Secondary                                     |                               | -0.56 (-0.76 to -0.35)   |                                      | 0.997 (0.995 to 0.999)               |
| Compulsory                                    |                               | -0.90 (-1.24 to -0.56)   |                                      | 0.993 (0.990 to 0.997)               |
| <b>Education father</b>                       |                               |                          |                                      |                                      |
| Tertiary <sup>¶</sup>                         |                               | 0                        |                                      | 1                                    |
| Secondary                                     |                               | -0.14 (-0.35 to 0.06)    |                                      | 0.997 (0.995 to 0.999)               |
| Compulsory                                    |                               | -0.38 (-0.73 to -0.04)   |                                      | 0.997 (0.994 to 1.001)               |
| <b>Altitude (m)</b>                           |                               |                          |                                      |                                      |
| 500 <sup>¶</sup>                              | 0                             | 0                        | 1                                    | 1                                    |
| per 500 m increase                            | 0.07 (-0.09 to 0.22)          | 0.04 (-0.24 to 0.32)     | 0.989 (0.988 to 0.991)               | 0.988 (0.985 to 0.991)               |
| <b>Urbanisation</b>                           |                               |                          |                                      |                                      |
| Urban <sup>¶</sup>                            | 0                             | 0                        | 1                                    | 1                                    |
| Peri-urban                                    | -0.43 (-0.57 to -0.28)        | -0.51 (-0.75 to -0.27)   | 1.001 (1.000 to 1.003)               | 1.002 (1.000 to 1.005)               |
| Rural                                         | -0.16 (-0.33 to 0.00)         | -0.18 (-0.45 to 0.10)    | 1.001 (0.999 to 1.002)               | 1.003 (1.001 to 1.006)               |
| <b>Language region</b>                        |                               |                          |                                      |                                      |
| German <sup>¶</sup>                           | 0                             | 0                        | 1                                    | 1                                    |
| French                                        | -0.62 (-0.77 to -0.47)        | -0.66 (-0.88 to -0.43)   | 0.989 (0.988 to 0.99)                | 0.989 (0.987 to 0.991)               |
| Italian                                       | -0.94 (-1.26 to -0.63)        | -1.29 (-1.75 to -0.84)   | 0.982 (0.98 to 0.985)                | 0.983 (0.979 to 0.988)               |
| <b>Percent of spatial variance explained†</b> | 31%                           | 41%                      | 87%                                  | 82%                                  |

\*Birth weight was modeled on a log scale, which results in multiplicative effects. The model for birth weight was additionally adjusted for gestational age by a cubic spline function with knots at weeks 25, 30 and 35.

<sup>&</sup> In the model for BW, the intercept corresponds to an estimated mean birth weight (g) for a singleton girl born at gestational age 40 weeks as the first child (rank 1) in a German-speaking, urban region of elevation 500m, whose mother is 20-30 years old at birth and married, and both parents have Swiss nationality and tertiary education.

<sup>¶</sup> Reference category

<sup>†</sup> Percentage of regional variance explained by model predictors, i.e. percent reduction in variance of random effects ( $\sigma^2$ ) when compared to model with no predictors (model 0).

**Table 3. Percentage of spatial variation explained by each individual variable and explained in addition after adjusting for all other variables.**

| Spatial variation explained               |                                  | Gestational age     |                          | Birth weight        |                          |
|-------------------------------------------|----------------------------------|---------------------|--------------------------|---------------------|--------------------------|
|                                           |                                  | Eligible population | Complete case population | Eligible population | Complete case population |
| <b>By single variables</b>                |                                  |                     |                          |                     |                          |
| <b>Pregnancy factors</b>                  | Gestational age                  | -                   | -                        | 27%                 | 31%                      |
|                                           | Sex                              | 0%                  | 0%                       | 1%                  | 3%                       |
|                                           | Birth rank                       | -                   | 0%                       | -                   | 3%                       |
|                                           | Birth rank missing (not married) | 0%                  | -                        | 12%                 | -                        |
| <b>Parental factors</b>                   | Maternal age                     | 0%                  | 4%                       | 1%                  | 1%                       |
|                                           | Nationality mother               | 1%                  | 3%                       | 17%                 | 19%                      |
|                                           | Nationality father               | -                   | 4%                       | -                   | 21%                      |
|                                           | Missing data on father           | 3%                  | -                        | 25%                 | -                        |
|                                           | Nationality parents*             | 3%                  | 5%                       | 27%                 | 24%                      |
|                                           | Education mother                 | -                   | 0%                       | -                   | 0%                       |
|                                           | Education father                 | -                   | 1%                       | -                   | 1%                       |
| Education parents*                        | -                                | 0%                  | -                        | 1%                  |                          |
| <b>Regional factors</b>                   | Altitude                         | 0%                  | 0%                       | 10%                 | 6%                       |
|                                           | Urbanisation                     | 10%                 | 9%                       | 0%                  | 0%                       |
|                                           | Language region                  | 23%                 | 33%                      | 62%                 | 60%                      |
| <b>In addition to all other variables</b> |                                  |                     |                          |                     |                          |
| <b>Pregnancy factors</b>                  | Gestational age                  | -                   | -                        | 11%                 | 5%                       |
|                                           | Sex                              | 0%                  | 0%                       | 0%                  | 1%                       |
|                                           | Birth rank                       | -                   | 0%                       | -                   | 3%                       |
|                                           | Birth rank missing (not married) | 0%                  | -                        | 4%                  | -                        |
| <b>Parental factors</b>                   | Maternal age                     | 0%                  | 1.5%                     | 1%                  | 0%                       |
|                                           | Nationality mother               | 0%                  | 0%                       | 0.5%                | 2%                       |
|                                           | Nationality father               | -                   | 0%                       | -                   | 0%                       |
|                                           | Missing data on father           | 1.5%                | -                        | 0.5%                | -                        |
|                                           | Nationality parents*             | 2.5%                | 0%                       | 2.5%                | 4%                       |
|                                           | Education mother                 | -                   | 1.5%                     | -                   | 0%                       |
|                                           | Education father                 | -                   | 0%                       | -                   | 0%                       |
| Education parents*                        | -                                | 1.5%                | -                        | 0.5%                |                          |
| <b>Regional Factors</b>                   | Altitude                         | 0%                  | 0%                       | 9%                  | 6%                       |
|                                           | Urbanisation                     | 9%                  | 7%                       | 0%                  | 1%                       |
|                                           | Language region                  | 19%                 | 26%                      | 21%                 | 21%                      |
| Model 3 (full)                            |                                  | 31%                 | 42%                      | 87%                 | 82%                      |

-, data not available; \*, nationality or educational attainment of mother and father were entered into the model.

## FIGURE LEGENDS

**Figure 1.** Maps of average gestational age (upper two panels) and birth weight (lower two panels) observed across 705 Swiss areas. Left: all eligible live births (n=315,177), right: complete case population (n=69,463).

**Figure 2.** Maps of gestational age and birth weight from crude model (model 0) and multivariable linear mixed-effect models (models 1-3) with percent reduction in the regional variation, represented by random effects. Analyses based on complete case population (N = 69,463).

## FOOTNOTES

**Contributors:** ME and CEK conceived the study and obtained funding. VS, ME, MZ and CEK developed the analysis plan. VS did all statistical analyses and wrote the first draft of the paper, which was revised by ME taking into account the critical comments from all authors. ME supervised the study. All authors approved the final version of the report.

**Funding:** The Swiss National Cohort is funded by the Swiss National Science Foundation (SNSF) cohort grant No. 148415. The current analysis was funded by SNSF project grant No. 163452. ME was supported by special SNSF project funding (grant No. 174281).

**Competing interests:** None declared.

**Patient consent:** Not required.

**Ethics approval:** The SNC has been approved by the Ethics Committee of the Canton of Bern.

**Provenance and peer review:** Not commissioned; externally peer reviewed.

**Data sharing statement:** Data are available within the framework of a data sharing agreement.



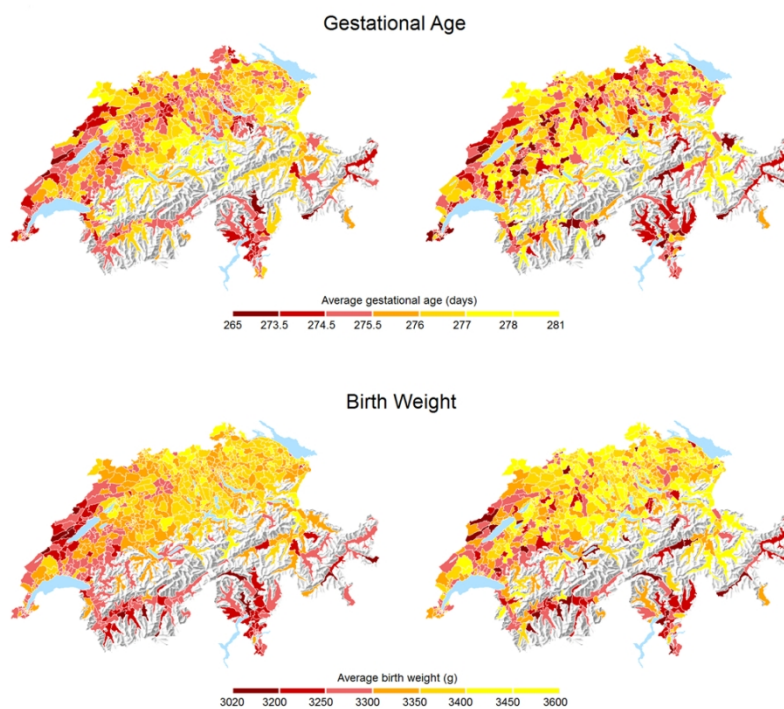

31 Figure 1. Maps of average gestational age (upper two panels) and birth weight (lower two panels) observed  
32 across 705 Swiss areas. Left: all eligible live births (n=315,177), right: complete case population  
33 (n=69,463).

34 338x254mm (96 x 96 DPI)

35  
36  
37  
38  
39  
40  
41  
42  
43  
44  
45  
46  
47  
48  
49  
50  
51  
52  
53  
54  
55  
56  
57  
58  
59  
60



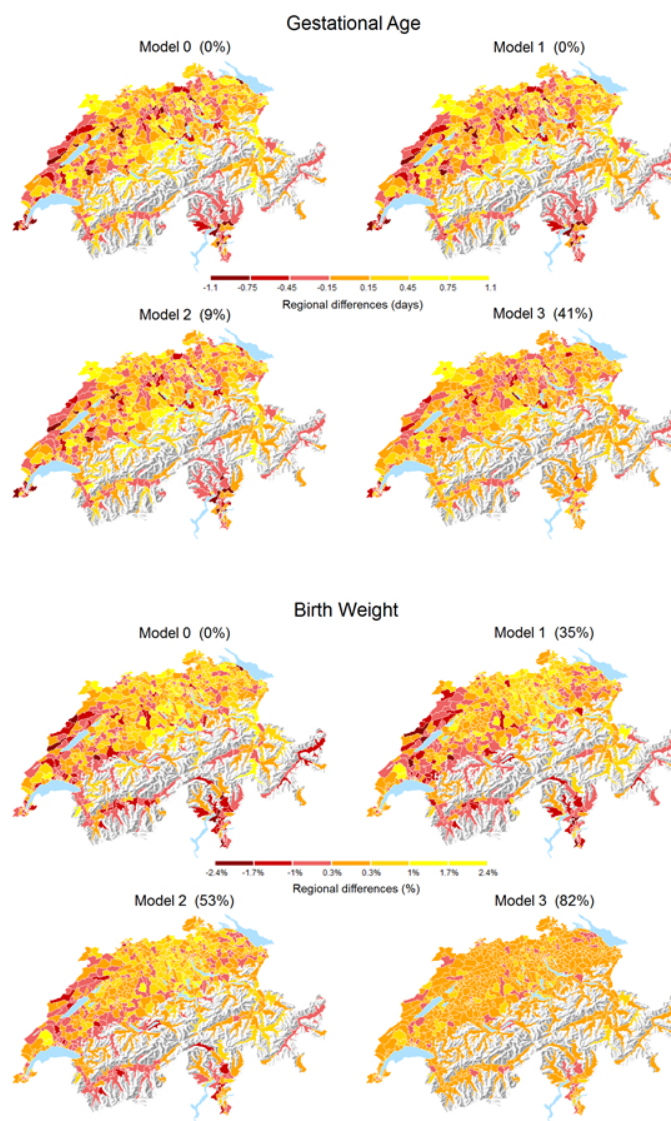

45 Figure 2. Maps of gestational age and birth weight from crude model (model 0) and multivariable linear  
46 mixed-effect models (models 1-3) with percent reduction in the regional variation, represented by random  
47 effects. Analyses based on complete case population (N = 69,463).

48 190x254mm (96 x 96 DPI)

**Supplementary Table S1. Number of live births, mean gestational age and mean birth weight by maternal nationality in the eligible population (N = 315'177).**

| Nationality               | N              | Gestational age (days) | Birth weight (g)  |            |
|---------------------------|----------------|------------------------|-------------------|------------|
|                           |                | Mean (SD)              | Mean (SD)         |            |
| Switzerland               | 194,570        | 276 (12)               | 3322 (511)        |            |
| <b>Southern Europe</b>    |                |                        |                   |            |
| Andorra                   | 1              | 279 (-)                | 3080 (-)          |            |
| Italy                     | 8337           | 275 (12)               | 3271 (496)        |            |
| Malta                     | 13             | 273 (8)                | 3188 (427)        |            |
| Portugal                  | 12,368         | 276 (12)               | 3235 (493)        |            |
| San Marino                | 2              | 274 (1.4)              | 3485 (120)        |            |
| Spain                     | 2864           | 276 (12)               | 3263 (488)        |            |
| <b>Western Europe</b>     |                |                        |                   |            |
| Austria                   | 1555           | 275 (14)               | 3328 (528)        |            |
| Belgium                   | 583            | 276 (12)               | 3357 (482)        |            |
| Germany                   | 16,736         | 276 (13)               | 3369 (517)        |            |
| France                    | 6173           | 276 (12)               | 3294 (505)        |            |
| Lichtenstein              | 100            | 275 (11)               | 3369 (488)        |            |
| Luxembourg                | 55             | 276 (19)               | 3396 (636)        |            |
| Netherlands               | 803            | 276 (12)               | 3377 (529)        |            |
| <b>Northern Europe</b>    |                |                        |                   |            |
| Denmark                   | 271            | 276 (13)               | 3383 (511)        |            |
| Estonia                   | 81             | 279 (7)                | 3601 (466)        |            |
| Finland                   | 312            | 276 (11)               | 3465 (523)        |            |
| Ireland                   | 212            | 276 (16)               | 3446 (548)        |            |
| Iceland                   | 31             | 272 (25)               | 3180 (775)        |            |
| Latvia                    | 187            | 279 (9)                | 3493 (434)        |            |
| Lithuania                 | 152            | 277 (13)               | 3450 (535)        |            |
| Norway                    | 110            | 275 (11)               | 3390 (525)        |            |
| Sweden                    | 571            | 276 (12)               | 3422 (470)        |            |
| UK                        | 1768           | 276 (13)               | 3397 (513)        |            |
| <b>Eastern Europe</b>     |                |                        |                   |            |
| Czech Republic            | 623            | 275 (12)               | 3339 (499)        |            |
| Hungary                   | 913            | 275 (13)               | 3341 (512)        |            |
| Poland                    | 1778           | 276 (12)               | 3399 (497)        |            |
| Slovakia                  | 1068           | 276 (12)               | 3348 (509)        |            |
| Albania                   | 209            | 276 (12)               | 3406 (476)        |            |
| Bosnia & Herzegovina      | 1952           | 276 (12)               | 3466 (492)        |            |
| Croatia                   | 1582           | 276 (12)               | 3448 (540)        |            |
| Kosovo                    | 10,278         | 276 (13)               | 3421 (530)        |            |
| Macedonia                 | 5842           | 276 (13)               | 3392 (514)        |            |
| Montenegro                | 212            | 276 (10)               | 3416 (466)        |            |
| Serbia                    | 5195           | 276 (13)               | 3400 (536)        |            |
| Serbia & Montenegro       | 10             | 277 (8)                | 3637 (250)        |            |
| Slovenia                  | 163            | 275 (15)               | 3366 (589)        |            |
| Cyprus                    | 15             | 278 (8)                | 3411 (525)        |            |
| Bulgaria                  | 406            | 273 (15)               | 3291 (559)        |            |
| Greece                    | 375            | 274 (13)               | 3317 (516)        |            |
| Romania                   | 971            | 274 (14)               | 3284 (537)        |            |
| Turkey                    | 4441           | 275 (13)               | 3347 (523)        |            |
| Belarus                   | 172            | 277 (13)               | 3385 (508)        |            |
| Moldova                   | 135            | 276 (10)               | 3496 (515)        |            |
| Russia                    | 1567           | 277 (12)               | 3427 (513)        |            |
| Ukraine                   | 855            | 277 (11)               | 3412 (473)        |            |
| <b>Other (non-Europe)</b> |                |                        |                   |            |
| 6 most numerous:          | Eritrea        | 2600                   | 279 (14)          | 3380 (528) |
|                           | Brazil         | 2381                   | 274 (12)          | 3312 (498) |
|                           | Sri Lanka      | 1391                   | 273 (14)          | 3158 (553) |
|                           | USA            | 1291                   | 276 (14)          | 3378 (532) |
|                           | China          | 1293                   | 276 (13)          | 3425 (541) |
|                           | Morocco        | 1159                   | 276 (14)          | 3378 (536) |
|                           | ...            |                        |                   |            |
| <b>Total</b>              | <b>315,177</b> | <b>276 (12)</b>        | <b>3328 (515)</b> |            |

**Supplementary Table S2. Comparison of results from fully adjusted model (model 3) accounting and not accounting for spatial autocorrelation. Based on complete-case population (N = 69'463).**

|                           | Accounting for spatial autocorrelation                     |                                                        | Not accounting for spatial autocorrelation                 |                                                        |
|---------------------------|------------------------------------------------------------|--------------------------------------------------------|------------------------------------------------------------|--------------------------------------------------------|
|                           | Gestational age (days)<br>Absolute differences<br>(95% CI) | Birth weight (g) *<br>Relative differences<br>(95% CI) | Gestational age (days)<br>Absolute differences<br>(95% CI) | Birth weight (g) *<br>Relative differences<br>(95% CI) |
| Intercept                 | 277.9 (277.6, 278.2)                                       | 3289 (3159, 3423)                                      | 278.0 (277.7 to 278.3)                                     | 3294 (3167 to 3426) <sup>&amp;</sup>                   |
| <b>Sex</b>                |                                                            |                                                        |                                                            |                                                        |
| Female                    | 0                                                          | 1                                                      | 0                                                          | 1                                                      |
| Male                      | -0.61 (-0.79, -0.44)                                       | 1.048 (1.046, 1.049)                                   | -0.61 (-0.79 to -0.44)                                     | 1.048 (1.046 to 1.050)                                 |
| <b>Birth rank</b>         |                                                            |                                                        |                                                            |                                                        |
| 1 <sup>†</sup>            | 0                                                          | 1                                                      | 0                                                          | 1                                                      |
| 2                         | -0.42 (-0.61, -0.23)                                       | 1.038 (1.036, 1.040)                                   | -0.42 (-0.61 to -0.23)                                     | 1.038 (1.036 to 1.040)                                 |
| 3                         | -0.18 (-0.47, 0.11)                                        | 1.053 (1.050, 1.056)                                   | -0.18 (-0.47 to 0.11)                                      | 1.053 (1.050 to 1.056)                                 |
| ≥ 4                       | 0.55 (0.03, 1.08)                                          | 1.064 (1.059, 1.070)                                   | 0.56 (0.03 to 1.08)                                        | 1.064 (1.059 to 1.070)                                 |
| <b>Maternal age (yrs)</b> |                                                            |                                                        |                                                            |                                                        |
| [20-30] <sup>‡</sup>      | 0                                                          | 1                                                      | 0                                                          | 1                                                      |
| [30-40]                   | -1.03 (-1.19, -0.87)                                       | 0.999 (0.997, 1.001)                                   | -1.04 (-1.19 to -0.88)                                     | 0.999 (0.998 to 1.001)                                 |
| ≥ 40                      | -3.61 (-4.52, -2.71)                                       | 1.003 (0.993, 1.012)                                   | -3.61 (-4.51 to -2.71)                                     | 1.003 (0.993 to 1.012)                                 |
| <b>Nationality mother</b> |                                                            |                                                        |                                                            |                                                        |
| Switzerland <sup>‡</sup>  | 0                                                          | 1                                                      | 0                                                          | 1                                                      |
| S Europe                  | 0.37 (-0.07, 0.80)                                         | 0.995 (0.991, 1.000)                                   | 0.37 (-0.06 to 0.80)                                       | 0.995 (0.991 to 1.000)                                 |
| W Europe                  | 0.03 (-0.35, 0.42)                                         | 1.005 (1.001, 1.009)                                   | 0.04 (-0.35 to 0.42)                                       | 1.006 (1.002 to 1.009)                                 |
| N Europe                  | 0.10 (-0.85, 1.05)                                         | 1.025 (1.015, 1.035)                                   | 0.09 (-0.85 to 1.04)                                       | 1.026 (1.016 to 1.036)                                 |
| E Europe                  | 0.35 (0.00, 0.71)                                          | 1.017 (1.013, 1.021)                                   | 0.35 (0.00 to 0.71)                                        | 1.017 (1.014 to 1.021)                                 |
| Other                     | -0.56 (-0.95, -0.18)                                       | 1.010 (1.006, 1.014)                                   | -0.58 (-0.96 to -0.19)                                     | 1.010 (1.006 to 1.014)                                 |
| <b>Nationality father</b> |                                                            |                                                        |                                                            |                                                        |
| Switzerland <sup>‡</sup>  | 0                                                          | 1                                                      | 0                                                          | 1                                                      |
| S Europe                  | -0.14 (-0.52, 0.23)                                        | 0.992 (0.988, 0.995)                                   | -0.15 (-0.52 to 0.23)                                      | 0.992 (0.988 to 0.996)                                 |
| W Europe                  | 0.07 (-0.31, 0.45)                                         | 1.006 (1.002, 1.010)                                   | 0.07 (-0.31 to 0.45)                                       | 1.006 (1.002 to 1.010)                                 |
| N Europe                  | -0.08 (-1.02, 0.85)                                        | 1.010 (1.001, 1.020)                                   | -0.10 (-1.04 to 0.83)                                      | 1.011 (1.001 to 1.020)                                 |
| E Europe                  | 0.04 (-0.34, 0.42)                                         | 1.011 (1.007, 1.015)                                   | 0.04 (-0.33 to 0.42)                                       | 1.012 (1.008 to 1.016)                                 |
| Other                     | 0.44 (-0.01, 0.89)                                         | 0.991 (0.986, 0.995)                                   | 0.42 (-0.02 to 0.87)                                       | 0.991 (0.986 to 0.995)                                 |
| <b>Education mother</b>   |                                                            |                                                        |                                                            |                                                        |
| Tertiary <sup>‡</sup>     | 0                                                          | 1                                                      | 0                                                          | 1                                                      |
| Secondary                 | -0.56 (-0.77, -0.36)                                       | 0.997 (0.995, 0.999)                                   | -0.56 (-0.76 to -0.35)                                     | 0.997 (0.995 to 0.999)                                 |
| Compulsory                | -0.91 (-1.25, -0.57)                                       | 0.994 (0.990, 0.997)                                   | -0.90 (-1.24 to -0.56)                                     | 0.993 (0.990 to 0.997)                                 |
| <b>Education father</b>   |                                                            |                                                        |                                                            | *                                                      |
| Tertiary <sup>‡</sup>     | 0                                                          | 1                                                      | 0                                                          | 1                                                      |
| Secondary                 | -0.14 (-0.35, 0.06)                                        | 0.997 (0.995, 0.999)                                   | -0.14 (-0.35 to 0.06)                                      | 0.997 (0.995 to 0.999)                                 |
| Compulsory                | -0.39 (-0.73, -0.04)                                       | 0.997 (0.994, 1.001)                                   | -0.38 (-0.73 to -0.04)                                     | 0.997 (0.994 to 1.001)                                 |
| <b>Altitude (m)</b>       |                                                            |                                                        |                                                            |                                                        |
| 500 <sup>‡</sup>          | 0                                                          | 1                                                      | 0                                                          | 1                                                      |
| per 500 m increase        | -0.01 (-0.31, 0.29)                                        | 0.989 (0.985, 0.993)                                   | 0.04 (-0.24 to 0.32)                                       | 0.988 (0.985 to 0.991)                                 |
| <b>Urbanisation</b>       |                                                            |                                                        |                                                            |                                                        |
| Urban <sup>‡</sup>        | 0                                                          | 1                                                      | 0                                                          | 1                                                      |
| Peri-urban                | -0.49 (-0.73, -0.25)                                       | 1.001 (0.998, 1.004)                                   | -0.51 (-0.75 to -0.27)                                     | 1.002 (1.000 to 1.005)                                 |
| Rural                     | -0.19 (-0.47, 0.09)                                        | 1.002 (0.998, 1.006)                                   | -0.18 (-0.45 to 0.10)                                      | 1.003 (1.001 to 1.006)                                 |
| <b>Language region</b>    |                                                            |                                                        |                                                            |                                                        |
| German <sup>‡</sup>       | 0                                                          | 1                                                      | 0                                                          | 1                                                      |
| French                    | -0.41 (-0.77, -0.05)                                       | 0.992 (0.984, 1.000)                                   | -0.66 (-0.88 to -0.43)                                     | 0.989 (0.987 to 0.991)                                 |
| Italian                   | -1.29 (-1.75, -0.83)                                       | 0.984 (0.978, 0.990)                                   | -1.29 (-1.75 to -0.84)                                     | 0.983 (0.979 to 0.988)                                 |

\*Birth weight was modeled on a log scale, which results in multiplicative effects. The model for birth weight was additionally adjusted for gestational age by a cubic spline function with knots at weeks 25, 30 and 35.

<sup>&</sup> In the model for BW, the intercept corresponds to an estimated mean birth weight (g) for a singleton girl born at gestational age 40 weeks as the first child (rank 1) in a German-speaking, urban region of elevation 500m, whose mother is 20-30 years old at birth and married, and both parents have Swiss nationality and tertiary education.

<sup>‡</sup> Reference category

<sup>†</sup> Percentage of regional variance explained by model predictors, i.e. percent reduction in variance of random effects ( $\sigma^2$ ) when compared to model with no predictors (model 0).

**Supplementary Table S3. Comparison of results from model (model 3) for birth weight, adjusted and not adjusted for gestational age.**

|                                  | Birth weight - Model 3 without Gestational Age |                      | Birth weight - Model 3 with Gestational Age* |                        |
|----------------------------------|------------------------------------------------|----------------------|----------------------------------------------|------------------------|
|                                  | Relative differences (95% CI)                  |                      |                                              |                        |
|                                  | Complete case population                       | Eligible population  | Complete case population                     | Eligible population    |
| <b>Intercept</b>                 | 3209 (3195, 3222)                              | 3186 (3179, 3193)    | 3294 (3167 to 3426)                          | 3276 (3215 to 3337)    |
| <b>Sex</b>                       |                                                |                      |                                              |                        |
| <sup>†</sup> Female              | 1                                              | 1                    | 1                                            | 1                      |
| Male                             | 1.042 (1.039, 1.044)                           | 1.040 (1.038, 1.041) | 1.048 (1.046 to 1.050)                       | 1.045 (1.044 to 1.046) |
| <b>Rank</b>                      |                                                |                      |                                              |                        |
| 1 <sup>‡</sup>                   | 1                                              | 1                    | 1                                            | 1                      |
| 2                                | 1.039 (1.036, 1.042)                           | 1.038 (1.036, 1.040) | 1.038 (1.036 to 1.040)                       | 1.037 (1.036 to 1.038) |
| 3                                | 1.057 (1.052, 1.062)                           | 1.052 (1.049, 1.055) | 1.053 (1.050 to 1.056)                       | 1.050 (1.048 to 1.051) |
| ≥ 4                              | 1.074 (1.065, 1.082)                           | 1.063 (1.058, 1.067) | 1.064 (1.059 to 1.070)                       | 1.058 (1.055 to 1.061) |
| missing (non-married)            | -                                              | 1.002 (1.000, 1.003) | -                                            | 1.003 (1.002 to 1.004) |
| <b>Age mother (yrs)</b>          |                                                |                      |                                              |                        |
| < 20 yrs (per 5 yrs)             | -                                              | 0.934 (0.913, 0.955) | -                                            | 0.980 (0.965 to 0.994) |
| 20-30 yrs <sup>‡</sup>           | 1                                              | 1                    | 1                                            | 1                      |
| 30-40 yrs (per 5 yrs)            | 0.990 (0.988, 0.993)                           | 0.993 (0.992, 0.994) | 0.999 (0.998 to 1.001)                       | 1.002 (1.001 to 1.003) |
| > 40 yrs (per 5 yrs)             | 0.969 (0.956, 0.982)                           | 0.974 (0.968, 0.981) | 1.003 (0.993 to 1.012)                       | 1.000 (0.996 to 1.004) |
| <b>Nationality mother</b>        |                                                |                      |                                              |                        |
| Switzerland <sup>‡</sup>         | 1                                              | 1                    | 1                                            | 1                      |
| S Europe                         | 0.999 (0.992, 1.005)                           | 0.996 (0.993, 0.999) | 0.995 (0.991 to 1.000)                       | 0.994 (0.992 to 0.996) |
| W Europe                         | 1.006 (1.000, 1.012)                           | 1.009 (1.006, 1.012) | 1.006 (1.002 to 1.009)                       | 1.007 (1.005 to 1.009) |
| N Europe                         | 1.024 (1.010, 1.039)                           | 1.026 (1.019, 1.033) | 1.026 (1.016 to 1.036)                       | 1.024 (1.019 to 1.028) |
| E Europe                         | 1.020 (1.015, 1.026)                           | 1.014 (1.011, 1.016) | 1.017 (1.014 to 1.021)                       | 1.013 (1.011 to 1.014) |
| Other                            | 1.004 (0.998, 1.010)                           | 1.004 (1.001, 1.007) | 1.010 (1.006 to 1.014)                       | 1.007 (1.006 to 1.009) |
| <b>Nationality father</b>        |                                                |                      |                                              |                        |
| Switzerland <sup>‡</sup>         | 1                                              | 1                    | 1                                            | 1                      |
| S Europe                         | 0.992 (0.986, 0.998)                           | 0.988 (0.986, 0.991) | 0.992 (0.988 to 0.996)                       | 0.992 (0.990 to 0.993) |
| W Europe                         | 1.007 (1.001, 1.013)                           | 1.008 (1.005, 1.010) | 1.006 (1.002 to 1.010)                       | 1.007 (1.006 to 1.009) |
| N Europe                         | 1.008 (0.994, 1.022)                           | 1.016 (1.010, 1.023) | 1.011 (1.001 to 1.020)                       | 1.012 (1.008 to 1.017) |
| E Europe                         | 1.011 (1.005, 1.017)                           | 1.004 (1.001, 1.007) | 1.012 (1.008 to 1.016)                       | 1.009 (1.008 to 1.011) |
| Other                            | 0.995 (0.989, 1.002)                           | 0.991 (0.989, 0.994) | 0.991 (0.986 to 0.995)                       | 0.994 (0.992 to 0.996) |
| missing                          | -                                              | 0.933 (0.928, 0.938) | -                                            | 0.989 (0.985 to 0.993) |
| <b>Education mother</b>          |                                                |                      |                                              |                        |
| Tertiary <sup>‡</sup>            | 1                                              |                      | 1                                            |                        |
| Secondary                        | 0.993 (0.990, 0.996)                           |                      | 0.997 (0.995 to 0.999)                       |                        |
| Compulsory                       | 0.984 (0.979, 0.989)                           |                      | 0.993 (0.990 to 0.997)                       |                        |
| <b>Education father</b>          |                                                |                      |                                              |                        |
| Tertiary <sup>‡</sup>            | 1                                              |                      | 1                                            |                        |
| Secondary                        | 0.996 (0.993, 0.999)                           |                      | 0.997 (0.995 to 0.999)                       |                        |
| Compulsory                       | 0.994 (0.989, 1.000)                           |                      | 0.997 (0.994 to 1.001)                       |                        |
| <b>Altitude (m)</b>              |                                                |                      |                                              |                        |
| 500 m <sup>‡</sup>               | 1                                              | 1                    | 1                                            | 1                      |
| per 500 m increase               | 0.988 (0.984, 0.992)                           | 0.990 (0.988, 0.992) | 0.988 (0.985 to 0.991)                       | 0.989 (0.988 to 0.991) |
| <b>Urbanisation</b>              |                                                |                      |                                              |                        |
| Urban <sup>‡</sup>               | 1                                              | 1                    | 1                                            | 1                      |
| Peri-urban                       | 0.999 (0.996, 1.002)                           | 0.998 (0.996, 1.000) | 1.002 (1.000 to 1.005)                       | 1.001 (1.000 to 1.003) |
| Rural                            | 1.002 (0.998, 1.006)                           | 0.999 (0.997, 1.002) | 1.003 (1.001 to 1.006)                       | 1.001 (0.999 to 1.002) |
| <b>Language region</b>           |                                                |                      |                                              |                        |
| <sup>‡</sup> German <sup>‡</sup> | 1                                              | 1                    | 1                                            | 1                      |
| French                           | 0.985 (0.982, 0.988)                           | 0.985 (0.983, 0.987) | 0.989 (0.987 to 0.991)                       | 0.989 (0.988 to 0.99)  |
| Italian                          | 0.974 (0.968, 0.981)                           | 0.977 (0.973, 0.981) | 0.983 (0.979 to 0.988)                       | 0.982 (0.98 to 0.985)  |
| <b>% variation explained</b>     |                                                |                      |                                              |                        |
| Model 3                          | 77%                                            | 77%                  | 82%                                          | 87%                    |
| Model 2                          | 28%                                            | 30%                  | 53%                                          | 53%                    |
| Model 1                          | 6%                                             | 12%                  | 35%                                          | 35%                    |

\*Birth weight was modelled on a log scale, which results in multiplicative effects. The model was additionally adjusted for gestational age by a cubic spline function with knots at weeks 25, 30 and 35.

<sup>‡</sup> Reference category

† Percentage of regional variance explained by model predictors, i.e. percent reduction in variance of random effects ( $\sigma^2$ ) when compared to model with no predictors (model 0).

**Supplementary Figure S1. Selection of eligible and complete case study populations among live births in Switzerland 2011 to 2014.**

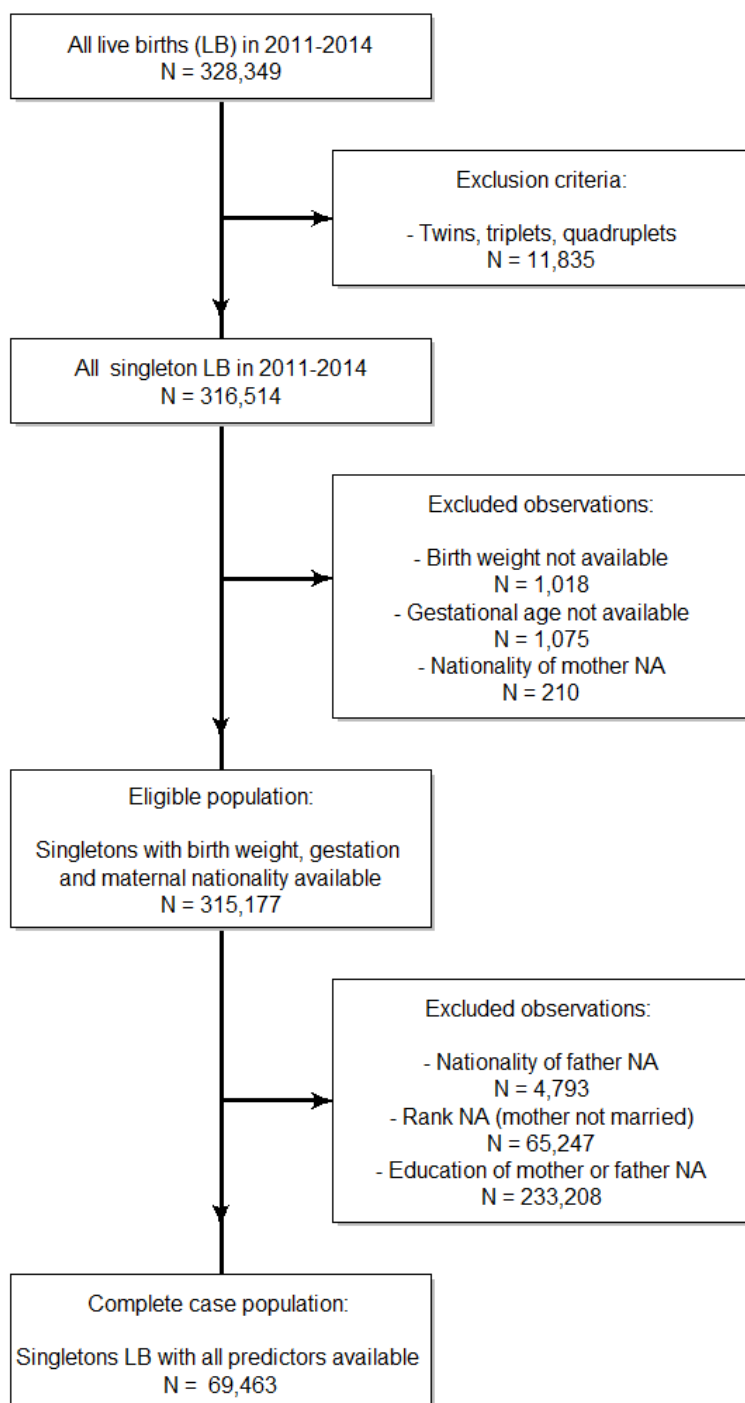

Supplementary Figure S2. Relationship between birth weight and gestational age at birth modeled by a cubic spline function. Separate fitted curves are shown for newborn girls and boys, with all other predictors corresponding to the reference categories shown in Table 2.

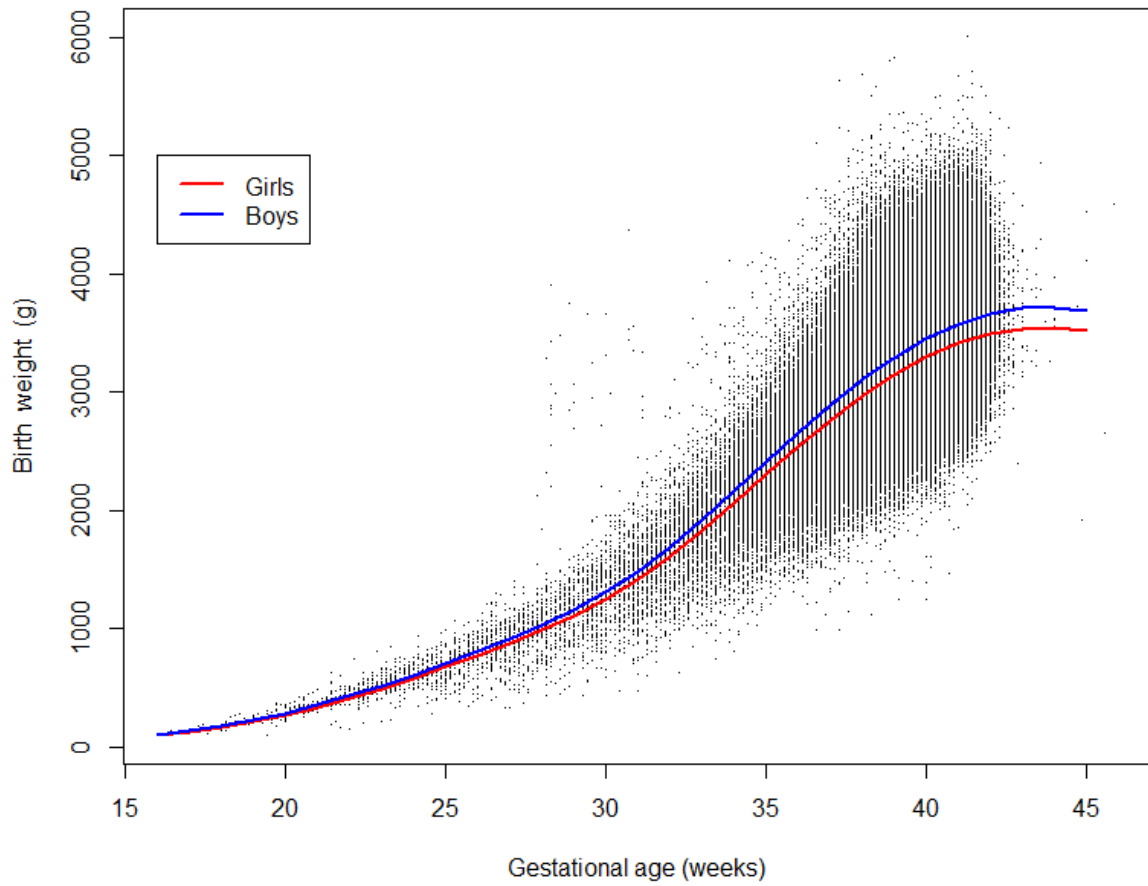

**Supplementary Figure S3. Relationship between mean gestational age and proportion of preterm live births (<37 weeks) among eligible live births across 705 regions (upper panel) and between mean birth weight and proportion of low birth weight births (<2500g) (lower panel).**

Results from linear regression weighted by the number of live births in each region. Prediction interval displayed for an average-size region (n=447). GA = gestational age; BW= birth weight

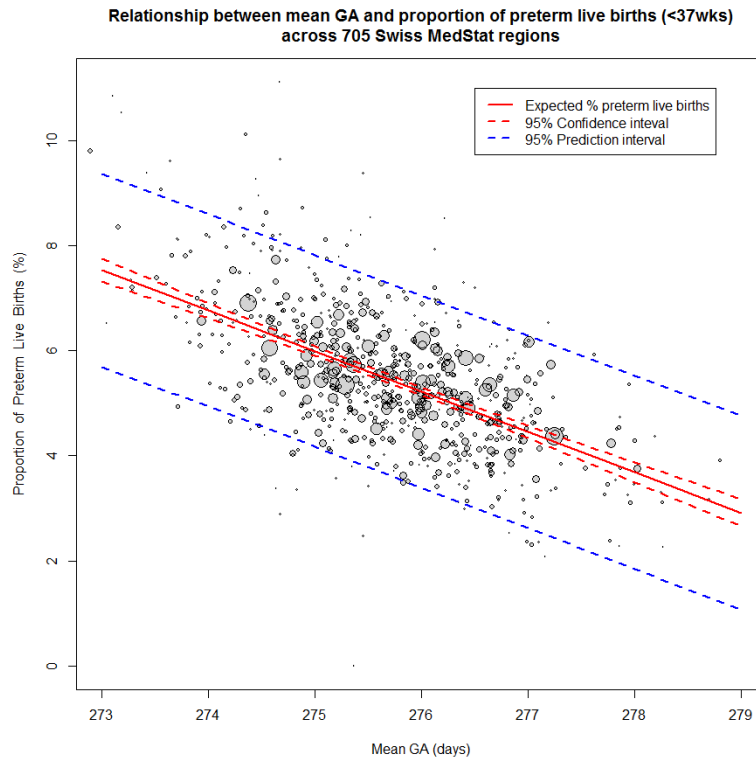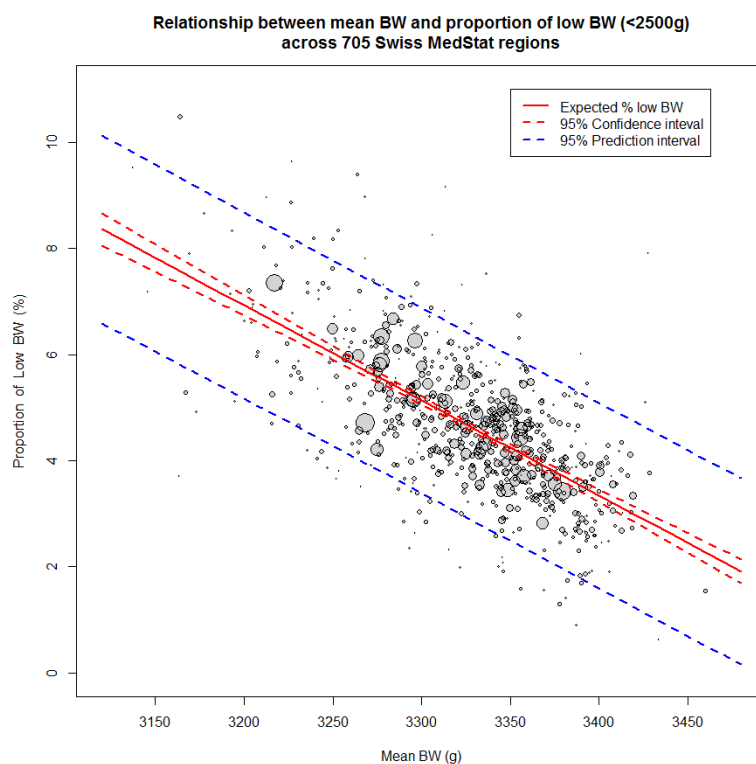



## STROBE Statement—checklist of items that should be included in reports of observational studies

|                              | Item No | Recommendation                                                                                                                                                                                                                                                                                                                                                                                                                                                         | Page No |
|------------------------------|---------|------------------------------------------------------------------------------------------------------------------------------------------------------------------------------------------------------------------------------------------------------------------------------------------------------------------------------------------------------------------------------------------------------------------------------------------------------------------------|---------|
| <b>Title and abstract</b>    | 1       | (a) Indicate the study's design with a commonly used term in the title or the abstract                                                                                                                                                                                                                                                                                                                                                                                 | 1       |
|                              |         | (b) Provide in the abstract an informative and balanced summary of what was done and what was found                                                                                                                                                                                                                                                                                                                                                                    | 2       |
| <b>Introduction</b>          |         |                                                                                                                                                                                                                                                                                                                                                                                                                                                                        |         |
| Background/rationale         | 2       | Explain the scientific background and rationale for the investigation being reported                                                                                                                                                                                                                                                                                                                                                                                   | 4       |
| Objectives                   | 3       | State specific objectives, including any prespecified hypotheses                                                                                                                                                                                                                                                                                                                                                                                                       | 4       |
| <b>Methods</b>               |         |                                                                                                                                                                                                                                                                                                                                                                                                                                                                        |         |
| Study design                 | 4       | Present key elements of study design early in the paper                                                                                                                                                                                                                                                                                                                                                                                                                | 5       |
| Setting                      | 5       | Describe the setting, locations, and relevant dates, including periods of recruitment, exposure, follow-up, and data collection                                                                                                                                                                                                                                                                                                                                        | 6       |
| Participants                 | 6       | (a) <i>Cohort study</i> —Give the eligibility criteria, and the sources and methods of selection of participants. Describe methods of follow-up<br><i>Case-control study</i> —Give the eligibility criteria, and the sources and methods of case ascertainment and control selection. Give the rationale for the choice of cases and controls<br><i>Cross-sectional study</i> —Give the eligibility criteria, and the sources and methods of selection of participants | 6       |
|                              |         | (b) <i>Cohort study</i> —For matched studies, give matching criteria and number of exposed and unexposed<br><i>Case-control study</i> —For matched studies, give matching criteria and the number of controls per case                                                                                                                                                                                                                                                 |         |
| Variables                    | 7       | Clearly define all outcomes, exposures, predictors, potential confounders, and effect modifiers. Give diagnostic criteria, if applicable                                                                                                                                                                                                                                                                                                                               | 5       |
| Data sources/<br>measurement | 8*      | For each variable of interest, give sources of data and details of methods of assessment (measurement). Describe comparability of assessment methods if there is more than one group                                                                                                                                                                                                                                                                                   | 5       |
| Bias                         | 9       | Describe any efforts to address potential sources of bias                                                                                                                                                                                                                                                                                                                                                                                                              | 7       |
| Study size                   | 10      | Explain how the study size was arrived at                                                                                                                                                                                                                                                                                                                                                                                                                              | 8       |
| Quantitative variables       | 11      | Explain how quantitative variables were handled in the analyses. If applicable, describe which groupings were chosen and why                                                                                                                                                                                                                                                                                                                                           | 6       |
| Statistical methods          | 12      | (a) Describe all statistical methods, including those used to control for confounding                                                                                                                                                                                                                                                                                                                                                                                  | 6       |
|                              |         | (b) Describe any methods used to examine subgroups and interactions                                                                                                                                                                                                                                                                                                                                                                                                    | na      |
|                              |         | (c) Explain how missing data were addressed                                                                                                                                                                                                                                                                                                                                                                                                                            | 8       |
|                              |         | (d) <i>Cohort study</i> —If applicable, explain how loss to follow-up was addressed<br><i>Case-control study</i> —If applicable, explain how matching of cases and controls was addressed<br><i>Cross-sectional study</i> —If applicable, describe analytical methods taking account of sampling strategy                                                                                                                                                              | na      |
|                              |         | (e) Describe any sensitivity analyses                                                                                                                                                                                                                                                                                                                                                                                                                                  | 7       |

Continued on next page



1  
2  
3  
4  
5  
6  
7  
8  
9  
10  
11  
12  
13  
14  
15  
16  
17  
18  
19  
20  
21  
22  
23  
24  
25  
26  
27  
28  
29  
30  
31  
32  
33  
34  
35  
36  
37  
38  
39  
40  
41  
42  
43  
44  
45  
46  
47  
48  
49  
50  
51  
52  
53  
54  
55  
56  
57  
58  
59  
60**Results**

|                  |     |                                                                                                                                                                                                              |                   |
|------------------|-----|--------------------------------------------------------------------------------------------------------------------------------------------------------------------------------------------------------------|-------------------|
| Participants     | 13* | (a) Report numbers of individuals at each stage of study—eg numbers potentially eligible, examined for eligibility, confirmed eligible, included in the study, completing follow-up, and analysed            | 8                 |
|                  |     | (b) Give reasons for non-participation at each stage                                                                                                                                                         | 8                 |
|                  |     | (c) Consider use of a flow diagram                                                                                                                                                                           | Figure S1         |
| Descriptive data | 14* | (a) Give characteristics of study participants (eg demographic, clinical, social) and information on exposures and potential confounders                                                                     | Table 1, Table S1 |
|                  |     | (b) Indicate number of participants with missing data for each variable of interest                                                                                                                          | Table 1           |
|                  |     | (c) <i>Cohort study</i> —Summarise follow-up time (eg, average and total amount)                                                                                                                             |                   |
| Outcome data     | 15* | <i>Cohort study</i> —Report numbers of outcome events or summary measures over time                                                                                                                          |                   |
|                  |     | <i>Case-control study</i> —Report numbers in each exposure category, or summary measures of exposure                                                                                                         |                   |
|                  |     | <i>Cross-sectional study</i> —Report numbers of outcome events or summary measures                                                                                                                           | Table 1           |
| Main results     | 16  | (a) Give unadjusted estimates and, if applicable, confounder-adjusted estimates and their precision (eg, 95% confidence interval). Make clear which confounders were adjusted for and why they were included | Table 2, Table S3 |
|                  |     | (b) Report category boundaries when continuous variables were categorized                                                                                                                                    | All tables        |
|                  |     | (c) If relevant, consider translating estimates of relative risk into absolute risk for a meaningful time period                                                                                             | na                |
| Other analyses   | 17  | Report other analyses done—eg analyses of subgroups and interactions, and sensitivity analyses                                                                                                               | Table S2, S3      |

**Discussion**

|                  |    |                                                                                                                                                                            |    |
|------------------|----|----------------------------------------------------------------------------------------------------------------------------------------------------------------------------|----|
| Key results      | 18 | Summarise key results with reference to study objectives                                                                                                                   | 11 |
| Limitations      | 19 | Discuss limitations of the study, taking into account sources of potential bias or imprecision. Discuss both direction and magnitude of any potential bias                 | 12 |
| Interpretation   | 20 | Give a cautious overall interpretation of results considering objectives, limitations, multiplicity of analyses, results from similar studies, and other relevant evidence | 12 |
| Generalisability | 21 | Discuss the generalisability (external validity) of the study results                                                                                                      | 12 |

**Other information**

|         |    |                                                                                                                                                               |    |
|---------|----|---------------------------------------------------------------------------------------------------------------------------------------------------------------|----|
| Funding | 22 | Give the source of funding and the role of the funders for the present study and, if applicable, for the original study on which the present article is based | 29 |
|---------|----|---------------------------------------------------------------------------------------------------------------------------------------------------------------|----|

\*Give information separately for cases and controls in case-control studies and, if applicable, for exposed and unexposed groups in cohort and cross-sectional studies.

**Note:** An Explanation and Elaboration article discusses each checklist item and gives methodological background and published examples of transparent reporting. The STROBE checklist is best used in conjunction with this article (freely available on the Web sites of PLoS Medicine at <http://www.plosmedicine.org/>, Annals of Internal Medicine at

1  
2 <http://www.annals.org/>, and *Epidemiology* at <http://www.epidem.com/>). Information on the STROBE Initiative is  
3 available at [www.strobe-statement.org](http://www.strobe-statement.org).  
4  
5  
6  
7  
8  
9  
10  
11  
12  
13  
14  
15  
16  
17  
18  
19  
20  
21  
22  
23  
24  
25  
26  
27  
28  
29  
30  
31  
32  
33  
34  
35  
36  
37  
38  
39  
40  
41  
42  
43  
44  
45  
46  
47  
48  
49  
50  
51  
52  
53  
54  
55  
56  
57  
58  
59  
60

For peer review only

# BMJ Open

## Spatial epidemiology of gestational age and birth weight in Switzerland: Census-based linkage study

|                                 |                                                                                                                                                                                                                                                                                                                                                                                                                                                                                    |
|---------------------------------|------------------------------------------------------------------------------------------------------------------------------------------------------------------------------------------------------------------------------------------------------------------------------------------------------------------------------------------------------------------------------------------------------------------------------------------------------------------------------------|
| Journal:                        | <i>BMJ Open</i>                                                                                                                                                                                                                                                                                                                                                                                                                                                                    |
| Manuscript ID                   | bmjopen-2018-027834.R1                                                                                                                                                                                                                                                                                                                                                                                                                                                             |
| Article Type:                   | Original research                                                                                                                                                                                                                                                                                                                                                                                                                                                                  |
| Date Submitted by the Author:   | 12-Jun-2019                                                                                                                                                                                                                                                                                                                                                                                                                                                                        |
| Complete List of Authors:       | Skrivankova, Veronika; Universitat Bern Institut fur Sozial- und Praventivmedizin, Zwahlen , Marcel; Universitat Bern Institut fur Sozial- und Praventivmedizin<br>Adams, Mark; University of Zurich, Department of Neonatology<br>Low, Nicola; University of Bern, Institute of Social and Preventive Medicine<br>Kuehni, Claudia; Universitat Bern Institut fur Sozial- und Praventivmedizin<br>Egger, Matthias; University of Bern, Institute of Social and Preventive Medicine |
| <b>Primary Subject Heading</b>: | Public health                                                                                                                                                                                                                                                                                                                                                                                                                                                                      |
| Secondary Subject Heading:      | Reproductive medicine, Obstetrics and gynaecology                                                                                                                                                                                                                                                                                                                                                                                                                                  |
| Keywords:                       | birth weight, gestational age, spatial epidemiology, Switzerland, socio-economic position, education                                                                                                                                                                                                                                                                                                                                                                               |
|                                 |                                                                                                                                                                                                                                                                                                                                                                                                                                                                                    |

SCHOLARONE™  
Manuscripts

1  
2  
3  
4  
5  
6  
7 **Spatial epidemiology of gestational age and birth weight in Switzerland:**  
8  
9 **Census-based linkage study**  
10  
11  
12  
13  
14

15 Veronika Skrivankova<sup>1</sup>, Marcel Zwahlen<sup>1</sup>, Mark Adams<sup>2</sup>, Nicola Low<sup>1</sup>,  
16  
17 Claudia E Kuehni<sup>1,3</sup>, Matthias Egger<sup>1</sup>  
18  
19  
20  
21  
22

23 1) Institute of Social and Preventive Medicine (ISPM), University of Bern, Bern, Switzerland  
24

25 2) Department of Neonatology, University Hospital Zurich, University of Zurich, Zurich,  
26  
27 Switzerland  
28

29 3) Pediatric Respiratory Medicine, Inselspital, Bern University Hospital, University of Bern,  
30  
31 Switzerland  
32  
33  
34  
35  
36  
37  
38  
39  
40  
41  
42  
43  
44

45 Correspondence to:  
46  
47  
48  
49  
50  
51  
52  
53  
54  
55

45 Professor Matthias Egger MD

46 Institute of Social and Preventive Medicine (ISPM), University of Bern

47 Mittelstrasse 43, CH-3012 Bern, Switzerland

48 matthias.egger@ispm.unibe.ch  
49  
50  
51  
52  
53  
54  
55

56 **Word counts:** Abstract 245 words, strengths and limitations of the study 129 words, main  
57 text 3484 words, 44 references, 3 tables, 2 figures, supplementary materials with 4 tables  
58 and 3 figures.  
59  
60

## ABSTRACT

**Background:** Gestational age and birth weight are strong predictors of infant morbidity and mortality. Understanding spatial variation can inform policies to reduce health inequalities. We examined small-area variation in gestational age and birth weight in Switzerland.

**Methods:** All singleton live births recorded in the Swiss Live Birth Register 2011 to 2014 were eligible. We deterministically linked the Live Birth Register with census and survey data to create datasets including neonatal and pregnancy-related variables, parental characteristics and geographical variables. We produced maps of 705 areas and fitted linear mixed-effect models to assess to what extent spatial variation was explained by these variables.

**Results:** We analysed all 315,177 eligible live births. Area-level averages of gestational age varied between 272-279 days, and between 3138-3467g for birth weight. The fully adjusted models explained 31% and 87% of spatial variation of gestational age and birth weight, respectively. Language region explained most of the variation, with shorter gestational age and lower birth weight in French- and Italian- than in German-speaking areas. Other variables explaining variation were, for gestational age, the level of urbanisation, the parents' nationality and missing father. For birth weight, they were gestational age, altitude, and parental nationality. In a random sample of 81,968 live births with data on parental education, levels of education were only weakly associated with gestational age or birth weight.

**Conclusions:** In Switzerland, small area variation in birth weight is largely explained, and variation in gestational age partially explained, by geocultural, socio-demographic and pregnancy factors.

### Strengths and limitations of this study

- This study was based on a large sample with national coverage, with data on neonatal and pregnancy-related predictors of gestational age and birth weight, and precise spatial data.
- No data were available on the mode of delivery, maternal smoking, mothers' weight and height or gestational diabetes.
- The fully adjusted model explained over 80% of the regional variation in birth weight and about 30% of the variation in gestational age.
- Language region, a proxy for cultural, social and behavioural factors, was a strong explanatory factor, with lower birth weight and shorter gestation in the French and Italian compared to the German language region.
- Unknown father was associated with shorter gestation and lower birth weight, indicating that children not recognised by their fathers may be at higher risk of poor outcomes.

## INTRODUCTION

Gestational age and birth weight are important indicators of prenatal development and predictors of infant morbidity, mortality and long-term health [1–4]. An understanding of geographic differences and their determinants can help to develop policies that reduce health inequalities across population groups and regions [1–4]. Many genetic, physiological, pregnancy-related, socio-economic, lifestyle and environmental factors have been reported to influence gestational age and birth weight [5–8]. Some of these factors tend to cluster in space and regional differences in health outcomes may hence be partially explained by the spatial distribution of their predictors. Importantly, both individual-level factors and the social and environmental characteristics of communities and neighbourhoods may contribute to regional differences [9,10].

Variation across small areas in pregnancy outcomes have not been studied widely. In Scotland, small area crime rates were associated with lower birth weight and with the risk of both small for gestational age babies and preterm birth [11]. A study at county level in Georgia and South Carolina in the United States showed that the proportion of African Americans was associated with low birth weight, whereas higher income was associated with higher birth weight [12]. Similarly, neighbourhood racial composition contributed to variation in low birth weight in New York State [13]. Other small-area analyses have examined associations between birth outcomes and air pollution [14,15]. To our knowledge, few small-area analyses have considered gestational age.

In Switzerland, studies of pregnancy outcomes have focused on specific groups such as migrants or HIV-infected women [16,17], but have not examined geographic variations. The Federal Office of Statistics publishes routine statistics from the Live Birth Register, which does not include geographic information [18]. The objectives of this study were to conduct a nationwide analysis of spatial variation in gestational age and birth weight, and to assess how much small-area variation was explained by available data about neonatal and pregnancy-related variables, parental characteristics and geographical variables.

## METHODS

### Data sources

We used deterministic methods to link three data sources using encrypted national identification numbers: the Live Birth Register, the Swiss National Cohort and the Structural Surveys. Registration of live births is compulsory by law in Switzerland coverage is near 100%. The Swiss National Cohort (SNC) is a long-term, national study of mortality in Switzerland [19,20], linking census and mortality records. The 1990 and 2000 censuses were the last house-to-house censuses with coverage of the entire Swiss population. From 2010 onwards, the national census was replaced by a national population register and annual postal survey of the resident population, known as Structural Surveys [21]. Each structural Survey includes a random sample of around 300,000 people aged 15 years or older; for example, in 2010, it included 317,221 persons [21]. The reference is the entire Swiss resident population and the reference day 31 December.

### Variables and definitions

We defined three sets of variables. The first set, neonatal and pregnancy-related variables come from the Live Birth Register; date of birth, birth weight, gestational age, sex and birth rank. Birth weight is measured after initial mother-child bonding, usually by the midwife using a calibrated hospital scale. Gestational age is based on the last menstrual period, with or without additional information from ultrasound scans. Birth rank was calculated from the list of all live births by the same mother recorded in the Live Birth Register, and is hence restricted to the births that occurred in Switzerland. It was classified as 1, 2, 3 and  $\geq 4$  live births, including the current birth. The second set includes parental variables. The Structural Surveys provide information about the highest level of completed maternal and paternal education, classified as 'tertiary', 'secondary', or 'compulsory or less'. The Swiss National Cohort provides data about parental nationality categorised as 'Swiss', 'Southern Europe', 'Western Europe', 'Northern Europe', 'Eastern Europe', 'Other' (non-European), or missing (supplementary [Table S1](#) gives the full list of countries). The third set, geographical variables comes from the Swiss National Cohort. Each live birth was assigned an altitude and one of 705 statistical areas [22], based on the geocode of place of residence of the mother at the time of birth. Language regions are 'German', 'French' and 'Italian', and the level of urbanisation was defined using standard definitions of 'urban', 'peri-urban' and 'rural'.



### Study populations and outcomes

All singleton live births recorded in the Live Birth Register from 1 January 2011 to 31 December 2014 were eligible. Gestational age at birth and birth weight were the outcomes of interest. For each outcome, two datasets were analysed: the first, larger dataset consisted of all eligible births with complete data on gestational age, birth weight and nationality of the mother. The second was the complete case population containing eligible live births with available data on all variables, including parental education. The second dataset hence included only newborns whose parents were included in the random sample of one of the Structural Surveys 2010-2014. We also excluded mothers who delivered at age less than 20 years, because education is incomplete at that age.

### Statistical and spatial analyses

We fitted linear mixed-effect models (LMEM) to examine the associations between the two outcomes and the neonatal and pregnancy, parental and environmental factors. In the model for birth weight, we log-transformed the outcome and used a cubic spline function with three knots at weeks 25, 30 and 35 to capture the relationship between gestational age and log birth weight. Log transforming the birth weight results in a multiplicative model. Except for gestational age, maternal age and altitude, all predictors were modelled categorically. Maternal age was modelled by a piece-wise linear function, with age group 20 to 30 years as the reference group and separate linear trends for age groups 30-40 years, over 40 years and less than 20 years. Altitude was centred at 500 m and modelled linearly. The random effects in the mixed-effect model captured area-level differences between observed and expected mean outcome, based on the 705 statistical areas [22]. In the main analysis, we fitted four models to the complete-case dataset: Model 0 contained no explanatory variables. Model 1 included birth and pregnancy-related variables: sex, birth rank and gestational age (for the analysis of birth weight). Model 2 additionally included age of the mother, parental education and nationality. Model 3 additionally included geographical variables: altitude, degree of urbanisation and language region.

We displayed mean gestational age and birth weight at area-level on maps and assessed to what extent spatial variation was accounted for by the explanatory variables. Values were categorised into seven intervals symmetric around the mean and color-coded. Spatial autocorrelation of the gestational age and birth weight across regions was tested by global and local Moran's I tests [23]. The global Moran test summarises overall spatial

1  
2  
3 autocorrelation and the local test identifies areas that are correlated with neighbouring  
4 areas. In the presence of spatial autocorrelation, model estimates are at risk of bias if the  
5 autocorrelation is not taken into account.  
6  
7

8  
9 We performed three sensitivity analyses. First, we accounted for spatial  
10 autocorrelation using the Besag-York-Mollier (BYM) model [24] using uninformative gamma-  
11 distributed (1, 0.005) priors. The calculations were carried out using the Integrated Nested  
12 Laplace Approximation (INLA) approach [25]. Similar results from models with and without  
13 the spatial component indicate low bias. Second, we repeated analyses of birth weight  
14 without adjusting for gestational age. Third we repeated analyses of birth weight and  
15 gestational age, additionally adjusting for neighbourhood socio-economic position (SEP),  
16 using an updated version of the Swiss SEP index, which is based on levels of rent, education  
17 and occupation of heads of households and crowding [26]. The updated version of the index  
18 is based on data from Structural Surveys 2010-2014, and includes information on income of  
19 households in the neighbourhood. We used quintiles of the index in the analysis, with higher  
20 quintiles indicating higher SEP.  
21  
22  
23  
24  
25  
26  
27  
28  
29  
30

31 All analyses and maps were done in R 3.3.2 [27] using packages lme4, maptools, sp,  
32 spdep, rgdal, INLA, GISTools, rgeos, raster and ggplot2.  
33  
34  
35

### 36 37 **Patient and public involvement**

38  
39 This analysis was based on routine registry data and no patients were involved in developing  
40 the research question, outcome measures and overall design of the study. Due to the  
41 anonymous nature of the data, we were unable to disseminate the results of the research  
42 directly to study participants.  
43  
44  
45  
46  
47  
48  
49  
50  
51  
52  
53  
54  
55  
56  
57  
58  
59  
60

## RESULTS

### Characteristics of study populations

A total of 328,349 live births were recorded in Switzerland between 1 January 2011 and 31 December 2014. We excluded non-singleton live births (n=11,835) and those with missing gestational age, birth weight or maternal nationality. The eligible study population therefore included 315,177 singleton live births. The complete case population consisted of 81,968 singleton live births with values available for all predictors including parental education, for which complete data were only available in the Structural Surveys (supplementary [Figure S1](#)).

[Table 1](#) shows the distributions of predictors and outcomes in the two study populations. Data about the nationality of fathers was missing for 1.5% of eligible live births. In almost all of these cases, information about the father was missing completely, indicating that the father is unknown to the authorities. Apart from missing data, the distributions of most variables were similar between the two nested datasets. The proportion of Swiss mothers and fathers was higher in the complete case population than in the eligible population. Birth at full term is defined as between 39 and 41 weeks of gestation (273 to 287 days). The mean gestational age in the eligible population was 276 days (SD 12) and the mean birth weight 3328 g (SD 515). The corresponding figures in the complete case population were 276 days (SD 12) and 3339 g (SD 501).

### Maps of gestational age and birth weight

[Figure 1](#) presents maps of Switzerland with crude average gestational age and birth weight across the 705 areas. For both outcomes, the maps are broadly similar between the eligible and complete case populations. For gestational age, area-level averages for the eligible population vary between 272 and 279 days. For the complete case population variation was greater, from 268 to 281 days, as expected for a smaller sample. The map shows shorter gestation in the Western, North Western region and Southern (Canton of Ticino) regions of Switzerland, with a patchy pattern in the densely populated areas between the Alps (across the centre) and Jura mountain ranges (to the North West). For birth weight, area-level averages vary between 3138 and 3467g for the eligible population and between 3080 and 3648 g for the complete case population. The maps for birth weight show lower birth weights in the Western and Southern regions of the country. The French and Italian-speaking

1  
2  
3 regions are in the West and South of Switzerland, with the remainder being German-  
4 speaking.  
5

### 6 7 **Multivariable analyses**

8  
9 Table 2 shows associations of area-level mean gestational age at birth and mean birth  
10 weight with pregnancy, parental and environmental factors from the fully adjusted linear  
11 mixed-effects models (model 3). For gestational age, the largest differences were observed  
12 across maternal age at birth. Compared to maternal age 20-30 years, gestational age was  
13 considerably shorter in teenage mothers, and in mothers aged over 40 years. For example, in  
14 mothers aged 15 years, pregnancies were about 4 days shorter, and after age of 40 years,  
15 they were about 3 days shorter for each 5-year increase in maternal age. Compared with  
16 Swiss fathers, pregnancies were about 4 days shorter if the nationality of the father was  
17 missing. Smaller differences in gestational age were observed across categories of sex, birth  
18 rank, nationality of the mother, urbanisation and between language regions (Table 2). In the  
19 complete case population, lower levels of education were associated with shorter  
20 pregnancies. Gestational age at birth was not associated with altitude.  
21  
22

23  
24  
25  
26  
27  
28  
29  
30  
31  
32  
33  
34  
35  
36  
37  
38  
39  
40  
41  
42  
43  
44  
45  
46  
47  
48  
49  
50  
51  
52  
53  
54  
55  
56  
57  
58  
59  
60  
Supplementary Figure S2 shows the relationship between gestational age and birth  
weight separately for male and female newborns. Male newborns were about 5% heavier  
than female newborns and birth weight increased with birth order (Table 2). In contrast to  
gestational age, mother's age was not associated with birth weight. Babies born to mothers  
or fathers from Northern or Eastern Europe were slightly heavier than babies born to Swiss  
mothers; birth weights were lowest for babies of fathers with missing nationality. Birth  
weight slightly decreased with increasing parental educational attainment. Babies born in  
the French and Italian-speaking regions were lighter than babies born in the German-  
speaking Switzerland. Finally, birth weight decreased with increasing altitude of residence.

### 51 52 **Proportion of spatial variation explained**

53  
54  
55  
56  
57  
58  
59  
60  
The fully adjusted model (model 3) for gestational age explained 31% and 39% of the spatial  
variation across the 705 areas for eligible and complete case populations, respectively. The  
corresponding figures for birth weight were 87% and 88%. When assessing each factor  
separately (Table 3), language region alone explained most of the spatial variation for both  
outcomes. For gestational age, level of urbanisation of the mother's place of residence also  
explained a considerable part of the variation. Factors that contributed to explaining the

1  
2  
3 spatial variation in birth weight were gestational age, parental nationalities, altitude at the  
4 mother's place of residence and birth order. [Figure 2](#) illustrates the reduction in the spatial  
5 variation of gestational age and birth weight with maps, moving from model 0 (0%  
6 reduction) to models 1, 2 and 3, based on the complete case population.  
7  
8  
9

### 10 **Spatial autocorrelation and sensitivity analyses**

11  
12 For gestational age, the global Moran's I statistic, based on the complete case dataset and  
13 model 0, was  $I=0.19$ , with  $P<10^{-14}$ . After adjusting for all the predictors in model 3 there was  
14 still some residual autocorrelation ( $I=0.10$ ,  $P=0.0004$ ). For birth weight, the corresponding  
15 Moran's I statistic was  $I=0.28$ , with  $P<10^{-15}$ . After adjusting for all predictors in model 3 there  
16 was little residual autocorrelation ( $I=0.04$ ,  $P=0.051$ ). Supplementary [Table S2](#) compares the  
17 results from model 3 accounting and not accounting for spatial autocorrelation. The results  
18 are similar and the potential bias from residual spatial autocorrelation is therefore unlikely  
19 to be a major issue. Repeating analyses of birth weight without adjusting for gestational age  
20 produced generally similar coefficients (supplementary [Table S3](#)). Associations with maternal  
21 age, maternal education and language regions were slightly stronger in model 3 without  
22 adjustment for gestational age, possibly because some of their effect was mediated by  
23 gestational age. Model 3 without gestational age explained 77% and 76% of the spatial  
24 variation in the eligible and complete case population, respectively. The index of  
25 neighbourhood SEP was only weakly associated with the two outcomes (Supplementary  
26 [Table S4](#)), and adjusting for it only slightly increased the amount of spatial variation  
27 explained.  
28  
29  
30  
31  
32  
33  
34  
35  
36  
37  
38  
39  
40  
41  
42  
43  
44  
45  
46  
47  
48  
49  
50  
51  
52  
53  
54  
55  
56  
57  
58  
59  
60

## DISCUSSION

Our study assessed factors associated with gestational age and birth weight in Switzerland and their contribution to spatial variation, based on routinely collected data. Gestational age at birth was strongly associated with maternal age, missing information on the father and language region. Birth weight was associated with sex, birth rank, missing information on the father, parental education, altitude and language region. The variables included in the fully adjusted model explained more than 80% of the regional variation in birth weight and about 30% of the regional variation in gestational age. Strengths of this study include a large sample with national coverage of the Swiss resident population, as well as the availability of data on several relevant predictors, either on all births or on a large random sample of eligible births. Precise spatial data and spatial statistics allowed us to assess the proportion of area-level variation explained, spatial autocorrelation and gauge the likelihood of bias due to residual autocorrelation.

This study found important spatial variation in both gestational age and birth weight in Switzerland. Language region in Switzerland was the single factor that explained the greatest proportion of spatial variation in gestational age and birth weight. In the French and Italian speaking regions, gestational age was shorter and birth weight lower than in the German speaking part. Language region is a proxy for a wide range of cultural, social and behavioural factors, including diet, smoking and alcohol consumption [28] of parents, as well as their ancestry. In this context it is noteworthy that neighbourhood SEP explained only a small proportion of the spatial variation.

Other factors that could not be measured directly, such as health care provision, might have accounted for some of the unexplained variation. In particular, data at the individual or small area level on the mode of delivery (vaginal or by Caesarean section, induced or spontaneous) were not available. The proportion of live births with Caesarian section as the mode of delivery varies across regions in Switzerland, and it is reasonable to expect that it would explain some of the remaining variation, both in gestational age and birth weight. Specifically, we would expect regions with higher proportions of Caesarian section to have lower mean gestational age (and consequently birthweight). However, the regional rates of Caesarian section published by the Federal Office of Statistics do not match this expectation [29], with urban areas showing some of the highest Caesarian section rates

1  
2  
3 but also high mean gestational age and birth weight. In fact, geographical patterns of  
4 Caesarean section seem to be largely driven by urban-rural differences. Differences in  
5 section rates may have contributed to spatial variation in gestational age, but it seems  
6 unlikely that they are an important driver of this variation.  
7  
8  
9

10  
11 While young and old maternal age are well-known predictors of shorter gestation  
12 [30,31], the association we found with missing data on the father's nationality was  
13 unexpected. In the vast majority of cases, the information is missing because no father came  
14 forward and officially accepted paternity of the child. It is possible that missing data about  
15 the father are an indicator of lower socio-economic position and social support of the  
16 mother, resulting in greater vulnerability. Studies from the United States of America found a  
17 missing name of the father on the infant's birth certificate was associated with lower  
18 education, smoking during pregnancy, preterm birth, lower birth weight, no breastfeeding  
19 and higher neonatal and post-neonatal mortality [32–35]. Children not recognised by their  
20 fathers may thus be a group at higher risk of infant and child morbidity and mothers might  
21 benefit from additional care during pregnancy and postnatally.  
22  
23  
24  
25  
26  
27  
28  
29  
30

31  
32 There are several limitations to our study. We did not have data about maternal  
33 health-related behaviours such as smoking [36], mothers' weight and height [36], disease  
34 such as gestational diabetes and data on parental genetic factors. Whilst parental nationality  
35 and education might have served as crude proxies for some missing variables, individual-  
36 level data about these factors would be valuable. A recent large-scale meta-analysis of  
37 genome-wide association data indicated that genetic factors influence birth weight through  
38 their effects on gestational age, maternal glucose metabolism, cytochrome P450 activity and  
39 possibly through effects on maternal immune function and blood pressure [37]. Of note,  
40 compared to the foetus who carries maternal and paternal genes, maternal genes exert a  
41 larger effect on gestational age and a weaker effect on birth weight [38,39].  
42  
43  
44  
45  
46  
47  
48  
49

50  
51 Our study also showed associations between mean gestational age and  
52 the proportion of preterm births (<37 weeks), as well as mean birth weight and proportion  
53 of low birth weight newborns (<2500 g) across the 705 small areas, i.e. associations with  
54 conditions that are clinically relevant ([Figure S3](#)). However, from a statistical point of view,  
55 analyzing means is more robust and powerful than using a binary indicator defined by a  
56 cutoff [40]. Finally, we adjusted analyses of birth weight for gestational age, which may  
57  
58  
59  
60

1  
2  
3 mediate the effects of other variables, for example maternal age. Adjusting for a variable on  
4 the causal pathway has been criticised because it may introduce selection bias (or collider  
5 bias in the language of directed acyclic graphs), if there are unknown or unmeasured factors  
6 that have an effect on both gestational age and birth weight [41–43]. In this study, results  
7 were broadly similar with and without adjustment for gestational age and our focus was not  
8 on causal inference, but on gaining an understanding of the factors contributing to spatial  
9 variation of birth weight and gestational age.  
10  
11  
12  
13  
14  
15

16 In conclusion, our study identified important differences in mean gestational age and  
17 birth weight across Switzerland. Small area variation in birth weight is largely, and variation  
18 in gestational age partially explained by pregnancy-related, parental, and environmental  
19 factors.  
20  
21  
22  
23  
24  
25  
26  
27  
28  
29  
30  
31  
32  
33  
34  
35  
36  
37  
38  
39  
40  
41  
42  
43  
44  
45  
46  
47  
48  
49  
50  
51  
52  
53  
54  
55  
56  
57  
58  
59  
60



## REFERENCES

- 1 Regev RH, Lusky A, Dolfin T, *et al.* Excess mortality and morbidity among small-for-gestational-age premature infants: a population-based study. *J Pediatr* 2003;**143**:186–91.
- 2 Wilcox AJ. Birth weight and perinatal mortality: the effect of maternal smoking. *Am J Epidemiol* 1993;**137**:1098–104.
- 3 Barker DJ, Winter PD, Osmond C, *et al.* Weight in infancy and death from ischaemic heart disease. *Lancet* 1989;**ii**:577–80.<http://www.ncbi.nlm.nih.gov/pubmed/2570282> (accessed 3 Feb 2015).
- 4 Lubchenco LO, Searls DT, Brazie J V. Neonatal mortality rate: relationship to birth weight and gestational age. *J Pediatr* 1972;**81**:814–22.
- 5 de Bernabé J V., Soriano T, Albaladejo R, *et al.* Risk factors for low birth weight: a review. *Eur J Obstet Gynecol Reprod Biol* 2004;**116**:3–15.
- 6 Kramer MS. Determinants of low birth weight: methodological assessment and meta-analysis. *Bull World Health Organ* 1987;**65**:663–737.
- 7 Secker-Walker RH, Vacek PM. Relationships between cigarette smoking during pregnancy, gestational age, maternal weight gain, and infant birthweight. *Addict Behav* 2003;**28**:55–66. doi:10.1016/S0306-4603(01)00216-7
- 8 Matoba N, Yu Y, Mestan K, *et al.* Differential Patterns of 27 Cord Blood Immune Biomarkers Across Gestational Age. *Pediatrics* 2009;**123**:1320–8. doi:10.1542/peds.2008-1222
- 9 Diez Roux A V, Mair C. Neighborhoods and health. *Ann N Y Acad Sci* 2010;**1186**:125–45. doi:10.1111/j.1749-6632.2009.05333.x
- 10 Macintyre S, Ellaway A, Cummins S. Place effects on health: how can we conceptualise, operationalise and measure them? *Soc Sci Med* 2002;**55**:125–39.<http://www.ncbi.nlm.nih.gov/pubmed/12137182>
- 11 Clemens T, Dibben C. Living in stressful neighbourhoods during pregnancy: An observational study of crime rates and birth outcomes. *Eur J Public Health* 2017;**27**:197–202. doi:10.1093/eurpub/ckw131
- 12 Kirby RS, Liu J, Lawson AB, *et al.* Spatio-temporal patterning of small area low birth weight incidence and its correlates: A latent spatial structure approach. *Spat Spatiotemporal Epidemiol* 2011;**2**:265–71. doi:10.1016/j.sste.2011.07.011

- 1  
2  
3 13 Insaf TZ, Talbot T. Identifying areas at risk of low birth weight using spatial  
4 epidemiology: A small area surveillance study. *Prev Med (Baltim)* 2016;**88**:108–14.  
5 doi:10.1016/j.ypmed.2016.03.019  
6  
7  
8 14 Dibben C, Clemens T. Place of work and residential exposure to ambient air pollution  
9 and birth outcomes in Scotland, using geographically fine pollution climate mapping  
10 estimates. *Environ Res* 2015;**140**:535–41. doi:10.1016/j.envres.2015.05.010  
11  
12  
13 15 Ghosh JKC, Wilhelm M, Su J, *et al.* Assessing the Influence of Traffic-related Air  
14 Pollution on Risk of Term Low Birth Weight on the Basis of Land-Use-based Regression  
15 Models and Measures of Air Toxics. *Am J Epidemiol* 2012;**175**:1262–74.  
16 doi:10.1093/aje/kwr469  
17  
18  
19 16 Aebi-Popp K, Lapaire O, Glass TR, *et al.* Pregnancy and delivery outcomes of HIV  
20 infected women in Switzerland 2003-2008. *J Perinat Med* 2010;**38**:353–8.  
21 doi:10.1515/JPM.2010.052  
22  
23  
24 17 Jaeger FN, Hossain M, Kiss L, *et al.* The health of migrant children in Switzerland. *Int J*  
25 *Public Health* 2012;**57**:659–71. doi:10.1007/s00038-012-0375-8  
26  
27  
28 18 Federal Statistical Office. Births.  
29 [https://www.bfs.admin.ch/bfs/de/home/statistiken/bevoelkerung/geburten-](https://www.bfs.admin.ch/bfs/de/home/statistiken/bevoelkerung/geburten-todesfaelle/geburten.html)  
30 [todesfaelle/geburten.html](https://www.bfs.admin.ch/bfs/de/home/statistiken/bevoelkerung/geburten-todesfaelle/geburten.html) (accessed 18 Sep 2018).  
31  
32  
33 19 Spörri A, Zwahlen M, Egger M, *et al.* The Swiss National Cohort: a unique database for  
34 national and international researchers. *Int J Public Heal* 2010;**55**:239–42.  
35 doi:10.1007/s00038-010-0160-5  
36  
37  
38 20 Bopp M, Spörri A, Zwahlen M, *et al.* Cohort Profile: the Swiss National Cohort--a  
39 longitudinal study of 6.8 million people. *Int J Epidemiol* 2009;**38**:379–84.  
40 doi:10.1093/ije/dyn042  
41  
42  
43 21 Federal Statistical Office. Structural Survey.  
44 <https://www.bfs.admin.ch/bfs/en/home/statistics/population/surveys/se.html>  
45 (accessed 18 Sep 2018).  
46  
47  
48 22 Federal Statistical Office. Swiss MedStat regions.  
49 <https://www.bfs.admin.ch/bfs/de/home/statistiken/gesundheit/nomenklaturen/med>  
50 [sreg.html](https://www.bfs.admin.ch/bfs/de/home/statistiken/gesundheit/nomenklaturen/med) (accessed 18 Sep 2018).  
51  
52  
53 23 Moran PAP. Notes on Continuous Stochastic Phenomena. *Biometrika* 1950;**37**:17–  
54 23.<http://www.jstor.org/stable/2332142>  
55  
56  
57  
58  
59  
60

- 1  
2  
3 24 Besag J, York J, Mollié A. Bayesian image restoration, with two applications in spatial  
4 statistics. *Ann Inst Stat Math* 1991;:1–20.  
5  
6  
7 25 Rue H, Martino S, Chopin N. Approximate Bayesian inference for latent Gaussian  
8 models by using integrated nested Laplace approximations. *J R Stat Soc Ser B*  
9 2009;**71**:319–92.  
10  
11  
12 26 Panczak R, Galobardes B, Voorpostel M, *et al*. A Swiss neighbourhood index of  
13 socioeconomic position: development and association with mortality. *J Epidemiol*  
14 *Community Health* 2012;**66**:1129–36. doi:10.1136/jech-2011-200699  
15  
16  
17 27 The R Core Team: R. A Language and Environment for Statistical Computing. Vienna,  
18 Austria. 2014;ISBN 3-900.http://www.r-project.org.  
19  
20  
21 28 Faeh D, Minder C, Gutzwiller F, *et al*. Culture, risk factors and mortality: can  
22 Switzerland add missing pieces to the European puzzle? *J Epidemiol Community Heal*  
23 2009;**63**:639–645.  
24  
25  
26  
27 29 Federal Office of Statistics. Rate of Caeserian section (MS regions).  
28 [https://www.bfs.admin.ch/bfs/en/home/statistics/catalogues-](https://www.bfs.admin.ch/bfs/en/home/statistics/catalogues-databases/maps.assetdetail.4262550.html)  
29 [databases/maps.assetdetail.4262550.html](https://www.bfs.admin.ch/bfs/en/home/statistics/catalogues-databases/maps.assetdetail.4262550.html)  
30  
31  
32 30 Kozuki N, Lee AC, Silveira MF, *et al*. The associations of parity and maternal age with  
33 small-for-gestational-age, preterm, and neonatal and infant mortality: A meta-  
34 analysis. *BMC Public Health*. 2013;**13**:S2. doi:10.1186/1471-2458-13-S3-S2  
35  
36  
37  
38 31 Restrepo-Méndez MC, Lawlor DA, Horta BL, *et al*. The association of maternal age  
39 with birthweight and gestational age: A cross-cohort comparison. *Paediatr Perinat*  
40 *Epidemiol* 2015;**29**:31–40. doi:10.1111/ppe.12162  
41  
42  
43 32 Alio AP, Mbah AK, Kornosky JL, *et al*. Assessing the impact of paternal involvement on  
44 racial/ethnic disparities in infant mortality rates. *J Community Health* 2011;**36**:63–8.  
45 doi:10.1007/s10900-010-9280-3  
46  
47  
48  
49 33 Gaudino JA, Jenkins B, Rochat RW. No fathers' names: A risk factor for infant mortality  
50 in the State of Georgia, Usa. *Soc Sci Med* 1999;**48**:253–65. doi:10.1016/S0277-  
51 9536(98)00342-6  
52  
53  
54 34 Cheng ER, Hawkins SS, Rifas-Shiman SL, *et al*. Association of missing paternal  
55 demographics on infant birth certificates with perinatal risk factors for childhood  
56 obesity. *BMC Public Health* 2016;**16**:1–10. doi:10.1186/s12889-016-3110-1  
57  
58  
59 35 Tan H, Wen SW, Walker M, *et al*. Missing paternal demographics: A novel indicator for  
60

- 1  
2  
3 identifying high risk population of adverse pregnancy outcomes. *BMC Pregnancy*  
4 *Childbirth* 2004;**4**. doi:10.1186/1471-2393-4-21  
5  
6  
7 36 Wen SW, Goldenberg RL, Cutter GR, *et al*. Smoking, maternal age, fetal growth, and  
8 gestational age at delivery. *Am J Obstet Gynecol* 1990;**162**:53–8. doi:10.1016/0002-  
9 9378(90)90819-5  
10  
11  
12 37 Beaumont RN, Warrington NM, Cavadino A, *et al*. Genome-wide association study of  
13 offspring birth weight in 86 577 women identifies five novel loci and highlights  
14 maternal genetic effects that are independent of fetal genetics. *Hum Mol Genet*  
15 2018;**27**:742–56. doi:10.1093/hmg/ddx429  
16  
17  
18 38 Beaty TH. Invited commentary: Two studies of genetic control of birth weight where  
19 large data sets were available. *Am J Epidemiol* 2007;**165**:753–5.  
20  
21 doi:10.1093/aje/kwk106  
22  
23  
24 39 Lunde A, Melve KK, Gjessing HK, *et al*. Genetic and environmental influences on birth  
25 weight, birth length, head circumference, and gestational age by use of population-  
26 based parent-offspring data. *Am J Epidemiol* 2007;**165**:734–41.  
27  
28 doi:10.1093/aje/kwk107  
29  
30  
31 40 Altman DG, Royston P. The cost of dichotomising continuous variables. *BMJ*  
32 2006;**332**:1080.  
33  
34  
35 41 Cole SR, Platt RW, Schisterman EF, *et al*. Illustrating bias due to conditioning on a  
36 collider. *Int J Epidemiol* 2010;**39**:417–20. doi:10.1093/ije/dyp334  
37  
38  
39 42 Delbaere I, Vansteelandt S, De Bacquer D, *et al*. Should we adjust for gestational age  
40 when analysing birth weights? The use of z-scores revisited. *Hum Reprod*  
41 2007;**22**:2080–3. doi:10.1093/humrep/dem151  
42  
43  
44 43 Wilcox AJ, Weinberg CR, Basso O. On the pitfalls of adjusting for gestational age at  
45 birth. *Am J Epidemiol* 2011;**174**:1062–8. doi:10.1093/aje/kwr230  
46  
47  
48  
49  
50  
51  
52  
53  
54  
55  
56  
57  
58  
59  
60

Table 1. Characteristics of complete case and eligible study populations.

|                                  | Eligible population |                               |                               | Complete case population |                               |                               |
|----------------------------------|---------------------|-------------------------------|-------------------------------|--------------------------|-------------------------------|-------------------------------|
|                                  | No. (%)             | Gest. age (days)<br>Mean (SD) | Birth weight (g)<br>Mean (SD) | No. (%)                  | Gest. age (days)<br>Mean (SD) | Birth weight (g)<br>Mean (SD) |
| <b>Total</b>                     | 315'177 (100%)      | 276 (12)                      | 3328 (515)                    | 81'968 (100%)            | 276 (12)                      | 3339 (501)                    |
| <b>Birth weight (g)</b>          |                     |                               |                               |                          |                               |                               |
| <1500                            | 2141 (0.7%)         | 196 (27)                      | 966 (354)                     | 445 (0.5%)               | 198 (28)                      | 983 (491)                     |
| 1500-1999                        | 2413 (0.8%)         | 238 (15)                      | 1800 (142)                    | 612 (0.7%)               | 239 (15)                      | 1803 (528)                    |
| 2000-2499                        | 10036 (3.2%)        | 258 (14)                      | 2312 (134)                    | 2484 (3%)                | 258 (13)                      | 2314 (477)                    |
| ≥ 2500                           | 300586 (95.4%)      | 277 (9)                       | 3391 (423)                    | 78426 (95.7%)            | 277 (9)                       | 3396 (502)                    |
| <b>Gestation. age (weeks)</b>    |                     |                               |                               |                          |                               |                               |
| <32 <sup>0</sup>                 | 2333 (0.7%)         | 195 (23)                      | 1108 (527)                    | 487 (0.6%)               | 196 (23)                      | 1134 (491)                    |
| 32 <sup>0</sup> -34 <sup>6</sup> | 3950 (1.3%)         | 237 (6)                       | 2144 (424)                    | 961 (1.2%)               | 237 (6)                       | 2136 (470)                    |
| 35 <sup>0</sup> -36 <sup>6</sup> | 10907 (3.5%)        | 253 (4)                       | 2686 (431)                    | 2760 (3.4%)              | 253 (4)                       | 2692 (489)                    |
| ≥ 37 <sup>0</sup>                | 297987 (94.5%)      | 278 (8)                       | 3385 (440)                    | 77760 (94.9%)            | 278 (8)                       | 3390 (502)                    |
| <b>Sex</b>                       |                     |                               |                               |                          |                               |                               |
| Female                           | 152757 (48.5%)      | 276 (12)                      | 3260 (494)                    | 39823 (48.6%)            | 276 (11)                      | 3267 (502)                    |
| Male                             | 162420 (51.5%)      | 275 (13)                      | 3392 (525)                    | 42145 (51.4%)            | 276 (12)                      | 3406 (501)                    |
| <b>Birth rank</b>                |                     |                               |                               |                          |                               |                               |
| 1                                | 155739 (49.4%)      | 276 (13)                      | 3262 (519)                    | 37763 (46.1%)            | 276 (13)                      | 3267 (498)                    |
| 2                                | 115440 (36.6%)      | 275 (11)                      | 3382 (497)                    | 32315 (39.4%)            | 276 (11)                      | 3386 (504)                    |
| 3                                | 34364 (10.9%)       | 275 (11)                      | 3418 (509)                    | 9360 (11.4%)             | 275 (11)                      | 3430 (508)                    |
| ≥ 4                              | 9634 (3.1%)         | 275 (12)                      | 3438 (537)                    | 2530 (3.1%)              | 275 (11)                      | 3459 (498)                    |
| <b>Civil status</b>              |                     |                               |                               |                          |                               |                               |
| Married                          | 250055 (79.3%)      | 276 (12)                      | 3345 (508)                    | 69465 (84.7%)            | 276 (12)                      | 3349 (501)                    |
| Not married                      | 65122 (20.7%)       | 276 (14)                      | 3262 (536)                    | 12503 (15.3%)            | 276 (13)                      | 3283 (503)                    |
| <b>Maternal age (years)</b>      |                     |                               |                               |                          |                               |                               |
| mean (SD)                        | 31.7 (5.0)          |                               |                               | 32.2 (4.7)               |                               |                               |
| < 20                             | 2679 (0.8%)         | 275 (16)                      | 3224 (554)                    | 0 (0%)                   | -                             | -                             |
| ≥ 20-25                          | 28615 (9.1%)        | 277 (12)                      | 3317 (511)                    | 5417 (6.6%)              | 277 (12)                      | 3337 (491)                    |
| ≥ 25-30                          | 82620 (26.2%)       | 276 (12)                      | 3330 (506)                    | 20771 (25.3%)            | 276 (12)                      | 3337 (500)                    |
| ≥ 30-35                          | 118303 (37.5%)      | 276 (12)                      | 3335 (510)                    | 32771 (40%)              | 276 (12)                      | 3341 (505)                    |
| ≥ 35-40                          | 67914 (21.5%)       | 275 (12)                      | 3333 (523)                    | 19052 (23.2%)            | 275 (11)                      | 3345 (497)                    |
| ≥ 40                             | 15046 (4.8%)        | 273 (14)                      | 3286 (555)                    | 3957 (4.8%)              | 273 (14)                      | 3295 (512)                    |
| <b>Nationality mother</b>        |                     |                               |                               |                          |                               |                               |
| Switzerland                      | 194570 (61.7%)      | 276 (12)                      | 3322 (511)                    | 55591 (67.8%)            | 276 (12)                      | 3331 (502)                    |
| Southern Europe                  | 23585 (7.5%)        | 275 (12)                      | 3251 (494)                    | 5761 (7%)                | 276 (11)                      | 3261 (502)                    |
| Western Europe                   | 26005 (8.3%)        | 276 (12)                      | 3348 (516)                    | 6495 (7.9%)              | 276 (12)                      | 3359 (508)                    |
| Northern Europe                  | 3695 (1.2%)         | 276 (13)                      | 3418 (510)                    | 850 (1%)                 | 276 (13)                      | 3414 (508)                    |
| Eastern Europe                   | 38762 (12.3%)       | 276 (13)                      | 3397 (523)                    | 8035 (9.8%)              | 276 (12)                      | 3422 (499)                    |
| Other                            | 28560 (9.1%)        | 275 (14)                      | 3313 (535)                    | 5236 (6.4%)              | 275 (13)                      | 3332 (492)                    |
| <b>Nationality father</b>        |                     |                               |                               |                          |                               |                               |
| Switzerland                      | 191589 (60.8%)      | 276 (12)                      | 3329 (506)                    | 55432 (67.6%)            | 276 (12)                      | 3336 (502)                    |
| Southern Europe                  | 31466 (10%)         | 275 (12)                      | 3256 (493)                    | 7970 (9.7%)              | 275 (11)                      | 3262 (504)                    |
| Western Europe                   | 26954 (8.6%)        | 276 (12)                      | 3353 (518)                    | 6661 (8.1%)              | 276 (12)                      | 3367 (514)                    |
| Northern Europe                  | 3911 (1.2%)         | 276 (12)                      | 3406 (510)                    | 887 (1.1%)               | 276 (13)                      | 3393 (499)                    |
| Eastern Europe                   | 35387 (11.2%)       | 276 (13)                      | 3397 (528)                    | 7229 (8.8%)              | 276 (12)                      | 3418 (489)                    |
| Other                            | 21077 (6.7%)        | 276 (13)                      | 3307 (531)                    | 3789 (4.6%)              | 276 (12)                      | 3319 (497)                    |
| missing                          | 4793 (1.5%)         | 272 (23)                      | 3148 (693)                    | -                        | -                             | -                             |
| <b>Education mother</b>          |                     |                               |                               |                          |                               |                               |
| Tertiary                         | 42088 (13.4%)       | 276 (12)                      | 3344 (500)                    | 33505 (40.9%)            | 276 (12)                      | 3347 (500)                    |
| Secondary                        | 48878 (15.5%)       | 276 (12)                      | 3328 (509)                    | 38382 (46.8%)            | 276 (12)                      | 3331 (502)                    |
| Compulsory                       | 14642 (4.6%)        | 275 (13)                      | 3329 (534)                    | 10081 (12.3%)            | 275 (13)                      | 3336 (503)                    |
| Unknown (age <20 yrs)            | 2679 (0.8%)         | 275 (16)                      | 3224 (554)                    | 0 (0%)                   | -                             | -                             |
| missing                          | 206890 (65.6%)      | 276 (12)                      | 3326 (517)                    | -                        | -                             | -                             |
| <b>Education father</b>          |                     |                               |                               |                          |                               |                               |
| Tertiary                         | 49848 (15.8%)       | 276 (12)                      | 3348 (497)                    | 40345 (49.2%)            | 276 (12)                      | 3350 (500)                    |
| Secondary                        | 41301 (13.1%)       | 276 (12)                      | 3323 (511)                    | 32118 (39.2%)            | 276 (12)                      | 3327 (504)                    |
| Compulsory                       | 13731 (4.4%)        | 276 (12)                      | 3323 (514)                    | 9505 (11.6%)             | 276 (12)                      | 3330 (500)                    |
| missing                          | 210297 (66.7%)      | 276 (13)                      | 3325 (519)                    | -                        | -                             | -                             |
| <b>Altitude (m)</b>              |                     |                               |                               |                          |                               |                               |
| mean (SD)                        | 515 (189)           |                               |                               | 511 (180)                |                               |                               |
| <b>Urbanisation</b>              |                     |                               |                               |                          |                               |                               |
| Urban                            | 96643 (30.7%)       | 276 (13)                      | 3326 (517)                    | 22770 (27.8%)            | 276 (12)                      | 3334 (502)                    |
| Peri-urban                       | 138826 (44%)        | 275 (12)                      | 3329 (514)                    | 36629 (44.7%)            | 276 (12)                      | 3339 (502)                    |
| Rural                            | 79708 (25.3%)       | 276 (12)                      | 3329 (512)                    | 22569 (27.5%)            | 276 (12)                      | 3343 (500)                    |
| <b>Language region</b>           |                     |                               |                               |                          |                               |                               |
| German                           | 223586 (70.9%)      | 276 (12)                      | 3348 (515)                    | 54106 (66%)              | 276 (12)                      | 3362 (502)                    |
| French                           | 80068 (25.4%)       | 275 (12)                      | 3283 (512)                    | 23579 (28.8%)            | 275 (12)                      | 3296 (501)                    |
| Italian                          | 11523 (3.7%)        | 275 (12)                      | 3252 (494)                    | 4283 (5.2%)              | 275 (11)                      | 3268 (500)                    |
| <b>Socio-economic position</b>   |                     |                               |                               |                          |                               |                               |
| 1st quintile                     | 63230 (20.1%)       | 276 (12)                      | 3318 (522)                    | 15752 (19.2%)            | 276 (12)                      | 3331 (501)                    |
| 2nd quintile                     | 63199 (20.1%)       | 276 (12)                      | 3324 (519)                    | 16034 (19.6%)            | 276 (12)                      | 3334 (505)                    |
| 3rd quintile                     | 63156 (20%)         | 276 (12)                      | 3329 (516)                    | 16555 (20.2%)            | 276 (12)                      | 3337 (500)                    |
| 4th quintile                     | 62970 (20%)         | 276 (12)                      | 3335 (509)                    | 16933 (20.7%)            | 276 (12)                      | 3344 (500)                    |
| 5th quintile                     | 62622 (19.9%)       | 276 (12)                      | 3335 (507)                    | 16694 (20.4%)            | 276 (12)                      | 3346 (502)                    |

**Table 2. Associations of mean gestational age at birth and mean birth weight with pregnancy, parental and environmental factors from adjusted linear mixed-effects model (model 3).**

|                                                          | Gestational age (days)        |                          | Birth weight (g) *                   |                                      |
|----------------------------------------------------------|-------------------------------|--------------------------|--------------------------------------|--------------------------------------|
|                                                          | Absolute differences (95% CI) |                          | Relative differences (95% CI)        |                                      |
|                                                          | Eligible population           | Complete case population | Eligible population                  | Complete case population             |
| <b>Intercept</b>                                         | 277.3 (277.2 to 277.5)        | 277.9 (277.7 to 278.2)   | 3278 (3218 to 3339) <sup>&amp;</sup> | 3298 (3180 to 3420) <sup>&amp;</sup> |
| <b>Sex</b>                                               |                               |                          |                                      |                                      |
| Female                                                   | 0                             | 0                        | 1                                    | 1                                    |
| Male                                                     | -0.56 (-0.65, -0.48)          | -0.63 (-0.79, -0.47)     | 1.045 (1.044 to 1.046)               | 1.048 (1.046, 1.049)                 |
| <b>Birth rank</b>                                        |                               |                          |                                      |                                      |
| 1 <sup>¶</sup>                                           | 0                             | 0                        | 1                                    | 1                                    |
| 2                                                        | -0.39 (-0.49, -0.29)          | -0.34 (-0.52, -0.16)     | 1.038 (1.037, 1.039)                 | 1.039 (1.037, 1.041)                 |
| 3                                                        | -0.37 (-0.52, -0.22)          | -0.16 (-0.44, 0.11)      | 1.050 (1.048, 1.051)                 | 1.054 (1.051, 1.057)                 |
| ≥ 4                                                      | -0.24 (-0.50, 0.02)           | 0.24 (-0.25, 0.72)       | 1.058 (1.056, 1.061)                 | 1.065 (1.059, 1.070)                 |
| <b>Age mother (yrs)<sup>‡</sup></b>                      |                               |                          |                                      |                                      |
| < 20 (per 5 yrs decr.)                                   | -4.10 (-5.59, -2.61)          | -                        | 1.002 (0.987, 1.017)                 | -                                    |
| ≥ 20-30 <sup>¶</sup>                                     | 0                             | 0                        | 1                                    | 1                                    |
| ≥ 30-40 (per 5 yrs)                                      | -0.99 (-1.06, -0.91)          | -0.93 (-1.07, -0.78)     | 1.000 (1.000, 1.001)                 | 0.998 (0.997, 1.000)                 |
| ≥ 40 (per 5 yrs)                                         | -2.93 (-3.36, -2.50)          | -3.46 (-4.29, -2.63)     | 0.998 (0.994, 1.003)                 | 0.998 (0.990, 1.006)                 |
| <b>Civil status<sup>◊</sup></b>                          |                               |                          |                                      |                                      |
| Married                                                  | 0                             | 0                        | 1                                    | 1                                    |
| Not married                                              | -0.01 (-0.13, 0.10)           | 0.15 (-0.08, 0.38)       | 0.990 (0.989, 0.991)                 | 0.993 (0.99, 0.995)                  |
| <b>Nationality mother</b>                                |                               |                          |                                      |                                      |
| Switzerland <sup>¶</sup>                                 | 0                             | 0                        | 1                                    | 1                                    |
| S Europe                                                 | 0.20 (-0.01, 0.40)            | 0.39 (0.0, 0.78)         | 0.994 (0.992, 0.996)                 | 0.995 (0.991, 0.999)                 |
| W Europe                                                 | 0.20 (0.02, 0.38)             | -0.08 (-0.43, 0.26)      | 1.008 (1.006, 1.010)                 | 1.007 (1.004, 1.011)                 |
| N Europe                                                 | 0.37 (-0.07, 0.81)            | 0.30 (-0.57, 1.17)       | 1.025 (1.020, 1.029)                 | 1.022 (1.013, 1.031)                 |
| E Europe                                                 | 0.21 (0.04, 0.38)             | 0.33 (-0.01, 0.68)       | 1.013 (1.011, 1.014)                 | 1.017 (1.014, 1.021)                 |
| Other                                                    | -0.32 (-0.49, -0.14)          | -0.67 (-1.05, -0.30)     | 1.007 (1.005, 1.008)                 | 1.012 (1.008, 1.016)                 |
| <b>Nationality father</b>                                |                               |                          |                                      |                                      |
| Switzerland <sup>¶</sup>                                 | 0                             | 0                        | 1                                    | 1                                    |
| S Europe                                                 | -0.46 (-0.64, -0.28)          | -0.28 (-0.62, 0.06)      | 0.991 (0.990, 0.993)                 | 0.993 (0.989, 0.996)                 |
| W Europe                                                 | 0.07 (-0.11, 0.25)            | 0.30 (-0.04, 0.63)       | 1.008 (1.006, 1.009)                 | 1.006 (1.003, 1.010)                 |
| N Europe                                                 | 0.51 (0.08, 0.94)             | -0.24 (-1.09, 0.62)      | 1.013 (1.009, 1.017)                 | 1.011 (1.003, 1.020)                 |
| E Europe                                                 | -0.46 (-0.64, -0.28)          | -0.01 (-0.38, 0.36)      | 1.009 (1.007, 1.010)                 | 1.011 (1.008, 1.015)                 |
| Other                                                    | -0.02 (-0.22, 0.18)           | 0.48 (0.05, 0.90)        | 0.992 (0.991, 0.994)                 | 0.992 (0.987, 0.996)                 |
| missing                                                  | -3.87 (-4.24, -3.50)          | -                        | 0.989 (0.985, 0.992)                 | -                                    |
| <b>Education mother</b>                                  |                               |                          |                                      |                                      |
| Tertiary <sup>¶</sup>                                    |                               | 0                        |                                      | 1                                    |
| Secondary                                                |                               | -0.55 (-0.74, -0.36)     |                                      | 0.996 (0.995, 0.998)                 |
| Compulsory                                               |                               | -0.90 (-1.22, -0.58)     |                                      | 0.993 (0.990, 0.996)                 |
| <b>Education father</b>                                  |                               |                          |                                      |                                      |
| Tertiary <sup>¶</sup>                                    |                               | 0                        |                                      | 1                                    |
| Secondary                                                |                               | -0.16 (-0.35, 0.03)      |                                      | 0.996 (0.994, 0.998)                 |
| Compulsory                                               |                               | -0.25 (-0.58, 0.07)      |                                      | 0.997 (0.994, 1.000)                 |
| <b>Altitude (m)</b>                                      |                               |                          |                                      |                                      |
| 500 <sup>¶</sup>                                         | 0                             | 0                        | 1                                    | 1                                    |
| per 500 m increase                                       | 0.07 (-0.09, 0.23)            | 0.03 (-0.24, 0.30)       | 0.989 (0.988, 0.991)                 | 0.989 (0.987, 0.992)                 |
| <b>Urbanization</b>                                      |                               |                          |                                      |                                      |
| Urban <sup>¶</sup>                                       | 0                             | 0                        | 1                                    | 1                                    |
| Peri-urban                                               | -0.43 (-0.57, -0.28)          | -0.59 (-0.82, -0.36)     | 1.001 (1.000, 1.002)                 | 1.003 (1.000, 1.005)                 |
| Rural                                                    | -0.15 (-0.32, 0.02)           | -0.29 (-0.55, -0.02)     | 1.000 (0.998, 1.001)                 | 1.003 (1.001, 1.006)                 |
| <b>Language region</b>                                   |                               |                          |                                      |                                      |
| German <sup>¶</sup>                                      | 0                             | 0                        | 1                                    | 1                                    |
| French                                                   | -0.62 (-0.77, -0.47)          | -0.66 (-0.88, -0.44)     | 0.989 (0.987, 0.990)                 | 0.988 (0.985, 0.990)                 |
| Italian                                                  | -0.94 (-1.26, -0.63)          | -1.11 (-1.55, -0.68)     | 0.982 (0.980, 0.985)                 | 0.983 (0.979, 0.987)                 |
| <b>Percent of spatial variance explained<sup>†</sup></b> | 31%                           | 39%                      | 87%                                  | 88%                                  |

\*Birth weight was modelled on a log scale, which results in multiplicative effects. The model for birth weight was additionally adjusted for gestational age by a cubic spline function with knots at weeks 25, 30 and 35.

<sup>&</sup> In the model for BW, the intercept corresponds to an estimated mean birth weight (g) for a singleton girl born at gestational age 40 weeks as the first child (rank 1) in a German-speaking, urban region of elevation 500m, whose mother is 20-30 years old at birth and married, and both parents have Swiss nationality and tertiary education.

<sup>¶</sup> Reference category

<sup>‡</sup> Age modelled by a piece-wise linear function: constant at reference range ≥20-30, and separate slopes for age <20, ≥30-40, and ≥40.

<sup>◊</sup> Married or in registered partnership / Not married: Single, widow, divorced or in dissolved partnership

<sup>†</sup> Percentage of regional variance explained by model predictors, i.e. percent reduction in variance of random effects ( $\sigma^2$ ) when compared to model with no predictors (model 0).

**Table 3. Percentage of spatial variation explained by each individual variable and explained in addition after adjusting for all other variables.**

| Spatial variation explained               |                      | Gestational age     |                          | Birth weight        |                          |
|-------------------------------------------|----------------------|---------------------|--------------------------|---------------------|--------------------------|
|                                           |                      | Eligible population | Complete case population | Eligible population | Complete case population |
| <b>By single variables</b>                |                      |                     |                          |                     |                          |
| <b>Pregnancy factors</b>                  | Gestational age      | -                   | -                        | 27%                 | 34%                      |
|                                           | Sex                  | 0%                  | 0%                       | 1%                  | 2%                       |
|                                           | Birth rank           | 0%                  | 1%                       | 4%                  | 0%                       |
| <b>Parental factors</b>                   | Maternal age         | 0%                  | 1%                       | 1%                  | 1%                       |
|                                           | Civil status         | 0%                  | 0%                       | 10%                 | 5%                       |
|                                           | Nationality mother   | 1%                  | 3%                       | 17%                 | 17%                      |
|                                           | Nationality father   | 3%                  | 4%                       | 25%                 | 20%                      |
|                                           | Nationality parents* | 3%                  | 5%                       | 27%                 | 23%                      |
|                                           | Education mother     | -                   | 1%                       | -                   | 0%                       |
| <b>Regional factors</b>                   | Education father     | -                   | 1%                       | -                   | 1%                       |
|                                           | Education parents*   | -                   | 1%                       | -                   | 1%                       |
|                                           | Altitude             | 0%                  | 0%                       | 10%                 | 6%                       |
| <b>Regional factors</b>                   | Urbanization         | 10%                 | 12%                      | 0%                  | 0%                       |
|                                           | Language region      | 23%                 | 25%                      | 62%                 | 63%                      |
| <b>In addition to all other variables</b> |                      |                     |                          |                     |                          |
| <b>Pregnancy factors</b>                  | Gestational age      | -                   | -                        | 12%                 | 12%                      |
|                                           | Sex                  | 0%                  | 0%                       | 0%                  | 1%                       |
|                                           | Birth rank           | 1%                  | 0%                       | 3%                  | 1%                       |
| <b>Parental factors</b>                   | Maternal age         | 0%                  | 1%                       | 0%                  | 0%                       |
|                                           | Civil status         | 0%                  | 0%                       | 0%                  | 0%                       |
|                                           | Nationality mother   | 0%                  | 0%                       | 1%                  | 2%                       |
|                                           | Nationality father   | 1.5%                | 0%                       | 1%                  | 0%                       |
|                                           | Nationality parents* | 2.5%                | 0%                       | 3%                  | 4%                       |
|                                           | Education mother     | -                   | 2%                       | -                   | 0%                       |
| <b>Regional factors</b>                   | Education father     | -                   | 0%                       | -                   | 0%                       |
|                                           | Education parents*   | -                   | 2%                       | -                   | 1%                       |
|                                           | Altitude             | 0%                  | 0%                       | 9%                  | 4%                       |
| <b>Regional factors</b>                   | Urbanization         | 9%                  | 10%                      | 0%                  | 1%                       |
|                                           | Language region      | 17%                 | 21%                      | 22%                 | 24%                      |
| <b>Model 3 (full)</b>                     |                      | <b>31%</b>          | <b>39%</b>               | <b>87%</b>          | <b>88%</b>               |

- Data not available

\* Nationality or educational attainment of both mother and father were entered into the model.



## FIGURE LEGENDS

**Figure 1.** Maps of average gestational age (upper two panels) and birth weight (lower two panels) observed across 705 Swiss areas. Left: all eligible live births ( $n=315,177$ ), right: complete case population ( $n=81,968$ ). The orientation of the maps is standard, with North being up.

**Figure 2.** Maps of gestational age and birth weight from crude model (model 0) and multivariable linear mixed-effect models (models 1-3) with percent reduction in the regional variation, represented by random effects. Analyses based on complete case population ( $N = 81,968$ ). The orientation of the maps is standard, with North being up.

## FOOTNOTES

**Contributors:** ME and CEK conceived the study and obtained funding. VS, ME, MZ and CEK developed the analysis plan. VS did all statistical analyses and wrote the first draft of the paper, which was revised by ME and VS, taking into account the critical comments from MZ, MA, NL and CEK. All authors approved the final version of the report. ME supervised the study.

**Funding:** The Swiss National Cohort is funded by the Swiss National Science Foundation (SNSF) cohort grant No. 148415. The current analysis was funded by SNSF project grant No. 163452. ME was supported by special SNSF project funding (grant No. 174281).

**Competing interests:** None declared.

**Patient consent:** Not required.

**Ethics approval:** The SNC has been approved by the Ethics Committee of the Canton of Bern.

**Provenance and peer review:** Not commissioned; externally peer reviewed.

**Data sharing statement:** The data used in this study may be requested from the Federal Office of Statistics.



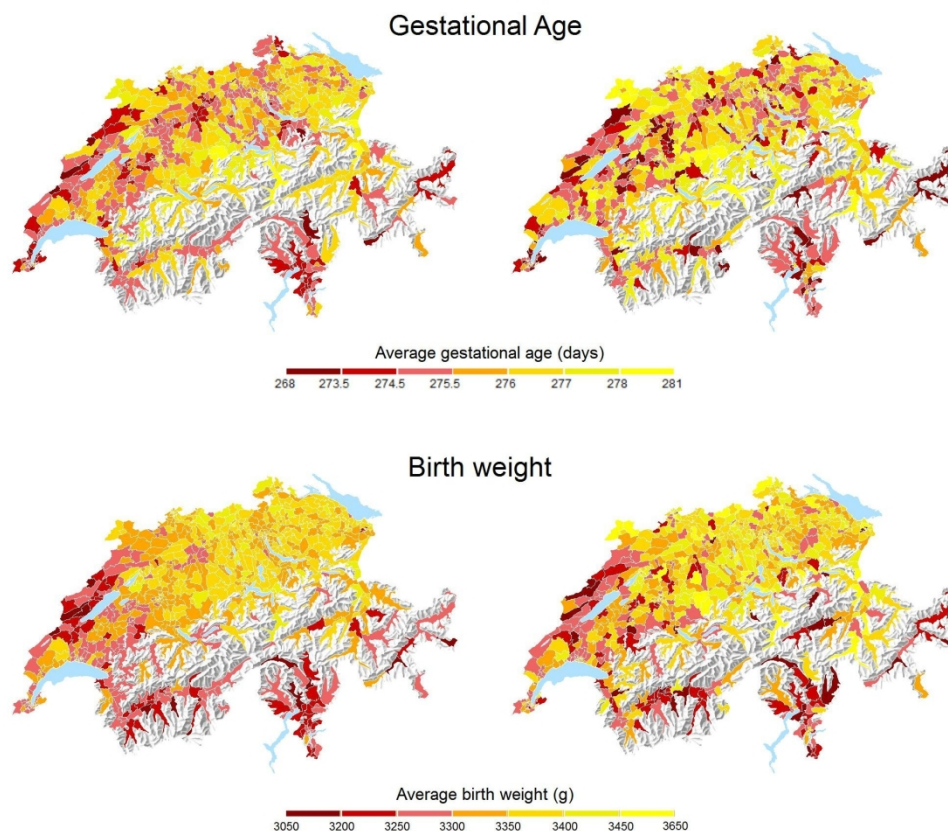

35 Figure 1. Maps of average gestational age (upper two panels) and birth weight (lower two panels) observed  
36 across 705 Swiss areas. Left: all eligible live births (n=315,177), right: complete case population  
37 (n=81,968). The orientation of the maps is standard, with North being up.

38 718x633mm (72 x 72 DPI)

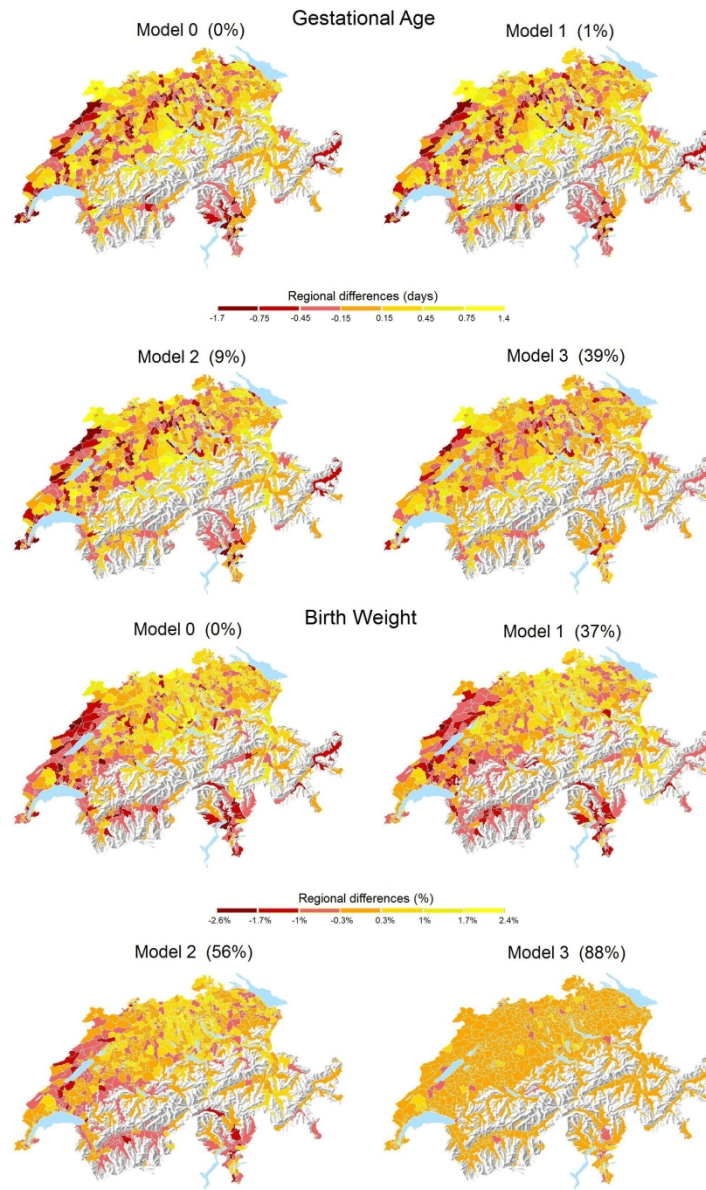

45 Figure 2. Maps of gestational age and birth weight from crude model (model 0) and multivariable linear  
46 mixed-effect models (models 1-3) with percent reduction in the regional variation, represented by random  
47 effects. Analyses based on complete case population (N = 81,968). The orientation of the maps is standard,  
48 with North being up.

49 718x1164mm (72 x 72 DPI)

## SUPPLEMENTARY MATERIALS

Supplementary Table S1. Number of live births, mean gestational age and mean birth weight by maternal nationality in the eligible population (N = 315'177).

| Nationality               | N              | Gestational age (days)<br>Mean (SD) | Birth weight (g)<br>Mean (SD) |
|---------------------------|----------------|-------------------------------------|-------------------------------|
| Switzerland               | 194,570        | 276 (12)                            | 3322 (511)                    |
| <b>Southern Europe</b>    |                |                                     |                               |
| Andorra                   | 1              | 279 (-)                             | 3080 (-)                      |
| Italy                     | 8337           | 275 (12)                            | 3271 (496)                    |
| Malta                     | 13             | 273 (8)                             | 3188 (427)                    |
| Portugal                  | 12,368         | 276 (12)                            | 3235 (493)                    |
| San Marino                | 2              | 274 (1.4)                           | 3485 (120)                    |
| Spain                     | 2864           | 276 (12)                            | 3263 (488)                    |
| <b>Western Europe</b>     |                |                                     |                               |
| Austria                   | 1555           | 275 (14)                            | 3328 (528)                    |
| Belgium                   | 583            | 276 (12)                            | 3357 (482)                    |
| Germany                   | 16,736         | 276 (13)                            | 3369 (517)                    |
| France                    | 6173           | 276 (12)                            | 3294 (505)                    |
| Lichtenstein              | 100            | 275 (11)                            | 3369 (488)                    |
| Luxembourg                | 55             | 276 (19)                            | 3396 (636)                    |
| Netherlands               | 803            | 276 (12)                            | 3377 (529)                    |
| <b>Northern Europe</b>    |                |                                     |                               |
| Denmark                   | 271            | 276 (13)                            | 3383 (511)                    |
| Estonia                   | 81             | 279 (7)                             | 3601 (466)                    |
| Finland                   | 312            | 276 (11)                            | 3465 (523)                    |
| Ireland                   | 212            | 276 (16)                            | 3446 (548)                    |
| Iceland                   | 31             | 272 (25)                            | 3180 (775)                    |
| Latvia                    | 187            | 279 (9)                             | 3493 (434)                    |
| Lithuania                 | 152            | 277 (13)                            | 3450 (535)                    |
| Norway                    | 110            | 275 (11)                            | 3390 (525)                    |
| Sweden                    | 571            | 276 (12)                            | 3422 (470)                    |
| UK                        | 1768           | 276 (13)                            | 3397 (513)                    |
| <b>Eastern Europe</b>     |                |                                     |                               |
| Czech Republic            | 623            | 275 (12)                            | 3339 (499)                    |
| Hungary                   | 913            | 275 (13)                            | 3341 (512)                    |
| Poland                    | 1778           | 276 (12)                            | 3399 (497)                    |
| Slovakia                  | 1068           | 276 (12)                            | 3348 (509)                    |
| Albania                   | 209            | 276 (12)                            | 3406 (476)                    |
| Bosnia & Herzegovina      | 1952           | 276 (12)                            | 3466 (492)                    |
| Croatia                   | 1582           | 276 (12)                            | 3448 (540)                    |
| Kosovo                    | 10,278         | 276 (13)                            | 3421 (530)                    |
| Macedonia                 | 5842           | 276 (13)                            | 3392 (514)                    |
| Montenegro                | 212            | 276 (10)                            | 3416 (466)                    |
| Serbia                    | 5195           | 276 (13)                            | 3400 (536)                    |
| Serbia & Montenegro       | 10             | 277 (8)                             | 3637 (250)                    |
| Slovenia                  | 163            | 275 (15)                            | 3366 (589)                    |
| Cyprus                    | 15             | 278 (8)                             | 3411 (525)                    |
| Bulgaria                  | 406            | 273 (15)                            | 3291 (559)                    |
| Greece                    | 375            | 274 (13)                            | 3317 (516)                    |
| Romania                   | 971            | 274 (14)                            | 3284 (537)                    |
| Turkey                    | 4441           | 275 (13)                            | 3347 (523)                    |
| Belarus                   | 172            | 277 (13)                            | 3385 (508)                    |
| Moldova                   | 135            | 276 (10)                            | 3496 (515)                    |
| Russia                    | 1567           | 277 (12)                            | 3427 (513)                    |
| Ukraine                   | 855            | 277 (11)                            | 3412 (473)                    |
| <b>Other (non-Europe)</b> |                |                                     |                               |
| 6 most numerous:          |                |                                     |                               |
| Eritrea                   | 2600           | 279 (14)                            | 3380 (528)                    |
| Brazil                    | 2381           | 274 (12)                            | 3312 (498)                    |
| Sri Lanka                 | 1391           | 273 (14)                            | 3158 (553)                    |
| USA                       | 1291           | 276 (14)                            | 3378 (532)                    |
| China                     | 1293           | 276 (13)                            | 3425 (541)                    |
| Morocco                   | 1159           | 276 (14)                            | 3378 (536)                    |
| ...                       |                |                                     |                               |
| <b>Total</b>              | <b>315,177</b> | <b>276 (12)</b>                     | <b>3328 (515)</b>             |

**Supplementary Table S2. Comparison of results from fully adjusted model (model 3) accounting and not accounting for spatial autocorrelation. Based on complete-case population (N = 81,968).**

|                                 | Accounting for spatial autocorrelation                     |                                                        | Not accounting for spatial autocorrelation                 |                                                        |
|---------------------------------|------------------------------------------------------------|--------------------------------------------------------|------------------------------------------------------------|--------------------------------------------------------|
|                                 | Gestational age (days)<br>Absolute differences<br>(95% CI) | Birth weight (g) *<br>Relative differences<br>(95% CI) | Gestational age (days)<br>Absolute differences<br>(95% CI) | Birth weight (g) *<br>Relative differences<br>(95% CI) |
| Intercept                       | 277.9 (277.6 to 278.1)                                     | 3293 (3163 to 3427)                                    | 277.9 (277.7 to 278.2)                                     | 3298 (3180 to 3420) &                                  |
| <b>Sex</b>                      |                                                            |                                                        |                                                            |                                                        |
| <sup>¶</sup> Female             | 0                                                          |                                                        | 0                                                          | 1                                                      |
| Male                            | -0.62 (-0.78, -0.46)                                       | 1.048 (1.046, 1.049)                                   | -0.63 (-0.79, -0.47)                                       | 1.048 (1.046, 1.049)                                   |
| <b>Birth rank</b>               |                                                            |                                                        |                                                            |                                                        |
| 1 <sup>¶</sup>                  | 0                                                          |                                                        | 0                                                          | 1                                                      |
| 2                               | -0.34 (-0.52, -0.17)                                       | 1.039 (1.037, 1.041)                                   | -0.34 (-0.52, -0.16)                                       | 1.039 (1.037, 1.041)                                   |
| 3                               | -0.17 (-0.45, 0.10)                                        | 1.054 (1.051, 1.056)                                   | -0.16 (-0.44, 0.11)                                        | 1.054 (1.051, 1.057)                                   |
| ≥ 4                             | 0.23 (-0.26, 0.71)                                         | 1.065 (1.059, 1.070)                                   | 0.24 (-0.25, 0.72)                                         | 1.065 (1.059, 1.070)                                   |
| <b>Maternal age (yrs) ‡</b>     |                                                            |                                                        |                                                            |                                                        |
| ≥ 20-30 <sup>¶</sup>            | 0                                                          |                                                        | 0                                                          | 1                                                      |
| ≥ 30-40 yrs (per 5 yrs)         | -0.92 (-1.06, -0.77)                                       | 0.998 (0.996, 1.000)                                   | -0.93 (-1.07, -0.78)                                       | 0.998 (0.997, 1.000)                                   |
| ≥ 40 yrs (per 5 yrs)            | -3.48 (-4.30, -2.66)                                       | 0.998 (0.990, 1.006)                                   | -3.46 (-4.29, -2.63)                                       | 0.998 (0.990, 1.006)                                   |
| <b>Civil status<sup>§</sup></b> |                                                            |                                                        |                                                            |                                                        |
| Married <sup>¶</sup>            | 0                                                          |                                                        | 0                                                          | 1                                                      |
| Not married                     | 0.15 (-0.08, 0.38)                                         | 0.993 (0.990, 0.995)                                   | 0.15 (-0.08, 0.38)                                         | 0.993 (0.990, 0.995)                                   |
| <b>Nationality mother</b>       |                                                            |                                                        |                                                            |                                                        |
| Switzerland <sup>¶</sup>        | 0                                                          |                                                        | 0                                                          | 1                                                      |
| S Europe                        | 0.38 (0.00, 0.77)                                          | 0.995 (0.992, 0.999)                                   | 0.39 (0.00, 0.78)                                          | 0.995 (0.991, 0.999)                                   |
| W Europe                        | -0.08 (-0.42, 0.25)                                        | 1.007 (1.003, 1.010)                                   | -0.08 (-0.43, 0.26)                                        | 1.007 (1.004, 1.011)                                   |
| N Europe                        | 0.30 (-0.56, 1.17)                                         | 1.022 (1.013, 1.031)                                   | 0.30 (-0.57, 1.17)                                         | 1.022 (1.013, 1.031)                                   |
| E Europe                        | 0.33 (-0.01, 0.67)                                         | 1.017 (1.013, 1.021)                                   | 0.33 (-0.01, 0.68)                                         | 1.017 (1.014, 1.021)                                   |
| Other                           | -0.66 (-1.03, -0.29)                                       | 1.012 (1.008, 1.015)                                   | -0.67 (-1.05, -0.30)                                       | 1.012 (1.008, 1.016)                                   |
| <b>Nationality father</b>       |                                                            |                                                        |                                                            |                                                        |
| Switzerland <sup>¶</sup>        | 0                                                          |                                                        | 0                                                          | 1                                                      |
| S Europe                        | -0.28 (-0.61, 0.06)                                        | 0.992 (0.989, 0.996)                                   | -0.28 (-0.62, 0.06)                                        | 0.993 (0.989, 0.996)                                   |
| W Europe                        | 0.30 (-0.03, 0.64)                                         | 1.006 (1.002, 1.009)                                   | 0.30 (-0.04, 0.63)                                         | 1.006 (1.003, 1.010)                                   |
| N Europe                        | -0.21 (-1.06, 0.63)                                        | 1.011 (1.002, 1.019)                                   | -0.24 (-1.09, 0.62)                                        | 1.011 (1.003, 1.020)                                   |
| E Europe                        | -0.02 (-0.38, 0.35)                                        | 1.011 (1.007, 1.015)                                   | -0.01 (-0.38, 0.36)                                        | 1.011 (1.008, 1.015)                                   |
| Other                           | 0.49 (0.06, 0.91)                                          | 0.991 (0.987, 0.996)                                   | 0.48 (0.05, 0.90)                                          | 0.992 (0.987, 0.996)                                   |
| <b>Education mother</b>         |                                                            |                                                        |                                                            |                                                        |
| Tertiary <sup>¶</sup>           | 0                                                          |                                                        | 0                                                          | 1                                                      |
| Secondary                       | -0.56 (-0.75, -0.37)                                       | 0.997 (0.995, 0.999)                                   | -0.55 (-0.74, -0.36)                                       | 0.996 (0.995, 0.998)                                   |
| Compulsory                      | -0.92 (-1.23, -0.60)                                       | 0.993 (0.990, 0.997)                                   | -0.90 (-1.22, -0.58)                                       | 0.993 (0.990, 0.996)                                   |
| <b>Education father</b>         |                                                            |                                                        |                                                            |                                                        |
| Tertiary <sup>¶</sup>           | 0                                                          |                                                        | 0                                                          | 1                                                      |
| Secondary                       | -0.16 (-0.35, 0.03)                                        | 0.997 (0.995, 0.999)                                   | -0.16 (-0.35, 0.03)                                        | 0.996 (0.994, 0.998)                                   |
| Compulsory                      | -0.25 (-0.57, 0.07)                                        | 0.997 (0.994, 1.001)                                   | -0.25 (-0.58, 0.07)                                        | 0.997 (0.994, 1.000)                                   |
| <b>Altitude (m)</b>             |                                                            |                                                        |                                                            |                                                        |
| 500 <sup>¶</sup>                | 0                                                          |                                                        | 0                                                          | 1                                                      |
| per 500 m increase              | -0.05 (-0.33, 0.24)                                        | 0.991 (0.987, 0.994)                                   | 0.03 (-0.24, 0.30)                                         | 0.989 (0.987, 0.992)                                   |
| <b>Urbanization</b>             |                                                            |                                                        |                                                            |                                                        |
| Urban <sup>¶</sup>              | 0                                                          |                                                        | 0                                                          | 1                                                      |
| Peri-urban                      | -0.54 (-0.75, -0.33)                                       | 1.001 (0.998, 1.004)                                   | -0.59 (-0.82, -0.36)                                       | 1.003 (1.000, 1.005)                                   |
| Rural                           | -0.25 (-0.50, 0.00)                                        | 1.003 (0.999, 1.006)                                   | -0.29 (-0.55, -0.02)                                       | 1.003 (1.001, 1.006)                                   |
| <b>Language region</b>          |                                                            |                                                        |                                                            |                                                        |
| German <sup>¶</sup>             | 0                                                          |                                                        | 0                                                          | 1                                                      |
| French                          | -0.33 (-0.75, 0.09)                                        | 0.991 (0.983, 0.998)                                   | -0.66 (-0.88, -0.44)                                       | 0.988 (0.985, 0.990)                                   |
| Italian                         | -1.10 (-1.50, -0.70)                                       | 0.984 (0.978, 0.989)                                   | -1.11 (-1.55, -0.68)                                       | 0.983 (0.979, 0.987)                                   |

\*Birth weight was modelled on a log scale, which results in multiplicative effects. The model for birth weight was additionally adjusted for gestational age by a cubic spline function with knots at weeks 25, 30 and 35.

& In the model for BW, the intercept corresponds to an estimated mean birth weight (g) for a singleton girl born at gestational age 40 weeks as the first child (rank 1) in a German-speaking, urban region of elevation 500 m, whose mother is 20-30 years old at birth and married, and both parents have Swiss nationality and tertiary education.

¶ Reference category

‡ Age modelled by a piece-wise linear function: constant at reference range ≥20-30, and separate slopes for age <20, ≥30-40, and ≥40. For ages ≥40, the total estimated effect is hence addition of 10-year effect in age group ≥30-40 plus the corresponding effect in age-group ≥40.

† Percentage of regional variance explained by model predictors, i.e. percent reduction in variance of random effects ( $\sigma^2$ ) when compared to model with no predictors (model 0).

**Supplementary Table S3. Comparison of results from model (model 3) for birth weight, adjusted and not adjusted for gestational age.**

|                                     | Birth weight - Model 3 without Gestational Age |                          | Birth weight - Model 3 with Gestational Age* |                                  |
|-------------------------------------|------------------------------------------------|--------------------------|----------------------------------------------|----------------------------------|
|                                     | Relative differences (95% CI)                  |                          |                                              |                                  |
|                                     | Eligible population                            | Complete case population | Eligible population                          | Complete case population         |
| <b>Intercept</b>                    | 3188 (3181 to 3195)                            | 3209 (3196 to 3222)      | 3278 (3218 to 3339) <sup>‡</sup>             | 3298 (3180 to 3420) <sup>‡</sup> |
| <b>Sex</b>                          |                                                |                          |                                              |                                  |
| <sup>¶</sup> Female                 | 1                                              | 1                        | 1                                            | 1                                |
| Male                                | 1.04 (1.038, 1.041)                            | 1.041 (1.039, 1.044)     | 1.045 (1.044 to 1.046)                       | 1.048 (1.046, 1.049)             |
| <b>Rank</b>                         |                                                |                          |                                              |                                  |
| 1 <sup>¶</sup>                      | 1                                              | 1                        | 1                                            | 1                                |
| 2                                   | 1.039 (1.038, 1.041)                           | 1.041 (1.038, 1.044)     | 1.038 (1.037, 1.039)                         | 1.039 (1.037, 1.041)             |
| 3                                   | 1.052 (1.049, 1.054)                           | 1.058 (1.054, 1.063)     | 1.050 (1.048, 1.051)                         | 1.054 (1.051, 1.057)             |
| ≥ 4                                 | 1.060 (1.056, 1.064)                           | 1.071 (1.063, 1.079)     | 1.058 (1.056, 1.061)                         | 1.065 (1.059, 1.070)             |
| <b>Age mother (yrs)<sup>‡</sup></b> |                                                |                          |                                              |                                  |
| < 20yrs (per 5 yrs decr.)           | 0.956 (0.935, 0.978)                           | -                        | 1.002 (0.987, 1.017)                         | -                                |
| ≥ 20-30 yrs <sup>¶</sup>            | 1                                              | 1                        | 1                                            | 1                                |
| ≥ 30-40 yrs (per 5 yrs)             | 0.991 (0.990, 0.992)                           | 0.990 (0.988, 0.993)     | 1.000 (1.000, 1.001)                         | 0.998 (0.997, 1.000)             |
| ≥ 40 yrs (per 5 yrs)                | 0.973 (0.967, 0.979)                           | 0.967 (0.955, 0.979)     | 0.998 (0.994, 1.003)                         | 0.998 (0.990, 1.006)             |
| <b>Civil status<sup>¶</sup></b>     |                                                |                          |                                              |                                  |
| Married <sup>¶</sup>                | 1                                              | 1                        | 1                                            | 1                                |
| Not married                         | 0.989 (0.987, 0.990)                           | 0.992 (0.989, 0.996)     | 0.990 (0.989, 0.991)                         | 0.993 (0.99, 0.995)              |
| <b>Nationality mother</b>           |                                                |                          |                                              |                                  |
| Switzerland <sup>¶</sup>            | 1                                              | 1                        | 1                                            | 1                                |
| S Europe                            | 0.996 (0.993, 0.999)                           | 0.999 (0.993, 1.005)     | 0.994 (0.992, 0.996)                         | 0.995 (0.991, 0.999)             |
| W Europe                            | 1.010 (1.007, 1.013)                           | 1.006 (1.001, 1.011)     | 1.008 (1.006, 1.010)                         | 1.007 (1.004, 1.011)             |
| N Europe                            | 1.027 (1.020, 1.034)                           | 1.024 (1.010, 1.037)     | 1.025 (1.020, 1.029)                         | 1.022 (1.013, 1.031)             |
| E Europe                            | 1.014 (1.011, 1.016)                           | 1.020 (1.015, 1.026)     | 1.013 (1.011, 1.014)                         | 1.017 (1.014, 1.021)             |
| Other                               | 1.003 (1.000, 1.006)                           | 1.005 (0.999, 1.010)     | 1.007 (1.005, 1.008)                         | 1.012 (1.008, 1.016)             |
| <b>Nationality father</b>           |                                                |                          |                                              |                                  |
| Switzerland <sup>¶</sup>            | 1                                              | 1                        | 1                                            | 1                                |
| S Europe                            | 0.988 (0.985, 0.991)                           | 0.991 (0.986, 0.996)     | 0.991 (0.990, 0.993)                         | 0.993 (0.989, 0.996)             |
| W Europe                            | 1.008 (1.005, 1.011)                           | 1.009 (1.004, 1.014)     | 1.008 (1.006, 1.009)                         | 1.006 (1.003, 1.010)             |
| N Europe                            | 1.017 (1.010, 1.024)                           | 1.007 (0.994, 1.019)     | 1.013 (1.009, 1.017)                         | 1.011 (1.003, 1.020)             |
| E Europe                            | 1.003 (1.000, 1.006)                           | 1.010 (1.004, 1.015)     | 1.009 (1.007, 1.010)                         | 1.011 (1.008, 1.015)             |
| Other                               | 0.990 (0.987, 0.993)                           | 0.997 (0.990, 1.003)     | 0.992 (0.991, 0.994)                         | 0.992 (0.987, 0.996)             |
| missing                             | 0.933 (0.928, 0.938)                           | -                        | 0.989 (0.985, 0.992)                         | -                                |
| <b>Education mother</b>             |                                                |                          |                                              |                                  |
| Tertiary <sup>¶</sup>               | -                                              | 1                        | -                                            | 1                                |
| Secondary                           | -                                              | 0.992 (0.989, 0.995)     | -                                            | 0.996 (0.995, 0.998)             |
| Compulsory                          | -                                              | 0.984 (0.979, 0.989)     | -                                            | 0.993 (0.990, 0.996)             |
| <b>Education father</b>             |                                                |                          |                                              |                                  |
| Tertiary <sup>¶</sup>               | -                                              | 1                        | -                                            | 1                                |
| Secondary                           | -                                              | 0.995 (0.992, 0.997)     | -                                            | 0.996 (0.994, 0.998)             |
| Compulsory                          | -                                              | 0.995 (0.990, 1.000)     | -                                            | 0.997 (0.994, 1.000)             |
| <b>Altitude (m)</b>                 |                                                |                          |                                              |                                  |
| 500 m <sup>¶</sup>                  | 1                                              | 1                        | 1                                            | 1                                |
| per 500 m increase                  | 0.990 (0.988, 0.992)                           | 0.989 (0.985, 0.993)     | 0.989 (0.988, 0.991)                         | 0.989 (0.987, 0.992)             |
| <b>Urbanization</b>                 |                                                |                          |                                              |                                  |
| Urban <sup>¶</sup>                  | 1                                              | 1                        | 1                                            | 1                                |
| Peri-urban                          | 0.998 (0.996, 1.000)                           | 0.998 (0.995, 1.002)     | 1.001 (1.000, 1.002)                         | 1.003 (1.000, 1.005)             |
| Rural                               | 0.999 (0.996, 1.001)                           | 1.001 (0.997, 1.005)     | 1.000 (0.998, 1.001)                         | 1.003 (1.001, 1.006)             |
| <b>Language region</b>              |                                                |                          |                                              |                                  |
| <sup>¶</sup> German <sup>¶</sup>    | 1                                              | 1                        | 1                                            | 1                                |
| French                              | 0.985 (0.983, 0.987)                           | 0.983 (0.980, 0.986)     | 0.989 (0.987, 0.990)                         | 0.988 (0.985, 0.990)             |
| Italian                             | 0.977 (0.973, 0.981)                           | 0.976 (0.970, 0.982)     | 0.982 (0.980, 0.985)                         | 0.983 (0.979, 0.987)             |
| <b>% variation explained</b>        |                                                |                          |                                              |                                  |
| Model 3                             | 77%                                            | 76%                      | 87%                                          | 88%                              |
| Model 2                             | 25%                                            | 27%                      | 52%                                          | 56%                              |
| Model 1                             | 2%                                             | 5%                       | 31%                                          | 37%                              |

\*Birth weight was modelled on a log scale, which results in multiplicative effects.

<sup>¶</sup> Reference category

<sup>‡</sup> Age modelled by a piece-wise linear function: constant at reference range ≥20-30, and separate slopes for age <20, ≥30-40, and ≥40. For ages ≥40, the total estimated effect is hence addition of 10-year effect in age group ≥30-40 plus the corresponding effect in age-group ≥40.

<sup>†</sup> Percentage of regional variance explained by model predictors, i.e. percent reduction in variance of random effects ( $\sigma^2$ ) when compared to model with no predictors (model 0).



**Supplementary Table S4. Comparison of results from fully adjusted model without and with additionally including Swiss neighbourhood index of socio-economic position (SEP). Based on eligible population (N = 315,177).**

|                                     | Model 3 without SEP                                        |                                                        | Model 3 with SEP                                           |                                                        |
|-------------------------------------|------------------------------------------------------------|--------------------------------------------------------|------------------------------------------------------------|--------------------------------------------------------|
|                                     | Gestational age (days)<br>Absolute differences<br>(95% CI) | Birth weight (g) *<br>Relative differences<br>(95% CI) | Gestational age (days)<br>Absolute differences<br>(95% CI) | Birth weight (g) *<br>Relative differences<br>(95% CI) |
| <b>Intercept</b>                    | 277.3 (277.2 to 277.5)                                     | 3278 (3218 to 3339) <sup>&amp;</sup>                   | 277.3 (277.2 to 277.5)                                     | 3278 (3218 to 3339) <sup>&amp;</sup>                   |
| <b>Sex</b>                          |                                                            |                                                        |                                                            |                                                        |
| <sup>¶</sup> Female                 | 0                                                          | 1                                                      | 0                                                          | 1                                                      |
| Male                                | -0.56 (-0.65, -0.48)                                       | 1.045 (1.044 to 1.046)                                 | -0.56 (-0.65, -0.48)                                       | 1.045 (1.044 to 1.046)                                 |
| <b>Birth rank</b>                   |                                                            |                                                        |                                                            |                                                        |
| 1 <sup>¶</sup>                      | 0                                                          | 1                                                      | 0                                                          | 1                                                      |
| 2                                   | -0.39 (-0.49, -0.29)                                       | 1.038 (1.037, 1.039)                                   | -0.39 (-0.49, -0.29)                                       | 1.038 (1.037, 1.039)                                   |
| 3                                   | -0.37 (-0.52, -0.22)                                       | 1.050 (1.048, 1.051)                                   | -0.37 (-0.52, -0.22)                                       | 1.050 (1.048, 1.051)                                   |
| ≥ 4                                 | -0.24 (-0.50, 0.02)                                        | 1.058 (1.056, 1.061)                                   | -0.24 (-0.49, 0.02)                                        | 1.058 (1.056, 1.061)                                   |
| <b>Age mother (yrs)<sup>‡</sup></b> |                                                            |                                                        |                                                            |                                                        |
| < 20 (per 5 yrs decr.)              | -4.10 (-5.59, -2.61)                                       | 1.002 (0.987, 1.017)                                   | -4.10 (-5.59, -2.61)                                       | 1.002 (0.987, 1.017)                                   |
| 20 - <30 <sup>¶</sup>               | 0                                                          | 1                                                      | 0                                                          | 1                                                      |
| ≥ 30-40 (per 5 yrs)                 | -0.99 (-1.06, -0.91)                                       | 1.000 (1.000, 1.001)                                   | -0.99 (-1.07, -0.92)                                       | 1.000 (1.000, 1.001)                                   |
| ≥ 40 (per 5 yrs)                    | -2.93 (-3.36, -2.50)                                       | 0.998 (0.994, 1.003)                                   | -2.92 (-3.35, -2.50)                                       | 0.998 (0.994, 1.003)                                   |
| <b>Civil status<sup>◊</sup></b>     |                                                            |                                                        |                                                            |                                                        |
| Married                             | 0                                                          | 1                                                      | 0                                                          | 1                                                      |
| Not married                         | -0.01 (-0.13, 0.10)                                        | 0.990 (0.989, 0.991)                                   | -0.01 (-0.13, 0.10)                                        | 0.990 (0.989, 0.991)                                   |
| <b>Nationality mother</b>           |                                                            |                                                        |                                                            |                                                        |
| Switzerland <sup>¶</sup>            | 0                                                          | 1                                                      | 0                                                          | 1                                                      |
| S Europe                            | 0.20 (-0.01, 0.40)                                         | 0.994 (0.992, 0.996)                                   | 0.20 (0.00, 0.41)                                          | 0.994 (0.992, 0.996)                                   |
| W Europe                            | 0.20 (0.02, 0.38)                                          | 1.008 (1.006, 1.010)                                   | 0.20 (0.02, 0.37)                                          | 1.008 (1.006, 1.010)                                   |
| N Europe                            | 0.37 (-0.07, 0.81)                                         | 1.025 (1.020, 1.029)                                   | 0.36 (-0.08, 0.80)                                         | 1.025 (1.020, 1.029)                                   |
| E Europe                            | 0.21 (0.04, 0.38)                                          | 1.013 (1.011, 1.014)                                   | 0.22 (0.05, 0.39)                                          | 1.013 (1.011, 1.015)                                   |
| Other                               | -0.32 (-0.49, -0.14)                                       | 1.007 (1.005, 1.008)                                   | -0.31 (-0.48, -0.14)                                       | 1.007 (1.005, 1.008)                                   |
| <b>Nationality father</b>           |                                                            |                                                        |                                                            |                                                        |
| Switzerland <sup>¶</sup>            | 0                                                          | 1                                                      | 0                                                          | 1                                                      |
| S Europe                            | -0.46 (-0.64, -0.28)                                       | 0.991 (0.990, 0.993)                                   | -0.45 (-0.63, -0.27)                                       | 0.992 (0.99, 0.993)                                    |
| W Europe                            | 0.07 (-0.11, 0.25)                                         | 1.008 (1.006, 1.009)                                   | 0.07 (-0.11, 0.25)                                         | 1.008 (1.006, 1.009)                                   |
| N Europe                            | 0.51 (0.08, 0.94)                                          | 1.013 (1.009, 1.017)                                   | 0.50 (0.07, 0.93)                                          | 1.013 (1.009, 1.017)                                   |
| E Europe                            | -0.46 (-0.64, -0.28)                                       | 1.009 (1.007, 1.010)                                   | -0.45 (-0.63, -0.27)                                       | 1.009 (1.007, 1.011)                                   |
| Other                               | -0.02 (-0.22, 0.18)                                        | 0.992 (0.991, 0.994)                                   | -0.01 (-0.21, 0.19)                                        | 0.993 (0.991, 0.995)                                   |
| missing                             | -3.87 (-4.24, -3.50)                                       | 0.989 (0.985, 0.992)                                   | -3.86 (-4.23, -3.49)                                       | 0.989 (0.985, 0.993)                                   |
| <b>SEP index</b>                    |                                                            |                                                        |                                                            |                                                        |
| 1st quintile                        | -                                                          | -                                                      | -0.08 (-0.25, 0.08)                                        | 0.997 (0.996, 0.999)                                   |
| 2nd quintile                        | -                                                          | -                                                      | -0.09 (-0.24, 0.06)                                        | 0.998 (0.997, 1.000)                                   |
| 3rd quintile                        | -                                                          | -                                                      | -0.02 (-0.17, 0.13)                                        | 0.998 (0.997, 0.999)                                   |
| 4th quintile                        | -                                                          | -                                                      | 0.02 (-0.12, 0.17)                                         | 1.000 (0.999, 1.002)                                   |
| 5th quintile <sup>¶</sup>           | -                                                          | -                                                      | 0                                                          | 1                                                      |
| <b>Altitude (m)</b>                 |                                                            |                                                        |                                                            |                                                        |
| 500 <sup>¶</sup>                    | 0                                                          | 1                                                      | 0                                                          | 1                                                      |
| per 500 m increase                  | 0.07 (-0.09, 0.23)                                         | 0.989 (0.988, 0.991)                                   | 0.08 (-0.08, 0.23)                                         | 0.989 (0.988, 0.991)                                   |
| <b>Urbanization</b>                 |                                                            |                                                        |                                                            |                                                        |
| Urban <sup>¶</sup>                  | 0                                                          | 1                                                      | 0                                                          | 1                                                      |
| Peri-urban                          | -0.43 (-0.57, -0.28)                                       | 1.001 (1.000, 1.002)                                   | -0.43 (-0.57, -0.28)                                       | 1.001 (1.000, 1.002)                                   |
| Rural                               | -0.15 (-0.32, 0.02)                                        | 1.000 (0.998, 1.001)                                   | -0.13 (-0.30, 0.04)                                        | 1.001 (0.999, 1.002)                                   |
| <b>Language region</b>              |                                                            |                                                        |                                                            |                                                        |
| German <sup>¶</sup>                 | 0                                                          | 1                                                      | 0                                                          | 1                                                      |
| French                              | -0.62 (-0.77, -0.47)                                       | 0.989 (0.987, 0.990)                                   | -0.61 (-0.76, -0.46)                                       | 0.989 (0.987, 0.990)                                   |
| Italian                             | -0.94 (-1.26, -0.63)                                       | 0.982 (0.980, 0.985)                                   | -0.93 (-1.24, -0.61)                                       | 0.982 (0.980, 0.985)                                   |
| <b>% variation explained</b>        |                                                            |                                                        |                                                            |                                                        |
| Full model                          | 31%                                                        | 87%                                                    | 31%                                                        | 88%                                                    |
| Model without Lang. region          | 14%                                                        | 66%                                                    | 15%                                                        | 68%                                                    |

\*Birth weight was modelled on a log scale, which results in multiplicative effects. The model for birth weight was additionally adjusted for gestational age by a cubic spline function with knots at weeks 25, 30 and 35.

<sup>&</sup> In the model for BW, the intercept corresponds to an estimated mean birth weight (g) for a singleton girl born at gestational age 40 weeks as the first child (rank 1) in a German-speaking, urban region of elevation 500m, whose mother is 20-30 years old at birth and married, and both parents have Swiss nationality and tertiary education.

<sup>¶</sup> Reference category

<sup>‡</sup> Age modelled by a piece-wise linear function: constant at reference range ≥20-30, and separate slopes for age <20, ≥30-40, and ≥40.

<sup>◊</sup> Married or in registered partnership / Not married: Single, widow, divorced or in dissolved partnership

1  
2  
3 † Percentage of regional variance explained by model predictors, i.e. percent reduction in variance of random effects ( $\sigma^2$ ) when compared  
4 to model with no predictors (model 0).  
5  
6  
7  
8  
9  
10  
11  
12  
13  
14  
15  
16  
17  
18  
19  
20  
21  
22  
23  
24  
25  
26  
27  
28  
29  
30  
31  
32  
33  
34  
35  
36  
37  
38  
39  
40  
41  
42  
43  
44  
45  
46  
47  
48  
49  
50  
51  
52  
53  
54  
55  
56  
57  
58  
59  
60

For peer review only

Supplementary Figure S1. Selection of eligible and complete case study populations among live births in Switzerland 2011 to 2014.

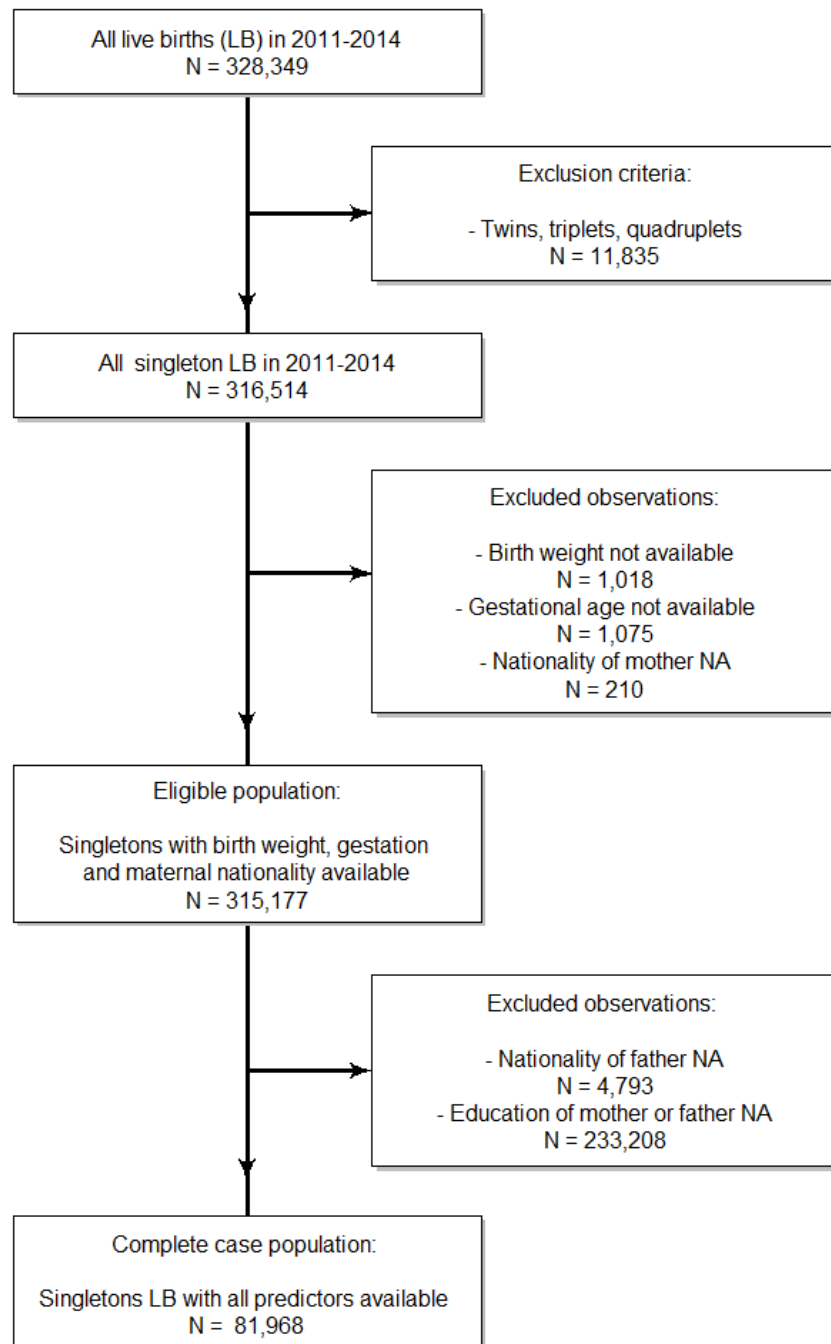



Supplementary Figure S2. Relationship between birth weight and gestational age at birth modeled by a cubic spline function. Separate fitted curves are shown for newborn girls and boys, with all other predictors corresponding to the reference categories shown in Table 2.

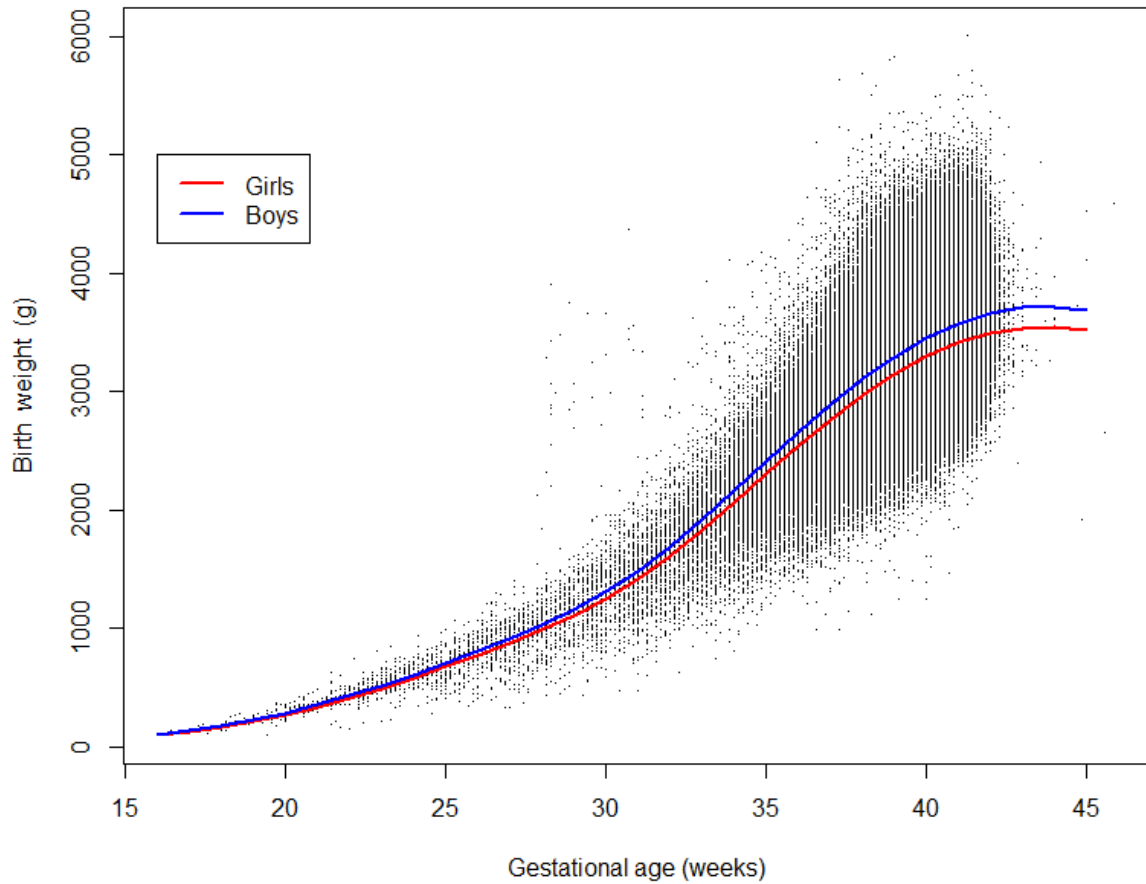

Supplementary Figure S3. Relationship between mean gestational age and proportion of preterm live births (<37 weeks) among eligible live births across 705 regions (upper panel) and between mean birth weight and proportion of low birth weight births (<2500g) (lower panel). Results from linear regression weighted by the number of live births in each region. Prediction intervals displayed for an average-size region (n=447). GA = gestational age; BW= birth weight; 276 days correspond to 39<sup>3/7</sup> weeks.

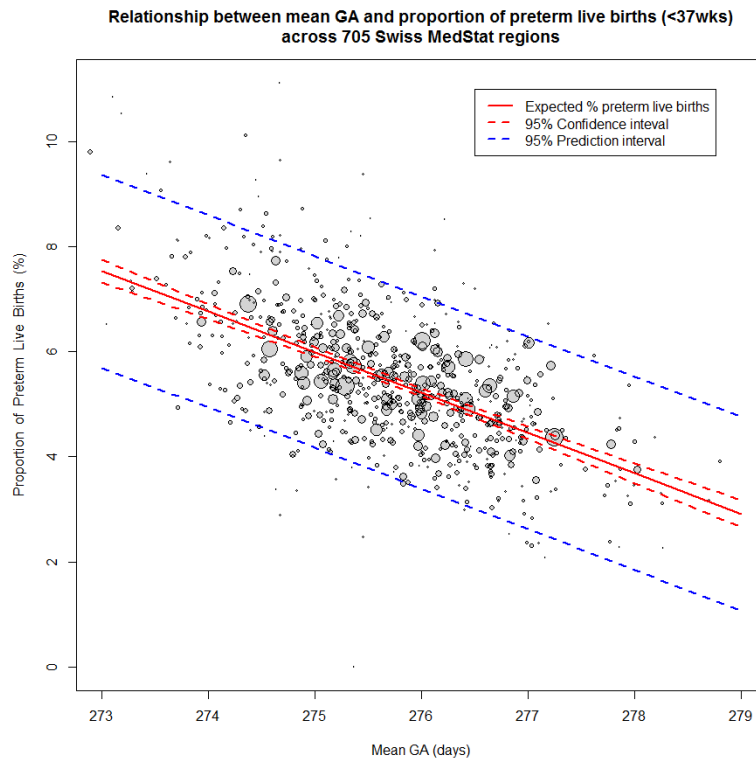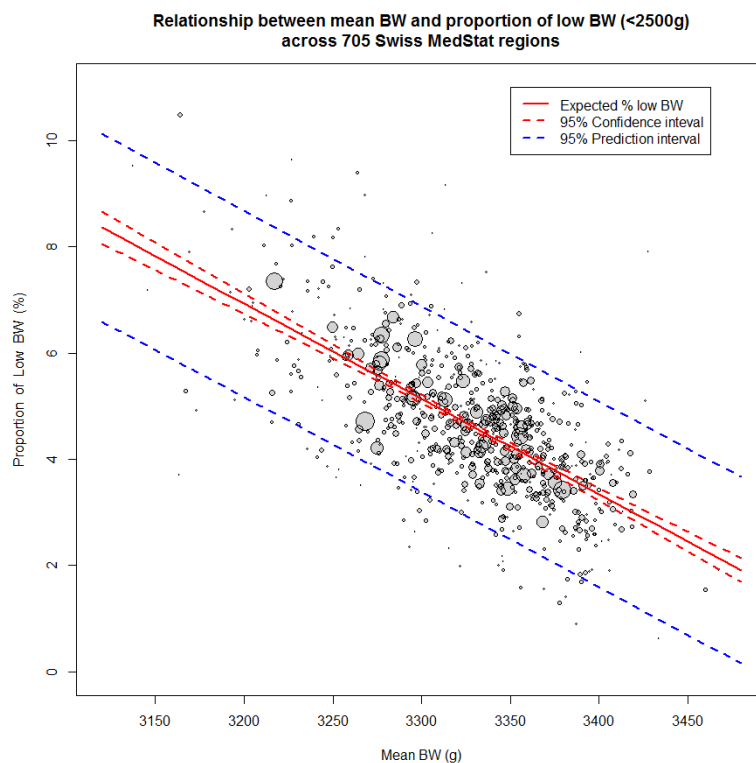

## STROBE Statement—checklist of items that should be included in reports of observational studies

|                              | Item No | Recommendation                                                                                                                                                                                                                                                                                                                                                                                                                                                         | Page No |
|------------------------------|---------|------------------------------------------------------------------------------------------------------------------------------------------------------------------------------------------------------------------------------------------------------------------------------------------------------------------------------------------------------------------------------------------------------------------------------------------------------------------------|---------|
| <b>Title and abstract</b>    | 1       | (a) Indicate the study's design with a commonly used term in the title or the abstract                                                                                                                                                                                                                                                                                                                                                                                 | 1       |
|                              |         | (b) Provide in the abstract an informative and balanced summary of what was done and what was found                                                                                                                                                                                                                                                                                                                                                                    | 2       |
| <b>Introduction</b>          |         |                                                                                                                                                                                                                                                                                                                                                                                                                                                                        |         |
| Background/rationale         | 2       | Explain the scientific background and rationale for the investigation being reported                                                                                                                                                                                                                                                                                                                                                                                   | 4       |
| Objectives                   | 3       | State specific objectives, including any prespecified hypotheses                                                                                                                                                                                                                                                                                                                                                                                                       | 4       |
| <b>Methods</b>               |         |                                                                                                                                                                                                                                                                                                                                                                                                                                                                        |         |
| Study design                 | 4       | Present key elements of study design early in the paper                                                                                                                                                                                                                                                                                                                                                                                                                | 5       |
| Setting                      | 5       | Describe the setting, locations, and relevant dates, including periods of recruitment, exposure, follow-up, and data collection                                                                                                                                                                                                                                                                                                                                        | 6       |
| Participants                 | 6       | (a) <i>Cohort study</i> —Give the eligibility criteria, and the sources and methods of selection of participants. Describe methods of follow-up<br><i>Case-control study</i> —Give the eligibility criteria, and the sources and methods of case ascertainment and control selection. Give the rationale for the choice of cases and controls<br><i>Cross-sectional study</i> —Give the eligibility criteria, and the sources and methods of selection of participants | 6       |
|                              |         | (b) <i>Cohort study</i> —For matched studies, give matching criteria and number of exposed and unexposed<br><i>Case-control study</i> —For matched studies, give matching criteria and the number of controls per case                                                                                                                                                                                                                                                 |         |
| Variables                    | 7       | Clearly define all outcomes, exposures, predictors, potential confounders, and effect modifiers. Give diagnostic criteria, if applicable                                                                                                                                                                                                                                                                                                                               | 5       |
| Data sources/<br>measurement | 8*      | For each variable of interest, give sources of data and details of methods of assessment (measurement). Describe comparability of assessment methods if there is more than one group                                                                                                                                                                                                                                                                                   | 5       |
| Bias                         | 9       | Describe any efforts to address potential sources of bias                                                                                                                                                                                                                                                                                                                                                                                                              | 7       |
| Study size                   | 10      | Explain how the study size was arrived at                                                                                                                                                                                                                                                                                                                                                                                                                              | 8       |
| Quantitative variables       | 11      | Explain how quantitative variables were handled in the analyses. If applicable, describe which groupings were chosen and why                                                                                                                                                                                                                                                                                                                                           | 6       |
| Statistical methods          | 12      | (a) Describe all statistical methods, including those used to control for confounding                                                                                                                                                                                                                                                                                                                                                                                  | 6       |
|                              |         | (b) Describe any methods used to examine subgroups and interactions                                                                                                                                                                                                                                                                                                                                                                                                    | na      |
|                              |         | (c) Explain how missing data were addressed                                                                                                                                                                                                                                                                                                                                                                                                                            | 8       |
|                              |         | (d) <i>Cohort study</i> —If applicable, explain how loss to follow-up was addressed<br><i>Case-control study</i> —If applicable, explain how matching of cases and controls was addressed<br><i>Cross-sectional study</i> —If applicable, describe analytical methods taking account of sampling strategy                                                                                                                                                              | na      |
|                              |         | (e) Describe any sensitivity analyses                                                                                                                                                                                                                                                                                                                                                                                                                                  | 7       |

Continued on next page

1  
2  
3  
4  
5  
6  
7  
8  
9  
10  
11  
12  
13  
14  
15  
16  
17  
18  
19  
20  
21  
22  
23  
24  
25  
26  
27  
28  
29  
30  
31  
32  
33  
34  
35  
36  
37  
38  
39  
40  
41  
42  
43  
44  
45  
46  
47  
48  
49  
50  
51  
52  
53  
54  
55  
56  
57  
58  
59  
60**Results**

|                  |     |                                                                                                                                                                                                              |                   |
|------------------|-----|--------------------------------------------------------------------------------------------------------------------------------------------------------------------------------------------------------------|-------------------|
| Participants     | 13* | (a) Report numbers of individuals at each stage of study—eg numbers potentially eligible, examined for eligibility, confirmed eligible, included in the study, completing follow-up, and analysed            | 8                 |
|                  |     | (b) Give reasons for non-participation at each stage                                                                                                                                                         | 8                 |
|                  |     | (c) Consider use of a flow diagram                                                                                                                                                                           | Figure S1         |
| Descriptive data | 14* | (a) Give characteristics of study participants (eg demographic, clinical, social) and information on exposures and potential confounders                                                                     | Table 1, Table S1 |
|                  |     | (b) Indicate number of participants with missing data for each variable of interest                                                                                                                          | Table 1           |
|                  |     | (c) <i>Cohort study</i> —Summarise follow-up time (eg, average and total amount)                                                                                                                             |                   |
| Outcome data     | 15* | <i>Cohort study</i> —Report numbers of outcome events or summary measures over time                                                                                                                          |                   |
|                  |     | <i>Case-control study</i> —Report numbers in each exposure category, or summary measures of exposure                                                                                                         |                   |
|                  |     | <i>Cross-sectional study</i> —Report numbers of outcome events or summary measures                                                                                                                           | Table 1           |
| Main results     | 16  | (a) Give unadjusted estimates and, if applicable, confounder-adjusted estimates and their precision (eg, 95% confidence interval). Make clear which confounders were adjusted for and why they were included | Table 2, Table S3 |
|                  |     | (b) Report category boundaries when continuous variables were categorized                                                                                                                                    | All tables        |
|                  |     | (c) If relevant, consider translating estimates of relative risk into absolute risk for a meaningful time period                                                                                             | na                |
| Other analyses   | 17  | Report other analyses done—eg analyses of subgroups and interactions, and sensitivity analyses                                                                                                               | Table S2, S3      |

**Discussion**

|                  |    |                                                                                                                                                                            |    |
|------------------|----|----------------------------------------------------------------------------------------------------------------------------------------------------------------------------|----|
| Key results      | 18 | Summarise key results with reference to study objectives                                                                                                                   | 11 |
| Limitations      | 19 | Discuss limitations of the study, taking into account sources of potential bias or imprecision. Discuss both direction and magnitude of any potential bias                 | 12 |
| Interpretation   | 20 | Give a cautious overall interpretation of results considering objectives, limitations, multiplicity of analyses, results from similar studies, and other relevant evidence | 12 |
| Generalisability | 21 | Discuss the generalisability (external validity) of the study results                                                                                                      | 12 |

**Other information**

|         |    |                                                                                                                                                               |    |
|---------|----|---------------------------------------------------------------------------------------------------------------------------------------------------------------|----|
| Funding | 22 | Give the source of funding and the role of the funders for the present study and, if applicable, for the original study on which the present article is based | 29 |
|---------|----|---------------------------------------------------------------------------------------------------------------------------------------------------------------|----|

\*Give information separately for cases and controls in case-control studies and, if applicable, for exposed and unexposed groups in cohort and cross-sectional studies.

**Note:** An Explanation and Elaboration article discusses each checklist item and gives methodological background and published examples of transparent reporting. The STROBE checklist is best used in conjunction with this article (freely available on the Web sites of PLoS Medicine at <http://www.plosmedicine.org/>, Annals of Internal Medicine at

1  
2 <http://www.annals.org/>, and *Epidemiology* at <http://www.epidem.com/>). Information on the STROBE Initiative is  
3 available at [www.strobe-statement.org](http://www.strobe-statement.org).  
4  
5  
6  
7  
8  
9  
10  
11  
12  
13  
14  
15  
16  
17  
18  
19  
20  
21  
22  
23  
24  
25  
26  
27  
28  
29  
30  
31  
32  
33  
34  
35  
36  
37  
38  
39  
40  
41  
42  
43  
44  
45  
46  
47  
48  
49  
50  
51  
52  
53  
54  
55  
56  
57  
58  
59  
60

For peer review only

# BMJ Open

## Spatial epidemiology of gestational age and birth weight in Switzerland: Census-based linkage study

|                                 |                                                                                                                                                                                                                                                                                                                                                                                                                                                                                    |
|---------------------------------|------------------------------------------------------------------------------------------------------------------------------------------------------------------------------------------------------------------------------------------------------------------------------------------------------------------------------------------------------------------------------------------------------------------------------------------------------------------------------------|
| Journal:                        | <i>BMJ Open</i>                                                                                                                                                                                                                                                                                                                                                                                                                                                                    |
| Manuscript ID                   | bmjopen-2018-027834.R2                                                                                                                                                                                                                                                                                                                                                                                                                                                             |
| Article Type:                   | Original research                                                                                                                                                                                                                                                                                                                                                                                                                                                                  |
| Date Submitted by the Author:   | 09-Oct-2019                                                                                                                                                                                                                                                                                                                                                                                                                                                                        |
| Complete List of Authors:       | Skrivankova, Veronika; Universitat Bern Institut fur Sozial- und Praventivmedizin, Zwahlen , Marcel; Universitat Bern Institut fur Sozial- und Praventivmedizin<br>Adams, Mark; University of Zurich, Department of Neonatology<br>Low, Nicola; University of Bern, Institute of Social and Preventive Medicine<br>Kuehni, Claudia; Universitat Bern Institut fur Sozial- und Praventivmedizin<br>Egger, Matthias; University of Bern, Institute of Social and Preventive Medicine |
| <b>Primary Subject Heading</b>: | Public health                                                                                                                                                                                                                                                                                                                                                                                                                                                                      |
| Secondary Subject Heading:      | Reproductive medicine, Obstetrics and gynaecology                                                                                                                                                                                                                                                                                                                                                                                                                                  |
| Keywords:                       | birth weight, gestational age, spatial epidemiology, Switzerland, socio-economic position, education                                                                                                                                                                                                                                                                                                                                                                               |
|                                 |                                                                                                                                                                                                                                                                                                                                                                                                                                                                                    |

SCHOLARONE™  
Manuscripts

1  
2  
3  
4  
5  
6  
7 **Spatial epidemiology of gestational age and birth weight in Switzerland:**  
8  
9 **Census-based linkage study**  
10  
11  
12  
13

14 Veronika Skrivankova<sup>1</sup>, Marcel Zwahlen<sup>1</sup>, Mark Adams<sup>2</sup>, Nicola Low<sup>1</sup>,  
15  
16 Claudia E Kuehni<sup>1,3</sup>, Matthias Egger<sup>1</sup>  
17  
18  
19  
20  
21  
22

23 1) Institute of Social and Preventive Medicine (ISPM), University of Bern, Bern, Switzerland

24 2) Department of Neonatology, University Hospital Zurich, University of Zurich, Zurich,  
25  
26 Switzerland  
27

28 3) Pediatric Respiratory Medicine, Inselspital, Bern University Hospital, University of Bern,  
29  
30 Switzerland  
31  
32  
33  
34  
35  
36  
37  
38  
39  
40  
41  
42  
43  
44  
45  
46  
47  
48  
49  
50

37 Correspondence to:

41 Professor Matthias Egger MD

42 Institute of Social and Preventive Medicine (ISPM), University of Bern

43 Mittelstrasse 43, CH-3012 Bern, Switzerland

44 matthias.egger@ispm.unibe.ch  
45  
46  
47  
48  
49  
50

51 **Word counts:** Abstract 285 words, strengths and limitations of the study 91 words, main text  
52 3484 words, 43 references, 3 tables, 2 figures, supplementary materials with 4 tables and 3  
53 figures.  
54  
55  
56  
57  
58  
59  
60

## ABSTRACT

**Background:** Gestational age and birth weight are strong predictors of infant morbidity and mortality. Understanding spatial variation can inform policies to reduce health inequalities. We examined small-area variation in gestational age and birth weight in Switzerland.

**Methods:** All singleton live births recorded in the Swiss Live Birth Register 2011 to 2014 were eligible. We deterministically linked the Live Birth Register with census and survey data to create datasets including neonatal and pregnancy-related variables, parental characteristics and geographical variables. We produced maps of 705 areas and fitted linear mixed-effect models to assess to what extent spatial variation was explained by these variables.

**Results:** We analysed all 315,177 eligible live births. Area-level averages of gestational age varied between 272-279 days, and between 3138-3467g for birth weight. The fully adjusted models explained 31% and 87% of spatial variation of gestational age and birth weight, respectively. Language region accounted for most of the explained variation (23% in gestational age and 62% in birthweight), with shorter gestational age (-0.6 days and -0.9 days) and lower birth weight (-1.1% and -1.8%) in French- and Italian-speaking areas, respectively, compared to German-speaking areas. Other variables explaining variation were, for gestational age, the level of urbanization (10%) and parental nationality (3%). For birth weight, they were gestational age (27%), parental nationality (27%), civil status (10%) and altitude (10%). In a random sample of 81,968 live births with data on parental education, levels of education were only weakly associated with gestational age (-0.9 days for compulsory vs. tertiary maternal education) or birth weight (-0.7% for compulsory vs. tertiary maternal education).

**Conclusions:** In Switzerland, small area variation in birth weight is largely explained, and variation in gestational age partially explained, by geocultural, socio-demographic and pregnancy factors.



### Strengths and limitations of this study

- This study was based on a large sample with national coverage and routinely collected data on neonatal and pregnancy-related predictors of gestational age and birth weight.
- Precise location data allowed for detailed geographical maps of spatial distribution and assessment of spatial variation in the two birth outcomes.
- No data were available on the mode of delivery, health-related behaviours such as maternal smoking, or gestational diabetes.
- Parental nationality served as crude proxy for parental height and weight, and language region as a proxy for a range of cultural, social and behavioural factors.

## INTRODUCTION

Gestational age and birth weight are important indicators of prenatal development and predictors of infant morbidity, mortality and long-term health [1–4]. An understanding of geographic differences and their determinants can help to develop policies that reduce health inequalities across population groups and regions [1–4]. Many genetic, physiological, pregnancy-related, socio-economic, lifestyle and environmental factors have been reported to influence gestational age and birth weight [5–8]. Some of these factors tend to cluster in space and regional differences in health outcomes may hence be partially explained by the spatial distribution of their predictors. Importantly, both individual-level factors and the social and environmental characteristics of communities and neighbourhoods may contribute to regional differences [9,10].

Variation across small areas in pregnancy outcomes have not been studied widely. In Scotland, small area crime rates were associated with lower birth weight and with the risk of both small for gestational age babies and preterm birth [11]. A study at county level in Georgia and South Carolina in the United States showed that the proportion of African Americans was associated with low birth weight, whereas higher income was associated with higher birth weight [12]. Similarly, neighbourhood racial composition contributed to variation in low birth weight in New York State [13]. Other small-area analyses have examined associations between birth outcomes and air pollution [14,15]. To our knowledge, few small-area analyses have considered gestational age.

In Switzerland, studies of pregnancy outcomes have focused on specific groups such as migrants or HIV-infected women [16,17], but have not examined geographic variations. The Federal Office of Statistics publishes routine statistics from the Live Birth Register, which does not include geographic information [18]. The objectives of this study were to conduct a nationwide analysis of spatial variation in gestational age and birth weight, and to assess how much small-area variation was explained by available data about neonatal and pregnancy-related variables, parental characteristics and geographical variables.

## METHODS

### Data sources

We used deterministic methods to link three data sources using encrypted national identification numbers: the Live Birth Register, the Swiss National Cohort and the Structural Surveys. Registration of live births is compulsory by law in Switzerland coverage is near 100%. The Swiss National Cohort (SNC) is a long-term, national study of mortality in Switzerland [19,20], linking census and mortality records. The 1990 and 2000 censuses were the last house-to-house censuses with coverage of the entire Swiss population. From 2010 onwards, the national census was replaced by a national population register and annual postal survey of the resident population, known as Structural Surveys [21]. Each structural Survey includes a random sample of around 300,000 people aged 15 years or older; for example, in 2010, it included 317,221 persons [21]. The reference is the entire Swiss resident population and the reference day 31 December.

### Variables and definitions

We defined three sets of variables. The first set, neonatal and pregnancy-related variables come from the Live Birth Register; date of birth, birth weight, gestational age, sex and birth rank. Birth weight is measured after initial mother-child bonding, usually by the midwife using a calibrated hospital scale. Gestational age is based on the last menstrual period, with or without additional information from ultrasound scans. Birth rank was determined from the list of all live births by the same mother recorded in the Live Birth Register, and is hence restricted to the births that occurred in Switzerland. It was classified as 1, 2, 3 and  $\geq 4$  live births, including the current birth. The second set includes parental variables. The Structural Surveys provide information about the highest level of completed maternal and paternal education, classified as 'tertiary', 'secondary', or 'compulsory or less'. The Swiss National Cohort provides data about parental nationality categorised as 'Swiss', 'Southern Europe', 'Western Europe', 'Northern Europe', 'Eastern Europe', 'Other' (non-European), or missing (supplementary [Table S1](#) gives the full list of countries). The third set, geographical variables comes from the Swiss National Cohort. Each live birth was assigned an altitude and one of 705 statistical areas [22], based on the geocode of place of residence of the mother at the time of birth. Language regions are 'German', 'French' and 'Italian', and the level of urbanisation was defined using standard definitions of 'urban', 'peri-urban' and 'rural'.

### Study populations and outcomes

All singleton live births recorded in the Live Birth Register from 1 January 2011 to 31 December 2014 were eligible. Gestational age at birth and birth weight were the outcomes of interest. For each outcome, two datasets were analysed: the first, larger dataset consisted of all eligible births with complete data on gestational age, birth weight and nationality of the mother. The second was the complete case population containing eligible live births with available data on all variables, including parental education. The second dataset hence included only newborns whose parents were included in the random sample of one of the Structural Surveys 2010-2014. We also excluded mothers who delivered at age less than 20 years, because education is incomplete at that age.

### Statistical and spatial analyses

We fitted linear mixed-effect models (LMEM) to examine the associations between the two outcomes and the neonatal and pregnancy, parental and environmental factors. In the model for birth weight, we log-transformed the outcome and used a cubic spline function with three knots at weeks 25, 30 and 35 to capture the relationship between gestational age and log birth weight. Log transforming the birth weight results in a multiplicative model. Except for gestational age, maternal age and altitude, all predictors were modelled categorically. Maternal age was modelled by a piece-wise linear function, with age group 20 to 30 years as the reference group and separate linear trends for age groups 30-40 years, over 40 years and less than 20 years. Altitude was centred at 500 m and modelled linearly. The random effects in the mixed-effect model captured area-level differences between observed and expected mean outcome, based on the 705 statistical areas [22]. In the main analysis, we fitted four models to the complete-case dataset: Model 0 contained no explanatory variables. Model 1 included birth and pregnancy-related variables: sex, birth rank and gestational age (for the analysis of birth weight). Model 2 additionally included age of the mother, parental education and nationality. Model 3 additionally included geographical variables: altitude, degree of urbanisation and language region.

We displayed mean gestational age and birth weight at area-level on maps and assessed to what extent spatial variation was accounted for by the explanatory variables. Values were categorised into seven intervals symmetric around the mean and color-coded. Spatial autocorrelation of the gestational age and birth weight across regions was tested by global and local Moran's I tests [23]. The global Moran test summarises overall spatial

1  
2  
3 autocorrelation and the local test identifies areas that are correlated with neighbouring  
4 areas. In the presence of spatial autocorrelation, model estimates are at risk of bias if the  
5 autocorrelation is not taken into account.  
6  
7

8  
9 We performed three sensitivity analyses. First, we accounted for spatial  
10 autocorrelation using the Besag-York-Mollier (BYM) model [24] using uninformative gamma-  
11 distributed (1, 0.005) priors. The calculations were carried out using the Integrated Nested  
12 Laplace Approximation (INLA) approach [25]. Similar results from models with and without  
13 the spatial component indicate low bias. Second, we repeated analyses of birth weight  
14 without adjusting for gestational age. Third, we repeated analyses of birth weight and  
15 gestational age, additionally adjusting for neighbourhood socio-economic position (SEP),  
16 using an updated version of the Swiss SEP index, which is based on levels of rent, education  
17 and occupation of heads of households and crowding [26]. The updated version of the index  
18 is based on data from Structural Surveys 2010-2014, and includes information on income of  
19 households in the neighbourhood. We used quintiles of the index in the analysis, with higher  
20 quintiles indicating higher SEP.  
21  
22  
23  
24  
25  
26  
27  
28  
29  
30

31 All analyses and maps were done in R 3.3.2 [27] using packages lme4, maptools, sp,  
32 spdep, rgdal, INLA, GISTools, rgeos, raster and ggplot2.  
33  
34  
35

### 36 **Patient and public involvement**

37  
38 This analysis was based on routine registry data and no patients were involved in developing  
39 the research question, outcome measures and overall design of the study. Due to the  
40 anonymous nature of the data, we were unable to disseminate the results of the research  
41 directly to study participants.  
42  
43  
44  
45  
46  
47  
48  
49  
50  
51  
52  
53  
54  
55  
56  
57  
58  
59  
60

## RESULTS

### Characteristics of study populations

A total of 328,349 live births were recorded in Switzerland between 1 January 2011 and 31 December 2014. We excluded non-singleton live births (n=11,835) and those with missing gestational age, birth weight or maternal nationality. The eligible study population therefore included 315,177 singleton live births. The complete case population consisted of 81,968 singleton live births with values available for all predictors including parental education, for which complete data were only available in the Structural Surveys (supplementary [Figure S1](#)).

[Table 1](#) shows the distributions of predictors and outcomes in the two study populations. Data about the nationality of fathers was missing for 1.5% of eligible live births. In almost all of these cases, information about the father was missing completely, indicating that the father is unknown to the authorities. Apart from missing data, the distributions of most variables were similar between the two nested datasets. The proportion of Swiss mothers and fathers was higher in the complete case population than in the eligible population. Birth at full term is defined as between 39 and 41 weeks of gestation (273 to 287 days). The mean gestational age in the eligible population was 276 days (SD 12) and the mean birth weight 3328 g (SD 515). The corresponding figures in the complete case population were 276 days (SD 12) and 3339 g (SD 501).

### Maps of gestational age and birth weight

[Figure 1](#) presents maps of Switzerland with crude average gestational age and birth weight across the 705 areas. For both outcomes, the maps are broadly similar between the eligible and complete case populations. For gestational age, area-level averages for the eligible population vary between 272 and 279 days. For the complete case population variation was greater, from 268 to 281 days, as expected for a smaller sample. The map shows shorter gestation in the Western, North Western region and Southern (Canton of Ticino) regions of Switzerland, with a patchy pattern in the densely populated areas between the Alps (across the centre) and Jura mountain ranges (to the North West). For birth weight, area-level averages vary between 3138 and 3467g for the eligible population and between 3080 and 3648 g for the complete case population. The maps for birth weight show lower birth weights in the Western and Southern regions of the country. The French and Italian-speaking

1  
2  
3 regions are in the West and South of Switzerland, with the remainder being German-  
4 speaking.  
5

### 6 7 **Multivariable analyses** 8

9  
10 Table 2 shows associations of area-level mean gestational age at birth and mean birth  
11 weight with pregnancy, parental and environmental factors from the fully adjusted linear  
12 mixed-effects models (model 3). For gestational age, the largest differences were observed  
13 across maternal age at birth. Compared to maternal age 20-30 years, gestational age was  
14 considerably shorter in teenage mothers, and in mothers aged over 40 years. For example, in  
15 mothers aged 15 years, pregnancies were about 4 days shorter, and after age of 40 years,  
16 they were about 3 days shorter for each 5-year increase in maternal age. Compared with  
17 Swiss fathers, pregnancies were about 4 days shorter if the nationality of the father was  
18 missing. Smaller differences in gestational age were observed across categories of sex, birth  
19 rank, nationality of the mother, urbanisation and between language regions (Table 2). In the  
20 complete case population, lower levels of education were associated with shorter  
21 pregnancies. Gestational age at birth was not associated with altitude.  
22  
23  
24  
25  
26  
27  
28  
29  
30  
31

32  
33  
34  
35  
36  
37  
38  
39  
40  
41  
42  
43  
44  
45  
46  
47  
48  
49  
50  
51  
52  
53  
54  
55  
56  
57  
58  
59  
60  
Supplementary Figure S2 shows the relationship between gestational age and birth  
weight separately for male and female newborns. Male newborns were about 5% heavier  
than female newborns and birth weight increased with birth order (Table 2). In contrast to  
gestational age, mother's age was not associated with birth weight. Babies born to mothers  
or fathers from Northern or Eastern Europe were slightly heavier than babies born to Swiss  
mothers; birth weights were lowest for babies of fathers with missing nationality. Birth  
weight slightly decreased with increasing parental educational attainment. Babies born in  
the French and Italian-speaking regions were lighter than babies born in the German-  
speaking Switzerland. Finally, birth weight decreased with increasing altitude of residence.

### 51 52 **Proportion of spatial variation explained** 53

54  
55  
56  
57  
58  
59  
60  
The fully adjusted model (model 3) for gestational age explained 31% and 39% of the spatial  
variation across the 705 areas for eligible and complete case populations, respectively. The  
corresponding figures for birth weight were 87% and 88%. When assessing each factor  
separately (Table 3), language region alone explained most of the spatial variation for both  
outcomes. For gestational age, level of urbanisation of the mother's place of residence also  
explained a considerable part of the variation. Factors that contributed to explaining the

1  
2  
3 spatial variation in birth weight were gestational age, parental nationalities, altitude at the  
4 mother's place of residence and birth order. [Figure 2](#) illustrates the reduction in the spatial  
5 variation of gestational age and birth weight with maps, when moving from model 0 (0%  
6 reduction) to models 1, 2 and 3, based on the complete case population.  
7  
8  
9

### 10 **Spatial autocorrelation and sensitivity analyses**

11  
12 For gestational age, the global Moran's I statistic, based on the complete case dataset and  
13 model 0, was  $I=0.19$ , with  $P<10^{-14}$ . After adjusting for all the predictors in model 3 there was  
14 still some residual autocorrelation ( $I=0.10$ ,  $P=0.0004$ ). For birth weight, the corresponding  
15 Moran's I statistic was  $I=0.28$ , with  $P<10^{-15}$ . After adjusting for all predictors in model 3 there  
16 was little residual autocorrelation ( $I=0.04$ ,  $P=0.051$ ). Supplementary Table S2 compares the  
17 results from model 3 accounting and not accounting for spatial autocorrelation. The results  
18 are similar and the potential bias from residual spatial autocorrelation is therefore unlikely  
19 to be a major issue. Repeating analyses of birth weight without adjusting for gestational age  
20 produced generally similar coefficients (supplementary Table S3). Associations with maternal  
21 age, maternal education and language regions were slightly stronger in model 3 without  
22 adjustment for gestational age, possibly because some of their effect was mediated by  
23 gestational age. Model 3 without gestational age explained 77% and 76% of the spatial  
24 variation in the eligible and complete case population, respectively. The index of  
25 neighbourhood SEP was only weakly associated with the two outcomes (Supplementary  
26 Table S4), and adjusting for it only slightly increased the amount of spatial variation  
27 explained.  
28  
29  
30  
31  
32  
33  
34  
35  
36  
37  
38  
39  
40  
41  
42  
43  
44  
45  
46  
47  
48  
49  
50  
51  
52  
53  
54  
55  
56  
57  
58  
59  
60



## DISCUSSION

Our study assessed factors associated with gestational age and birth weight in Switzerland and their contribution to spatial variation, based on routinely collected data. Gestational age at birth was strongly associated with maternal age, missing information on the father and language region. Birth weight was associated with sex, birth rank, missing information on the father, parental education, altitude and language region. The variables included in the fully adjusted model explained more than 80% of the regional variation in birth weight and about 30% of the regional variation in gestational age. Strengths of this study include a large sample with national coverage of the Swiss resident population, as well as the availability of data on several relevant predictors, either on all births or on a large random sample of eligible births. Precise spatial data and spatial statistics allowed us to assess the proportion of area-level variation explained, spatial autocorrelation and gauge the likelihood of bias due to residual autocorrelation.

This study found important spatial variation in both gestational age and birth weight in Switzerland. Language region in Switzerland was the single factor that explained the greatest proportion of spatial variation in gestational age and birth weight. In the French and Italian speaking regions, gestational age was shorter and birth weight lower than in the German speaking part. Language region is a proxy for a wide range of cultural, social and behavioural factors, including diet, smoking and alcohol consumption [28] of parents, as well as their ancestry. In this context it is noteworthy that neighbourhood SEP explained only a small proportion of the spatial variation.

Other factors that could not be measured directly, such as health care provision, might have accounted for some of the unexplained variation. In particular, data at the individual or small area level on the mode of delivery (vaginal or by Caesarean section, induced or spontaneous) were not available. The proportion of live births with Caesarian section as the mode of delivery varies across regions in Switzerland, and it is reasonable to expect that it would explain some of the remaining variation, both in gestational age and birth weight. Specifically, we would expect regions with higher proportions of Caesarian section to have lower mean gestational age (and consequently birthweight). However, the regional rates of Caesarian section published by the Federal Office of Statistics do not match this expectation [29], with urban areas showing some of the highest Caesarian section rates

1  
2  
3 but also high mean gestational age and birth weight. In fact, geographical patterns of  
4 Caesarean section seem to be largely driven by urban-rural differences. Differences in  
5 section rates may have contributed to spatial variation in gestational age, but it seems  
6 unlikely that they are an important driver of this variation.  
7  
8  
9

10  
11 While young and old maternal age are well-known predictors of shorter gestation  
12 [30,31], the association we found with missing data on the father's nationality was  
13 unexpected. In the vast majority of cases, the information is missing because no father came  
14 forward and officially accepted paternity of the child. It is possible that missing data about  
15 the father are an indicator of lower socio-economic position and social support of the  
16 mother, resulting in greater vulnerability. Studies from the United States of America found a  
17 missing name of the father on the infant's birth certificate was associated with lower  
18 education, smoking during pregnancy, preterm birth, lower birth weight, no breastfeeding  
19 and higher neonatal and post-neonatal mortality [32–35]. Children not recognised by their  
20 fathers may thus be a group at higher risk of infant and child morbidity and mothers might  
21 benefit from additional care during pregnancy and postnatally.  
22  
23  
24  
25  
26  
27  
28  
29  
30

31  
32 There are several limitations to our study. We did not have data about maternal  
33 health-related behaviours such as smoking [36], mothers' weight and height [36], disease  
34 such as gestational diabetes and data on parental genetic factors. Whilst parental nationality  
35 and education might have served as crude proxies for some missing variables, individual-  
36 level data about these factors would be valuable. A recent large-scale meta-analysis of  
37 genome-wide association data indicated that genetic factors influence birth weight through  
38 their effects on gestational age, maternal glucose metabolism, cytochrome P450 activity and  
39 possibly through effects on maternal immune function and blood pressure [37]. Of note,  
40 compared to the foetus who carries maternal and paternal genes, maternal genes exert a  
41 larger effect on gestational age and a weaker effect on birth weight [38,39].  
42  
43  
44  
45  
46  
47  
48  
49

50  
51 Our study also showed associations between mean gestational age and the  
52 proportion of preterm births (<37 weeks), as well as mean birth weight and proportion of  
53 low birth weight newborns (<2500 g) across the 705 small areas, i.e. associations with  
54 conditions that are clinically relevant (Figure S3). However, from a statistical point of view,  
55 analyzing means is more robust and powerful than using a binary indicator defined by a  
56 cutoff [40]. Finally, we adjusted analyses of birth weight for gestational age, which may  
57  
58  
59  
60

1  
2  
3 mediate the effects of other variables, for example maternal age. Adjusting for a variable on  
4 the causal pathway has been criticised because it may introduce selection bias (or collider  
5 bias in the language of directed acyclic graphs), if there are unknown or unmeasured factors  
6 that have an effect on both gestational age and birth weight [41–43]. In our study results  
7 were broadly similar with and without adjustment for gestational age and the focus of our  
8 study was not on causal inference, but on gaining an understanding of the factors  
9 contributing to spatial variation of birth weight and gestational age.  
10  
11  
12  
13  
14  
15

16 In conclusion, our study identified important differences in mean gestational age and  
17 birth weight across Switzerland. Small area variation in birth weight is largely, and in  
18 gestational age partially, explained by pregnancy-related, parental, and environmental  
19 factors.  
20  
21  
22  
23  
24  
25  
26  
27  
28  
29  
30  
31  
32  
33  
34  
35  
36  
37  
38  
39  
40  
41  
42  
43  
44  
45  
46  
47  
48  
49  
50  
51  
52  
53  
54  
55  
56  
57  
58  
59  
60

## REFERENCES

- 1 Regev RH, Lusky A, Dolfin T, *et al.* Excess mortality and morbidity among small-for-gestational-age premature infants: a population-based study. *J Pediatr* 2003;**143**:186–91.
- 2 Wilcox AJ. Birth weight and perinatal mortality: the effect of maternal smoking. *Am J Epidemiol* 1993;**137**:1098–104.
- 3 Barker DJ, Winter PD, Osmond C, *et al.* Weight in infancy and death from ischaemic heart disease. *Lancet* 1989;**ii**:577–80.<http://www.ncbi.nlm.nih.gov/pubmed/2570282> (accessed 3 Feb 2015).
- 4 Lubchenco LO, Searls DT, Brazie J V. Neonatal mortality rate: relationship to birth weight and gestational age. *J Pediatr* 1972;**81**:814–22.
- 5 de Bernabé J V., Soriano T, Albaladejo R, *et al.* Risk factors for low birth weight: a review. *Eur J Obstet Gynecol Reprod Biol* 2004;**116**:3–15.
- 6 Kramer MS. Determinants of low birth weight: methodological assessment and meta-analysis. *Bull World Health Organ* 1987;**65**:663–737.
- 7 Secker-Walker RH, Vacek PM. Relationships between cigarette smoking during pregnancy, gestational age, maternal weight gain, and infant birthweight. *Addict Behav* 2003;**28**:55–66. doi:10.1016/S0306-4603(01)00216-7
- 8 Matoba N, Yu Y, Mestan K, *et al.* Differential Patterns of 27 Cord Blood Immune Biomarkers Across Gestational Age. *Pediatrics* 2009;**123**:1320–8. doi:10.1542/peds.2008-1222
- 9 Diez Roux A V, Mair C. Neighborhoods and health. *Ann N Y Acad Sci* 2010;**1186**:125–45. doi:10.1111/j.1749-6632.2009.05333.x
- 10 Macintyre S, Ellaway A, Cummins S. Place effects on health: how can we conceptualise, operationalise and measure them? *Soc Sci Med* 2002;**55**:125–39.<http://www.ncbi.nlm.nih.gov/pubmed/12137182>
- 11 Clemens T, Dibben C. Living in stressful neighbourhoods during pregnancy: An observational study of crime rates and birth outcomes. *Eur J Public Health* 2017;**27**:197–202. doi:10.1093/eurpub/ckw131
- 12 Kirby RS, Liu J, Lawson AB, *et al.* Spatio-temporal patterning of small area low birth weight incidence and its correlates: A latent spatial structure approach. *Spat Spatiotemporal Epidemiol* 2011;**2**:265–71. doi:10.1016/j.sste.2011.07.011

- 1  
2  
3 13 Insaf TZ, Talbot T. Identifying areas at risk of low birth weight using spatial  
4 epidemiology: A small area surveillance study. *Prev Med (Baltim)* 2016;**88**:108–14.  
5 doi:10.1016/j.ypmed.2016.03.019  
6  
7  
8 14 Dibben C, Clemens T. Place of work and residential exposure to ambient air pollution  
9 and birth outcomes in Scotland, using geographically fine pollution climate mapping  
10 estimates. *Environ Res* 2015;**140**:535–41. doi:10.1016/j.envres.2015.05.010  
11  
12  
13 15 Ghosh JKC, Wilhelm M, Su J, *et al.* Assessing the Influence of Traffic-related Air  
14 Pollution on Risk of Term Low Birth Weight on the Basis of Land-Use-based Regression  
15 Models and Measures of Air Toxics. *Am J Epidemiol* 2012;**175**:1262–74.  
16 doi:10.1093/aje/kwr469  
17  
18  
19 16 Aebi-Popp K, Lapaire O, Glass TR, *et al.* Pregnancy and delivery outcomes of HIV  
20 infected women in Switzerland 2003-2008. *J Perinat Med* 2010;**38**:353–8.  
21 doi:10.1515/JPM.2010.052  
22  
23  
24 17 Jaeger FN, Hossain M, Kiss L, *et al.* The health of migrant children in Switzerland. *Int J*  
25 *Public Health* 2012;**57**:659–71. doi:10.1007/s00038-012-0375-8  
26  
27  
28 18 Federal Statistical Office. Births.  
29 [https://www.bfs.admin.ch/bfs/de/home/statistiken/bevoelkerung/geburten-](https://www.bfs.admin.ch/bfs/de/home/statistiken/bevoelkerung/geburten-todesfaelle/geburten.html)  
30 [todesfaelle/geburten.html](https://www.bfs.admin.ch/bfs/de/home/statistiken/bevoelkerung/geburten-todesfaelle/geburten.html) (accessed 18 Sep 2018).  
31  
32  
33 19 Spörri A, Zwahlen M, Egger M, *et al.* The Swiss National Cohort: a unique database for  
34 national and international researchers. *Int J Public Heal* 2010;**55**:239–42.  
35 doi:10.1007/s00038-010-0160-5  
36  
37  
38 20 Bopp M, Spörri A, Zwahlen M, *et al.* Cohort Profile: the Swiss National Cohort--a  
39 longitudinal study of 6.8 million people. *Int J Epidemiol* 2009;**38**:379–84.  
40 doi:10.1093/ije/dyn042  
41  
42  
43 21 Federal Statistical Office. Structural Survey.  
44 <https://www.bfs.admin.ch/bfs/en/home/statistics/population/surveys/se.html>  
45 (accessed 18 Sep 2018).  
46  
47  
48 22 Federal Statistical Office. Swiss MedStat regions.  
49 [https://www.bfs.admin.ch/bfs/de/home/statistiken/gesundheit/nomenklaturen/med](https://www.bfs.admin.ch/bfs/de/home/statistiken/gesundheit/nomenklaturen/med-sreg.html)  
50 [sreg.html](https://www.bfs.admin.ch/bfs/de/home/statistiken/gesundheit/nomenklaturen/med-sreg.html) (accessed 18 Sep 2018).  
51  
52  
53 23 Moran PAP. Notes on Continuous Stochastic Phenomena. *Biometrika* 1950;**37**:17–  
54 23.<http://www.jstor.org/stable/2332142>  
55  
56  
57  
58  
59  
60

- 1  
2  
3 24 Besag J, York J, Mollié A. Bayesian image restoration, with two applications in spatial  
4 statistics. *Ann Inst Stat Math* 1991;:1–20.  
5  
6  
7 25 Rue H, Martino S, Chopin N. Approximate Bayesian inference for latent Gaussian  
8 models by using integrated nested Laplace approximations. *J R Stat Soc Ser B*  
9 2009;**71**:319–92.  
10  
11  
12 26 Panczak R, Galobardes B, Voorpostel M, *et al*. A Swiss neighbourhood index of  
13 socioeconomic position: development and association with mortality. *J Epidemiol*  
14 *Community Health* 2012;**66**:1129–36. doi:10.1136/jech-2011-200699  
15  
16  
17 27 The R Core Team: R. A Language and Environment for Statistical Computing. Vienna,  
18 Austria. 2014;ISBN 3-900.http://www.r-project.org.  
19  
20  
21 28 Faeh D, Minder C, Gutzwiller F, *et al*. Culture, risk factors and mortality: can  
22 Switzerland add missing pieces to the European puzzle? *J Epidemiol Community Heal*  
23 2009;**63**:639–645.  
24  
25  
26  
27 29 Federal Office of Statistics. Rate of Caesarian section (MS regions).  
28 [https://www.bfs.admin.ch/bfs/en/home/statistics/catalogues-](https://www.bfs.admin.ch/bfs/en/home/statistics/catalogues-databases/maps.assetdetail.4262550.html)  
29 [databases/maps.assetdetail.4262550.html](https://www.bfs.admin.ch/bfs/en/home/statistics/catalogues-databases/maps.assetdetail.4262550.html)  
30  
31  
32 30 Kozuki N, Lee AC, Silveira MF, *et al*. The associations of parity and maternal age with  
33 small-for-gestational-age, preterm, and neonatal and infant mortality: A meta-  
34 analysis. *BMC Public Health*. 2013;**13**:S2. doi:10.1186/1471-2458-13-S3-S2  
35  
36  
37  
38 31 Restrepo-Méndez MC, Lawlor DA, Horta BL, *et al*. The association of maternal age  
39 with birthweight and gestational age: A cross-cohort comparison. *Paediatr Perinat*  
40 *Epidemiol* 2015;**29**:31–40. doi:10.1111/ppe.12162  
41  
42  
43 32 Alio AP, Mbah AK, Kornosky JL, *et al*. Assessing the impact of paternal involvement on  
44 racial/ethnic disparities in infant mortality rates. *J Community Health* 2011;**36**:63–8.  
45 doi:10.1007/s10900-010-9280-3  
46  
47  
48  
49 33 Gaudino JA, Jenkins B, Rochat RW. No fathers' names: A risk factor for infant mortality  
50 in the State of Georgia, Usa. *Soc Sci Med* 1999;**48**:253–65. doi:10.1016/S0277-  
51 9536(98)00342-6  
52  
53  
54 34 Cheng ER, Hawkins SS, Rifas-Shiman SL, *et al*. Association of missing paternal  
55 demographics on infant birth certificates with perinatal risk factors for childhood  
56 obesity. *BMC Public Health* 2016;**16**:1–10. doi:10.1186/s12889-016-3110-1  
57  
58  
59 35 Tan H, Wen SW, Walker M, *et al*. Missing paternal demographics: A novel indicator for  
60

- 1  
2  
3 identifying high risk population of adverse pregnancy outcomes. *BMC Pregnancy*  
4 *Childbirth* 2004;**4**. doi:10.1186/1471-2393-4-21  
5  
6  
7 36 Wen SW, Goldenberg RL, Cutter GR, *et al*. Smoking, maternal age, fetal growth, and  
8 gestational age at delivery. *Am J Obstet Gynecol* 1990;**162**:53–8. doi:10.1016/0002-  
9 9378(90)90819-5  
10  
11  
12 37 Beaumont RN, Warrington NM, Cavadino A, *et al*. Genome-wide association study of  
13 offspring birth weight in 86 577 women identifies five novel loci and highlights  
14 maternal genetic effects that are independent of fetal genetics. *Hum Mol Genet*  
15 2018;**27**:742–56. doi:10.1093/hmg/ddx429  
16  
17  
18 38 Beaty TH. Invited commentary: Two studies of genetic control of birth weight where  
19 large data sets were available. *Am J Epidemiol* 2007;**165**:753–5.  
20  
21 doi:10.1093/aje/kwk106  
22  
23  
24 39 Lunde A, Melve KK, Gjessing HK, *et al*. Genetic and environmental influences on birth  
25 weight, birth length, head circumference, and gestational age by use of population-  
26 based parent-offspring data. *Am J Epidemiol* 2007;**165**:734–41.  
27  
28 doi:10.1093/aje/kwk107  
29  
30  
31 40 Altman DG, Royston P. The cost of dichotomising continuous variables. *BMJ*  
32 2006;**332**:1080.  
33  
34  
35 41 Cole SR, Platt RW, Schisterman EF, *et al*. Illustrating bias due to conditioning on a  
36 collider. *Int J Epidemiol* 2010;**39**:417–20. doi:10.1093/ije/dyp334  
37  
38  
39 42 Delbaere I, Vansteelandt S, De Bacquer D, *et al*. Should we adjust for gestational age  
40 when analysing birth weights? The use of z-scores revisited. *Hum Reprod*  
41 2007;**22**:2080–3. doi:10.1093/humrep/dem151  
42  
43  
44 43 Wilcox AJ, Weinberg CR, Basso O. On the pitfalls of adjusting for gestational age at  
45 birth. *Am J Epidemiol* 2011;**174**:1062–8. doi:10.1093/aje/kwr230  
46  
47  
48  
49  
50  
51  
52  
53  
54  
55  
56  
57  
58  
59  
60



**Table 1. Characteristics of complete case and eligible study populations.**

|                                  | Eligible population |                               |                               | Complete case population |                               |                               |
|----------------------------------|---------------------|-------------------------------|-------------------------------|--------------------------|-------------------------------|-------------------------------|
|                                  | No. (%)             | Gest. age (days)<br>Mean (SD) | Birth weight (g)<br>Mean (SD) | No. (%)                  | Gest. age (days)<br>Mean (SD) | Birth weight (g)<br>Mean (SD) |
| <b>Total</b>                     | 315'177 (100%)      | 276 (12)                      | 3328 (515)                    | 81'968 (100%)            | 276 (12)                      | 3339 (501)                    |
| <b>Birth weight (g)</b>          |                     |                               |                               |                          |                               |                               |
| <1500                            | 2141 (0.7%)         | 196 (27)                      | 966 (354)                     | 445 (0.5%)               | 198 (28)                      | 983 (491)                     |
| 1500-1999                        | 2413 (0.8%)         | 238 (15)                      | 1800 (142)                    | 612 (0.7%)               | 239 (15)                      | 1803 (528)                    |
| 2000-2499                        | 10036 (3.2%)        | 258 (14)                      | 2312 (134)                    | 2484 (3%)                | 258 (13)                      | 2314 (477)                    |
| ≥ 2500                           | 300586 (95.4%)      | 277 (9)                       | 3391 (423)                    | 78426 (95.7%)            | 277 (9)                       | 3396 (502)                    |
| <b>Gestation. age (weeks)</b>    |                     |                               |                               |                          |                               |                               |
| <32 <sup>o</sup>                 | 2333 (0.7%)         | 195 (23)                      | 1108 (527)                    | 487 (0.6%)               | 196 (23)                      | 1134 (491)                    |
| 32 <sup>o</sup> -34 <sup>o</sup> | 3950 (1.3%)         | 237 (6)                       | 2144 (424)                    | 961 (1.2%)               | 237 (6)                       | 2136 (470)                    |
| 35 <sup>o</sup> -36 <sup>o</sup> | 10907 (3.5%)        | 253 (4)                       | 2686 (431)                    | 2760 (3.4%)              | 253 (4)                       | 2692 (489)                    |
| ≥ 37 <sup>o</sup>                | 297987 (94.5%)      | 278 (8)                       | 3385 (440)                    | 77760 (94.9%)            | 278 (8)                       | 3390 (502)                    |
| <b>Sex</b>                       |                     |                               |                               |                          |                               |                               |
| Female                           | 152757 (48.5%)      | 276 (12)                      | 3260 (494)                    | 39823 (48.6%)            | 276 (11)                      | 3267 (502)                    |
| Male                             | 162420 (51.5%)      | 275 (13)                      | 3392 (525)                    | 42145 (51.4%)            | 276 (12)                      | 3406 (501)                    |
| <b>Birth rank</b>                |                     |                               |                               |                          |                               |                               |
| 1                                | 155739 (49.4%)      | 276 (13)                      | 3262 (519)                    | 37763 (46.1%)            | 276 (13)                      | 3267 (498)                    |
| 2                                | 115440 (36.6%)      | 275 (11)                      | 3382 (497)                    | 32315 (39.4%)            | 276 (11)                      | 3386 (504)                    |
| 3                                | 34364 (10.9%)       | 275 (11)                      | 3418 (509)                    | 9360 (11.4%)             | 275 (11)                      | 3430 (508)                    |
| ≥ 4                              | 9634 (3.1%)         | 275 (12)                      | 3438 (537)                    | 2530 (3.1%)              | 275 (11)                      | 3459 (498)                    |
| <b>Civil status</b>              |                     |                               |                               |                          |                               |                               |
| Married                          | 250055 (79.3%)      | 276 (12)                      | 3345 (508)                    | 69465 (84.7%)            | 276 (12)                      | 3349 (501)                    |
| Not married                      | 65122 (20.7%)       | 276 (14)                      | 3262 (536)                    | 12503 (15.3%)            | 276 (13)                      | 3283 (503)                    |
| <b>Maternal age (years)</b>      |                     |                               |                               |                          |                               |                               |
| mean (SD)                        | 31.7 (5.0)          |                               |                               | 32.2 (4.7)               |                               |                               |
| < 20                             | 2679 (0.8%)         | 275 (16)                      | 3224 (554)                    | 0 (0%)                   | -                             | -                             |
| ≥ 20-25                          | 28615 (9.1%)        | 277 (12)                      | 3317 (511)                    | 5417 (6.6%)              | 277 (12)                      | 3337 (491)                    |
| ≥ 25-30                          | 82620 (26.2%)       | 276 (12)                      | 3330 (506)                    | 20771 (25.3%)            | 276 (12)                      | 3337 (500)                    |
| ≥ 30-35                          | 118303 (37.5%)      | 276 (12)                      | 3335 (510)                    | 32771 (40%)              | 276 (12)                      | 3341 (505)                    |
| ≥ 35-40                          | 67914 (21.5%)       | 275 (12)                      | 3333 (523)                    | 19052 (23.2%)            | 275 (11)                      | 3345 (497)                    |
| ≥ 40                             | 15046 (4.8%)        | 273 (14)                      | 3286 (555)                    | 3957 (4.8%)              | 273 (14)                      | 3295 (512)                    |
| <b>Nationality mother</b>        |                     |                               |                               |                          |                               |                               |
| Switzerland                      | 194570 (61.7%)      | 276 (12)                      | 3322 (511)                    | 55591 (67.8%)            | 276 (12)                      | 3331 (502)                    |
| Southern Europe                  | 23585 (7.5%)        | 275 (12)                      | 3251 (494)                    | 5761 (7%)                | 276 (11)                      | 3261 (502)                    |
| Western Europe                   | 26005 (8.3%)        | 276 (12)                      | 3348 (516)                    | 6495 (7.9%)              | 276 (12)                      | 3359 (508)                    |
| Northern Europe                  | 3695 (1.2%)         | 276 (13)                      | 3418 (510)                    | 850 (1%)                 | 276 (13)                      | 3414 (508)                    |
| Eastern Europe                   | 38762 (12.3%)       | 276 (13)                      | 3397 (523)                    | 8035 (9.8%)              | 276 (12)                      | 3422 (499)                    |
| Other                            | 28560 (9.1%)        | 275 (14)                      | 3313 (535)                    | 5236 (6.4%)              | 275 (13)                      | 3332 (492)                    |
| <b>Nationality father</b>        |                     |                               |                               |                          |                               |                               |
| Switzerland                      | 191589 (60.8%)      | 276 (12)                      | 3329 (506)                    | 55432 (67.6%)            | 276 (12)                      | 3336 (502)                    |
| Southern Europe                  | 31466 (10%)         | 275 (12)                      | 3256 (493)                    | 7970 (9.7%)              | 275 (11)                      | 3262 (504)                    |
| Western Europe                   | 26954 (8.6%)        | 276 (12)                      | 3353 (518)                    | 6661 (8.1%)              | 276 (12)                      | 3367 (514)                    |
| Northern Europe                  | 3911 (1.2%)         | 276 (12)                      | 3406 (510)                    | 887 (1.1%)               | 276 (13)                      | 3393 (499)                    |
| Eastern Europe                   | 35387 (11.2%)       | 276 (13)                      | 3397 (528)                    | 7229 (8.8%)              | 276 (12)                      | 3418 (489)                    |
| Other                            | 21077 (6.7%)        | 276 (13)                      | 3307 (531)                    | 3789 (4.6%)              | 276 (12)                      | 3319 (497)                    |
| missing                          | 4793 (1.5%)         | 272 (23)                      | 3148 (693)                    | -                        | -                             | -                             |
| <b>Education mother</b>          |                     |                               |                               |                          |                               |                               |
| Tertiary                         | 42088 (13.4%)       | 276 (12)                      | 3344 (500)                    | 33505 (40.9%)            | 276 (12)                      | 3347 (500)                    |
| Secondary                        | 48878 (15.5%)       | 276 (12)                      | 3328 (509)                    | 38382 (46.8%)            | 276 (12)                      | 3331 (502)                    |
| Compulsory                       | 14642 (4.6%)        | 275 (13)                      | 3329 (534)                    | 10081 (12.3%)            | 275 (13)                      | 3336 (503)                    |
| Unknown (age <20 yrs)            | 2679 (0.8%)         | 275 (16)                      | 3224 (554)                    | 0 (0%)                   | -                             | -                             |
| missing                          | 206890 (65.6%)      | 276 (12)                      | 3326 (517)                    | -                        | -                             | -                             |
| <b>Education father</b>          |                     |                               |                               |                          |                               |                               |
| Tertiary                         | 49848 (15.8%)       | 276 (12)                      | 3348 (497)                    | 40345 (49.2%)            | 276 (12)                      | 3350 (500)                    |
| Secondary                        | 41301 (13.1%)       | 276 (12)                      | 3323 (511)                    | 32118 (39.2%)            | 276 (12)                      | 3327 (504)                    |
| Compulsory                       | 13731 (4.4%)        | 276 (12)                      | 3323 (514)                    | 9505 (11.6%)             | 276 (12)                      | 3330 (500)                    |
| missing                          | 210297 (66.7%)      | 276 (13)                      | 3325 (519)                    | -                        | -                             | -                             |
| <b>Altitude (m)</b>              |                     |                               |                               |                          |                               |                               |
| mean (SD)                        | 515 (189)           |                               |                               | 511 (180)                |                               |                               |
| <b>Urbanisation</b>              |                     |                               |                               |                          |                               |                               |
| Urban                            | 96643 (30.7%)       | 276 (13)                      | 3326 (517)                    | 22770 (27.8%)            | 276 (12)                      | 3334 (502)                    |
| Peri-urban                       | 138826 (44%)        | 275 (12)                      | 3329 (514)                    | 36629 (44.7%)            | 276 (12)                      | 3339 (502)                    |
| Rural                            | 79708 (25.3%)       | 276 (12)                      | 3329 (512)                    | 22569 (27.5%)            | 276 (12)                      | 3343 (500)                    |
| <b>Language region</b>           |                     |                               |                               |                          |                               |                               |
| German                           | 223586 (70.9%)      | 276 (12)                      | 3348 (515)                    | 54106 (66%)              | 276 (12)                      | 3362 (502)                    |
| French                           | 80068 (25.4%)       | 275 (12)                      | 3283 (512)                    | 23579 (28.8%)            | 275 (12)                      | 3296 (501)                    |
| Italian                          | 11523 (3.7%)        | 275 (12)                      | 3252 (494)                    | 4283 (5.2%)              | 275 (11)                      | 3268 (500)                    |
| <b>Socio-economic position</b>   |                     |                               |                               |                          |                               |                               |
| 1st quintile                     | 63230 (20.1%)       | 276 (12)                      | 3318 (522)                    | 15752 (19.2%)            | 276 (12)                      | 3331 (501)                    |
| 2nd quintile                     | 63199 (20.1%)       | 276 (12)                      | 3324 (519)                    | 16034 (19.6%)            | 276 (12)                      | 3334 (505)                    |
| 3rd quintile                     | 63156 (20%)         | 276 (12)                      | 3329 (516)                    | 16555 (20.2%)            | 276 (12)                      | 3337 (500)                    |
| 4th quintile                     | 62970 (20%)         | 276 (12)                      | 3335 (509)                    | 16933 (20.7%)            | 276 (12)                      | 3344 (500)                    |
| 5th quintile                     | 62622 (19.9%)       | 276 (12)                      | 3335 (507)                    | 16694 (20.4%)            | 276 (12)                      | 3346 (502)                    |



**Table 2. Associations of mean gestational age at birth and mean birth weight with pregnancy, parental and environmental factors from adjusted linear mixed-effects model (model 3).**

|                                                          | Gestational age (days)        |                          | Birth weight (g) *                   |                                      |
|----------------------------------------------------------|-------------------------------|--------------------------|--------------------------------------|--------------------------------------|
|                                                          | Absolute differences (95% CI) |                          | Relative differences (95% CI)        |                                      |
|                                                          | Eligible population           | Complete case population | Eligible population                  | Complete case population             |
| <b>Intercept</b>                                         | 277.3 (277.2 to 277.5)        | 277.9 (277.7 to 278.2)   | 3278 (3218 to 3339) <sup>&amp;</sup> | 3298 (3180 to 3420) <sup>&amp;</sup> |
| <b>Sex</b>                                               |                               |                          |                                      |                                      |
| Female                                                   | 0                             | 0                        | 1                                    | 1                                    |
| Male                                                     | -0.56 (-0.65, -0.48)          | -0.63 (-0.79, -0.47)     | 1.045 (1.044 to 1.046)               | 1.048 (1.046, 1.049)                 |
| <b>Birth rank</b>                                        |                               |                          |                                      |                                      |
| 1 <sup>¶</sup>                                           | 0                             | 0                        | 1                                    | 1                                    |
| 2                                                        | -0.39 (-0.49, -0.29)          | -0.34 (-0.52, -0.16)     | 1.038 (1.037, 1.039)                 | 1.039 (1.037, 1.041)                 |
| 3                                                        | -0.37 (-0.52, -0.22)          | -0.16 (-0.44, 0.11)      | 1.050 (1.048, 1.051)                 | 1.054 (1.051, 1.057)                 |
| ≥ 4                                                      | -0.24 (-0.50, 0.02)           | 0.24 (-0.25, 0.72)       | 1.058 (1.056, 1.061)                 | 1.065 (1.059, 1.070)                 |
| <b>Age mother (yrs)<sup>‡</sup></b>                      |                               |                          |                                      |                                      |
| < 20 (per 5 yrs decr.)                                   | -4.10 (-5.59, -2.61)          | -                        | 1.002 (0.987, 1.017)                 | -                                    |
| ≥ 20-30 <sup>¶</sup>                                     | 0                             | 0                        | 1                                    | 1                                    |
| ≥ 30-40 (per 5 yrs)                                      | -0.99 (-1.06, -0.91)          | -0.93 (-1.07, -0.78)     | 1.000 (1.000, 1.001)                 | 0.998 (0.997, 1.000)                 |
| ≥ 40 (per 5 yrs)                                         | -2.93 (-3.36, -2.50)          | -3.46 (-4.29, -2.63)     | 0.998 (0.994, 1.003)                 | 0.998 (0.990, 1.006)                 |
| <b>Civil status<sup>◊</sup></b>                          |                               |                          |                                      |                                      |
| Married                                                  | 0                             | 0                        | 1                                    | 1                                    |
| Not married                                              | -0.01 (-0.13, 0.10)           | 0.15 (-0.08, 0.38)       | 0.990 (0.989, 0.991)                 | 0.993 (0.99, 0.995)                  |
| <b>Nationality mother</b>                                |                               |                          |                                      |                                      |
| Switzerland <sup>¶</sup>                                 | 0                             | 0                        | 1                                    | 1                                    |
| S Europe                                                 | 0.20 (-0.01, 0.40)            | 0.39 (0.0, 0.78)         | 0.994 (0.992, 0.996)                 | 0.995 (0.991, 0.999)                 |
| W Europe                                                 | 0.20 (0.02, 0.38)             | -0.08 (-0.43, 0.26)      | 1.008 (1.006, 1.010)                 | 1.007 (1.004, 1.011)                 |
| N Europe                                                 | 0.37 (-0.07, 0.81)            | 0.30 (-0.57, 1.17)       | 1.025 (1.020, 1.029)                 | 1.022 (1.013, 1.031)                 |
| E Europe                                                 | 0.21 (0.04, 0.38)             | 0.33 (-0.01, 0.68)       | 1.013 (1.011, 1.014)                 | 1.017 (1.014, 1.021)                 |
| Other                                                    | -0.32 (-0.49, -0.14)          | -0.67 (-1.05, -0.30)     | 1.007 (1.005, 1.008)                 | 1.012 (1.008, 1.016)                 |
| <b>Nationality father</b>                                |                               |                          |                                      |                                      |
| Switzerland <sup>¶</sup>                                 | 0                             | 0                        | 1                                    | 1                                    |
| S Europe                                                 | -0.46 (-0.64, -0.28)          | -0.28 (-0.62, 0.06)      | 0.991 (0.990, 0.993)                 | 0.993 (0.989, 0.996)                 |
| W Europe                                                 | 0.07 (-0.11, 0.25)            | 0.30 (-0.04, 0.63)       | 1.008 (1.006, 1.009)                 | 1.006 (1.003, 1.010)                 |
| N Europe                                                 | 0.51 (0.08, 0.94)             | -0.24 (-1.09, 0.62)      | 1.013 (1.009, 1.017)                 | 1.011 (1.003, 1.020)                 |
| E Europe                                                 | -0.46 (-0.64, -0.28)          | -0.01 (-0.38, 0.36)      | 1.009 (1.007, 1.010)                 | 1.011 (1.008, 1.015)                 |
| Other                                                    | -0.02 (-0.22, 0.18)           | 0.48 (0.05, 0.90)        | 0.992 (0.991, 0.994)                 | 0.992 (0.987, 0.996)                 |
| missing                                                  | -3.87 (-4.24, -3.50)          | -                        | 0.989 (0.985, 0.992)                 | -                                    |
| <b>Education mother</b>                                  |                               |                          |                                      |                                      |
| Tertiary <sup>¶</sup>                                    |                               | 0                        |                                      | 1                                    |
| Secondary                                                |                               | -0.55 (-0.74, -0.36)     |                                      | 0.996 (0.995, 0.998)                 |
| Compulsory                                               |                               | -0.90 (-1.22, -0.58)     |                                      | 0.993 (0.990, 0.996)                 |
| <b>Education father</b>                                  |                               |                          |                                      |                                      |
| Tertiary <sup>¶</sup>                                    |                               | 0                        |                                      | 1                                    |
| Secondary                                                |                               | -0.16 (-0.35, 0.03)      |                                      | 0.996 (0.994, 0.998)                 |
| Compulsory                                               |                               | -0.25 (-0.58, 0.07)      |                                      | 0.997 (0.994, 1.000)                 |
| <b>Altitude (m)</b>                                      |                               |                          |                                      |                                      |
| 500 <sup>¶</sup>                                         | 0                             | 0                        | 1                                    | 1                                    |
| per 500 m increase                                       | 0.07 (-0.09, 0.23)            | 0.03 (-0.24, 0.30)       | 0.989 (0.988, 0.991)                 | 0.989 (0.987, 0.992)                 |
| <b>Urbanization</b>                                      |                               |                          |                                      |                                      |
| Urban <sup>¶</sup>                                       | 0                             | 0                        | 1                                    | 1                                    |
| Peri-urban                                               | -0.43 (-0.57, -0.28)          | -0.59 (-0.82, -0.36)     | 1.001 (1.000, 1.002)                 | 1.003 (1.000, 1.005)                 |
| Rural                                                    | -0.15 (-0.32, 0.02)           | -0.29 (-0.55, -0.02)     | 1.000 (0.998, 1.001)                 | 1.003 (1.001, 1.006)                 |
| <b>Language region</b>                                   |                               |                          |                                      |                                      |
| German <sup>¶</sup>                                      | 0                             | 0                        | 1                                    | 1                                    |
| French                                                   | -0.62 (-0.77, -0.47)          | -0.66 (-0.88, -0.44)     | 0.989 (0.987, 0.990)                 | 0.988 (0.985, 0.990)                 |
| Italian                                                  | -0.94 (-1.26, -0.63)          | -1.11 (-1.55, -0.68)     | 0.982 (0.980, 0.985)                 | 0.983 (0.979, 0.987)                 |
| <b>Percent of spatial variance explained<sup>†</sup></b> | 31%                           | 39%                      | 87%                                  | 88%                                  |

\*Birth weight was modelled on a log scale, which results in multiplicative effects. The model for birth weight was additionally adjusted for gestational age by a cubic spline function with knots at weeks 25, 30 and 35.

& In the model for BW, the intercept corresponds to an estimated mean birth weight (g) for a singleton girl born at gestational age 40 weeks as the first child (rank 1) in a German-speaking, urban region of elevation 500m, whose mother is 20-30 years old at birth and married, and both parents have Swiss nationality and tertiary education.

¶ Reference category

‡ Age modelled by a piece-wise linear function: constant at reference range ≥20-30, and separate slopes for age <20, ≥30-40, and ≥40.

◊ Married or in registered partnership / Not married: Single, widow, divorced or in dissolved partnership

† Percentage of regional variance explained by model predictors, i.e. percent reduction in variance of random effects ( $\sigma^2$ ) when compared to model with no predictors (model 0).

**Table 3. Percentage of spatial variation explained by each individual variable and explained in addition after adjusting for all other variables.**

| Spatial variation explained               |                      | Gestational age     |                          | Birth weight        |                          |
|-------------------------------------------|----------------------|---------------------|--------------------------|---------------------|--------------------------|
|                                           |                      | Eligible population | Complete case population | Eligible population | Complete case population |
| <b>By single variables</b>                |                      |                     |                          |                     |                          |
| <b>Pregnancy factors</b>                  | Gestational age      | -                   | -                        | 27%                 | 34%                      |
|                                           | Sex                  | 0%                  | 0%                       | 1%                  | 2%                       |
|                                           | Birth rank           | 0%                  | 1%                       | 4%                  | 0%                       |
| <b>Parental factors</b>                   | Maternal age         | 0%                  | 1%                       | 1%                  | 1%                       |
|                                           | Civil status         | 0%                  | 0%                       | 10%                 | 5%                       |
|                                           | Nationality mother   | 1%                  | 3%                       | 17%                 | 17%                      |
|                                           | Nationality father   | 3%                  | 4%                       | 25%                 | 20%                      |
|                                           | Nationality parents* | 3%                  | 5%                       | 27%                 | 23%                      |
|                                           | Education mother     | -                   | 1%                       | -                   | 0%                       |
|                                           | Education father     | -                   | 1%                       | -                   | 1%                       |
| Education parents*                        | -                    | 1%                  | -                        | 1%                  |                          |
| <b>Regional factors</b>                   | Altitude             | 0%                  | 0%                       | 10%                 | 6%                       |
|                                           | Urbanization         | 10%                 | 12%                      | 0%                  | 0%                       |
|                                           | Language region      | 23%                 | 25%                      | 62%                 | 63%                      |
| <b>In addition to all other variables</b> |                      |                     |                          |                     |                          |
| <b>Pregnancy factors</b>                  | Gestational age      | -                   | -                        | 12%                 | 12%                      |
|                                           | Sex                  | 0%                  | 0%                       | 0%                  | 1%                       |
|                                           | Birth rank           | 1%                  | 0%                       | 3%                  | 1%                       |
| <b>Parental factors</b>                   | Maternal age         | 0%                  | 1%                       | 0%                  | 0%                       |
|                                           | Civil status         | 0%                  | 0%                       | 0%                  | 0%                       |
|                                           | Nationality mother   | 0%                  | 0%                       | 1%                  | 2%                       |
|                                           | Nationality father   | 1.5%                | 0%                       | 1%                  | 0%                       |
|                                           | Nationality parents* | 2.5%                | 0%                       | 3%                  | 4%                       |
|                                           | Education mother     | -                   | 2%                       | -                   | 0%                       |
|                                           | Education father     | -                   | 0%                       | -                   | 0%                       |
| Education parents*                        | -                    | 2%                  | -                        | 1%                  |                          |
| <b>Regional factors</b>                   | Altitude             | 0%                  | 0%                       | 9%                  | 4%                       |
|                                           | Urbanization         | 9%                  | 10%                      | 0%                  | 1%                       |
|                                           | Language region      | 17%                 | 21%                      | 22%                 | 24%                      |
| <b>Model 3 (full)</b>                     |                      | <b>31%</b>          | <b>39%</b>               | <b>87%</b>          | <b>88%</b>               |

- Data not available

\* Nationality or educational attainment of both mother and father were entered into the model.

## FIGURE LEGENDS

**Figure 1.** Maps of average gestational age (upper two panels) and birth weight (lower two panels) observed across 705 Swiss areas. Left: all eligible live births (n=315,177), right: complete case population (n=81,968). Note that 277 days correspond to 39<sup>4/7</sup> weeks. The orientation of the maps is standard, with North being up.

**Figure 2.** Maps of gestational age and birth weight from crude model (model 0) and multivariable linear mixed-effect models (models 1-3) with percent reduction in the regional variation, represented by random effects. Analyses based on complete case population (N = 81,968). The orientation of the maps is standard, with North being up.

## FOOTNOTES

**Contributors:** ME and CEK conceived the study and obtained funding. VS, ME, MZ and CEK developed the analysis plan. VS did all statistical analyses and wrote the first draft of the paper, which was revised by ME taking into account the critical comments from CEK, MZ, MA and NL. ME supervised the study. All authors approved the final version of the report.

**Funding:** The Swiss National Cohort is funded by the Swiss National Science Foundation (SNSF) cohort grant No. 148415. The current analysis was funded by SNSF project grant No. 163452. ME was supported by special SNSF project funding (grant No. 174281).

**Competing interests:** None declared.

**Patient consent:** Not required.

**Ethics approval:** The SNC has been approved by the Ethics Committee of the Canton of Bern.

**Provenance and peer review:** Not commissioned; externally peer reviewed.

**Data sharing statement:** Data are available within the framework of a data sharing agreement.

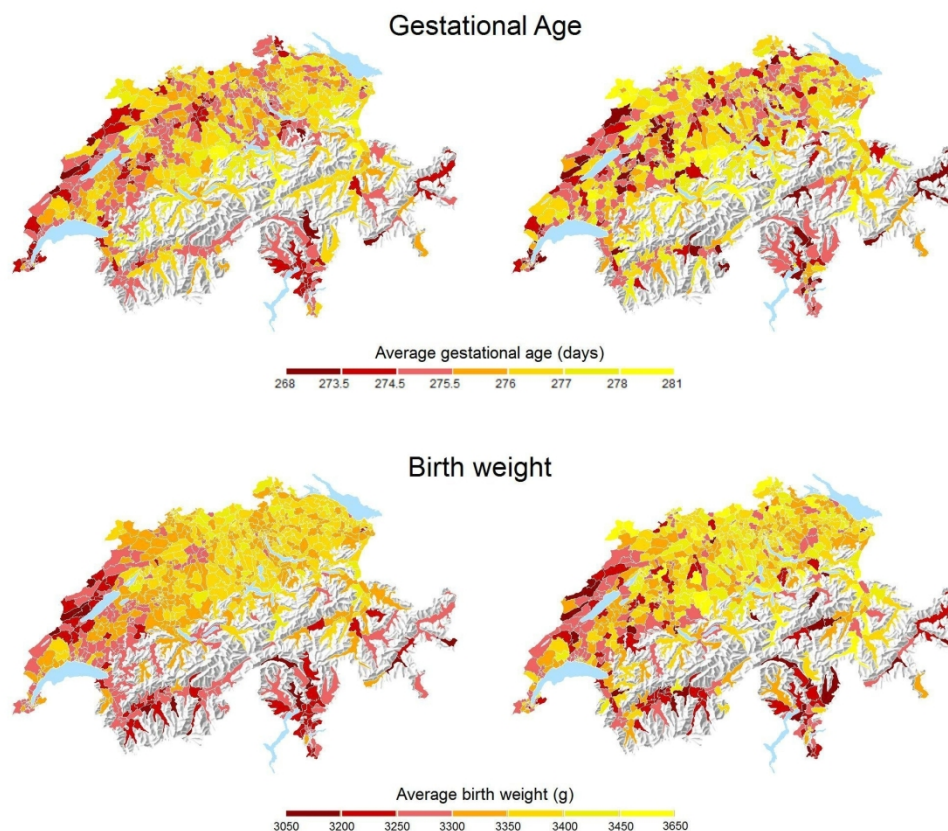

35 Figure 1. Maps of average gestational age (upper two panels) and birth weight (lower two panels) observed  
36 across 705 Swiss areas. Left: all eligible live births (n=315,177), right: complete case population  
37 (n=81,968). Note that 277 days correspond to 394/7 weeks. The orientation of the maps is standard, with  
38 North being up.

39 172x152mm (300 x 300 DPI)

40  
41  
42  
43  
44  
45  
46  
47  
48  
49  
50  
51  
52  
53  
54  
55  
56  
57  
58  
59  
60

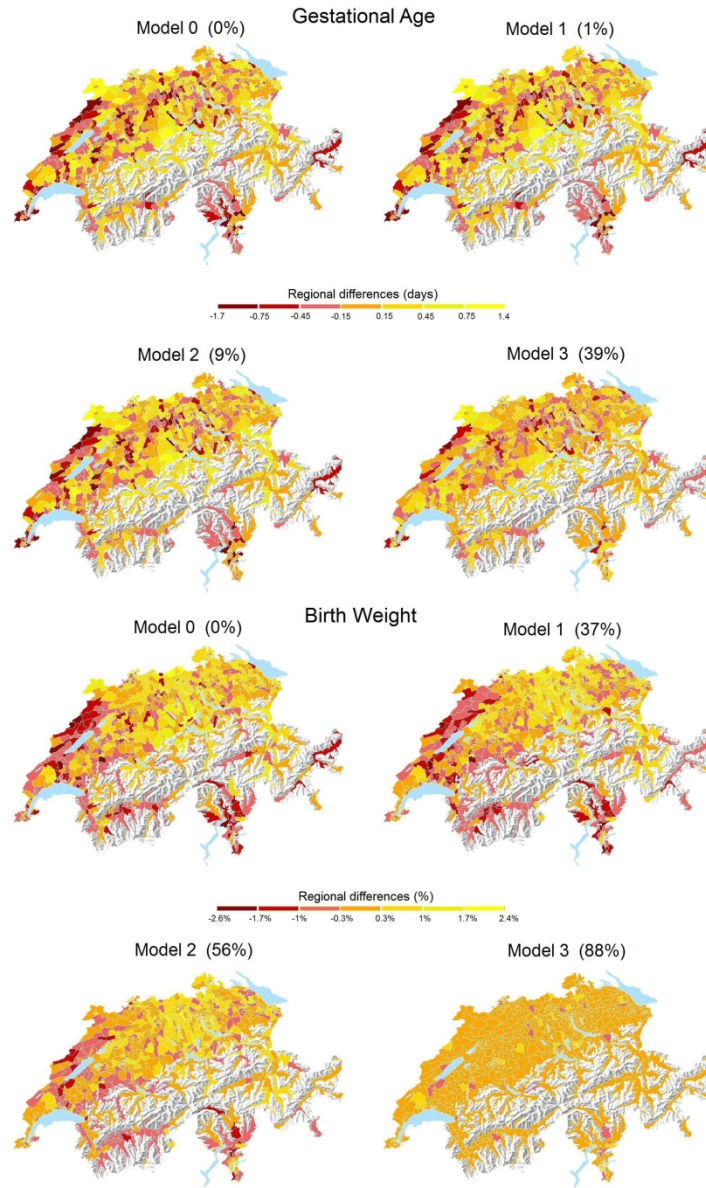

45 Figure 2. Maps of gestational age and birth weight from crude model (model 0) and multivariable linear  
46 mixed-effect models (models 1-3) with percent reduction in the regional variation, represented by random  
47 effects. Analyses based on complete case population (N = 81,968). The orientation of the maps is standard,  
48 with North being up.

49 172x279mm (300 x 300 DPI)

Supplementary Table S1. Number of live births, mean gestational age and mean birth weight by maternal nationality in the eligible population ( $N = 315'177$ ); 276 days correspond to 39<sup>3/7</sup> weeks.

| Nationality               | N              | Gestational age (days)<br>Mean (SD) | Birth weight (g)<br>Mean (SD) |            |
|---------------------------|----------------|-------------------------------------|-------------------------------|------------|
| Switzerland               | 194,570        | 276 (12)                            | 3322 (511)                    |            |
| <b>Southern Europe</b>    |                |                                     |                               |            |
| Andorra                   | 1              | 279 (-)                             | 3080 (-)                      |            |
| Italy                     | 8337           | 275 (12)                            | 3271 (496)                    |            |
| Malta                     | 13             | 273 (8)                             | 3188 (427)                    |            |
| Portugal                  | 12,368         | 276 (12)                            | 3235 (493)                    |            |
| San Marino                | 2              | 274 (1.4)                           | 3485 (120)                    |            |
| Spain                     | 2864           | 276 (12)                            | 3263 (488)                    |            |
| <b>Western Europe</b>     |                |                                     |                               |            |
| Austria                   | 1555           | 275 (14)                            | 3328 (528)                    |            |
| Belgium                   | 583            | 276 (12)                            | 3357 (482)                    |            |
| Germany                   | 16,736         | 276 (13)                            | 3369 (517)                    |            |
| France                    | 6173           | 276 (12)                            | 3294 (505)                    |            |
| Lichtenstein              | 100            | 275 (11)                            | 3369 (488)                    |            |
| Luxembourg                | 55             | 276 (19)                            | 3396 (636)                    |            |
| Netherlands               | 803            | 276 (12)                            | 3377 (529)                    |            |
| <b>Northern Europe</b>    |                |                                     |                               |            |
| Denmark                   | 271            | 276 (13)                            | 3383 (511)                    |            |
| Estonia                   | 81             | 279 (7)                             | 3601 (466)                    |            |
| Finland                   | 312            | 276 (11)                            | 3465 (523)                    |            |
| Ireland                   | 212            | 276 (16)                            | 3446 (548)                    |            |
| Iceland                   | 31             | 272 (25)                            | 3180 (775)                    |            |
| Latvia                    | 187            | 279 (9)                             | 3493 (434)                    |            |
| Lithuania                 | 152            | 277 (13)                            | 3450 (535)                    |            |
| Norway                    | 110            | 275 (11)                            | 3390 (525)                    |            |
| Sweden                    | 571            | 276 (12)                            | 3422 (470)                    |            |
| UK                        | 1768           | 276 (13)                            | 3397 (513)                    |            |
| <b>Eastern Europe</b>     |                |                                     |                               |            |
| Czech Republic            | 623            | 275 (12)                            | 3339 (499)                    |            |
| Hungary                   | 913            | 275 (13)                            | 3341 (512)                    |            |
| Poland                    | 1778           | 276 (12)                            | 3399 (497)                    |            |
| Slovakia                  | 1068           | 276 (12)                            | 3348 (509)                    |            |
| Albania                   | 209            | 276 (12)                            | 3406 (476)                    |            |
| Bosnia & Herzegovina      | 1952           | 276 (12)                            | 3466 (492)                    |            |
| Croatia                   | 1582           | 276 (12)                            | 3448 (540)                    |            |
| Kosovo                    | 10,278         | 276 (13)                            | 3421 (530)                    |            |
| Macedonia                 | 5842           | 276 (13)                            | 3392 (514)                    |            |
| Montenegro                | 212            | 276 (10)                            | 3416 (466)                    |            |
| Serbia                    | 5195           | 276 (13)                            | 3400 (536)                    |            |
| Serbia & Montenegro       | 10             | 277 (8)                             | 3637 (250)                    |            |
| Slovenia                  | 163            | 275 (15)                            | 3366 (589)                    |            |
| Cyprus                    | 15             | 278 (8)                             | 3411 (525)                    |            |
| Bulgaria                  | 406            | 273 (15)                            | 3291 (559)                    |            |
| Greece                    | 375            | 274 (13)                            | 3317 (516)                    |            |
| Romania                   | 971            | 274 (14)                            | 3284 (537)                    |            |
| Turkey                    | 4441           | 275 (13)                            | 3347 (523)                    |            |
| Belarus                   | 172            | 277 (13)                            | 3385 (508)                    |            |
| Moldova                   | 135            | 276 (10)                            | 3496 (515)                    |            |
| Russia                    | 1567           | 277 (12)                            | 3427 (513)                    |            |
| Ukraine                   | 855            | 277 (11)                            | 3412 (473)                    |            |
| <b>Other (non-Europe)</b> |                |                                     |                               |            |
| 6 most numerous:          | Eritrea        | 2600                                | 279 (14)                      | 3380 (528) |
|                           | Brazil         | 2381                                | 274 (12)                      | 3312 (498) |
|                           | Sri Lanka      | 1391                                | 273 (14)                      | 3158 (553) |
|                           | USA            | 1291                                | 276 (14)                      | 3378 (532) |
|                           | China          | 1293                                | 276 (13)                      | 3425 (541) |
|                           | Morocco        | 1159                                | 276 (14)                      | 3378 (536) |
|                           | ...            |                                     |                               |            |
| <b>Total</b>              | <b>315,177</b> | <b>276 (12)</b>                     | <b>3328 (515)</b>             |            |



**Supplementary Table S2. Comparison of results from fully adjusted model (model 3) accounting and not accounting for spatial autocorrelation. Based on complete-case population (N = 81,968).**

|                                       | Accounting for spatial autocorrelation                     |                                                        | Not accounting for spatial autocorrelation                 |                                                        |
|---------------------------------------|------------------------------------------------------------|--------------------------------------------------------|------------------------------------------------------------|--------------------------------------------------------|
|                                       | Gestational age (days)<br>Absolute differences<br>(95% CI) | Birth weight (g) *<br>Relative differences<br>(95% CI) | Gestational age (days)<br>Absolute differences<br>(95% CI) | Birth weight (g) *<br>Relative differences<br>(95% CI) |
| Intercept                             | 277.9 (277.6 to 278.1)                                     | 3293 (3163 to 3427)                                    | 277.9 (277.7 to 278.2)                                     | 3298 (3180 to 3420) <sup>§</sup>                       |
| <b>Sex</b>                            |                                                            |                                                        |                                                            |                                                        |
| <sup>¶</sup> Female                   | 0                                                          |                                                        | 0                                                          | 1                                                      |
| Male                                  | -0.62 (-0.78, -0.46)                                       | 1.048 (1.046, 1.049)                                   | -0.63 (-0.79, -0.47)                                       | 1.048 (1.046, 1.049)                                   |
| <b>Birth rank</b>                     |                                                            |                                                        |                                                            |                                                        |
| 1 <sup>¶</sup>                        | 0                                                          |                                                        | 0                                                          | 1                                                      |
| 2                                     | -0.34 (-0.52, -0.17)                                       | 1.039 (1.037, 1.041)                                   | -0.34 (-0.52, -0.16)                                       | 1.039 (1.037, 1.041)                                   |
| 3                                     | -0.17 (-0.45, 0.10)                                        | 1.054 (1.051, 1.056)                                   | -0.16 (-0.44, 0.11)                                        | 1.054 (1.051, 1.057)                                   |
| ≥ 4                                   | 0.23 (-0.26, 0.71)                                         | 1.065 (1.059, 1.070)                                   | 0.24 (-0.25, 0.72)                                         | 1.065 (1.059, 1.070)                                   |
| <b>Maternal age (yrs)<sup>‡</sup></b> |                                                            |                                                        |                                                            |                                                        |
| ≥ 20-30 <sup>¶</sup>                  | 0                                                          |                                                        | 0                                                          | 1                                                      |
| ≥ 30-40 yrs (per 5 yrs)               | -0.92 (-1.06, -0.77)                                       | 0.998 (0.996, 1.000)                                   | -0.93 (-1.07, -0.78)                                       | 0.998 (0.997, 1.000)                                   |
| ≥ 40 yrs (per 5 yrs)                  | -3.48 (-4.30, -2.66)                                       | 0.998 (0.990, 1.006)                                   | -3.46 (-4.29, -2.63)                                       | 0.998 (0.990, 1.006)                                   |
| <b>Civil status<sup>¶</sup></b>       |                                                            |                                                        |                                                            |                                                        |
| Married <sup>¶</sup>                  | 0                                                          |                                                        | 0                                                          | 1                                                      |
| Not married                           | 0.15 (-0.08, 0.38)                                         | 0.993 (0.990, 0.995)                                   | 0.15 (-0.08, 0.38)                                         | 0.993 (0.990, 0.995)                                   |
| <b>Nationality mother</b>             |                                                            |                                                        |                                                            |                                                        |
| Switzerland <sup>¶</sup>              | 0                                                          |                                                        | 0                                                          | 1                                                      |
| S Europe                              | 0.38 (0.00, 0.77)                                          | 0.995 (0.992, 0.999)                                   | 0.39 (0.00, 0.78)                                          | 0.995 (0.991, 0.999)                                   |
| W Europe                              | -0.08 (-0.42, 0.25)                                        | 1.007 (1.003, 1.010)                                   | -0.08 (-0.43, 0.26)                                        | 1.007 (1.004, 1.011)                                   |
| N Europe                              | 0.30 (-0.56, 1.17)                                         | 1.022 (1.013, 1.031)                                   | 0.30 (-0.57, 1.17)                                         | 1.022 (1.013, 1.031)                                   |
| E Europe                              | 0.33 (-0.01, 0.67)                                         | 1.017 (1.013, 1.021)                                   | 0.33 (-0.01, 0.68)                                         | 1.017 (1.014, 1.021)                                   |
| Other                                 | -0.66 (-1.03, -0.29)                                       | 1.012 (1.008, 1.015)                                   | -0.67 (-1.05, -0.30)                                       | 1.012 (1.008, 1.016)                                   |
| <b>Nationality father</b>             |                                                            |                                                        |                                                            |                                                        |
| Switzerland <sup>¶</sup>              | 0                                                          |                                                        | 0                                                          | 1                                                      |
| S Europe                              | -0.28 (-0.61, 0.06)                                        | 0.992 (0.989, 0.996)                                   | -0.28 (-0.62, 0.06)                                        | 0.993 (0.989, 0.996)                                   |
| W Europe                              | 0.30 (-0.03, 0.64)                                         | 1.006 (1.002, 1.009)                                   | 0.30 (-0.04, 0.63)                                         | 1.006 (1.003, 1.010)                                   |
| N Europe                              | -0.21 (-1.06, 0.63)                                        | 1.011 (1.002, 1.019)                                   | -0.24 (-1.09, 0.62)                                        | 1.011 (1.003, 1.020)                                   |
| E Europe                              | -0.02 (-0.38, 0.35)                                        | 1.011 (1.007, 1.015)                                   | -0.01 (-0.38, 0.36)                                        | 1.011 (1.008, 1.015)                                   |
| Other                                 | 0.49 (0.06, 0.91)                                          | 0.991 (0.987, 0.996)                                   | 0.48 (0.05, 0.90)                                          | 0.992 (0.987, 0.996)                                   |
| <b>Education mother</b>               |                                                            |                                                        |                                                            |                                                        |
| Tertiary <sup>¶</sup>                 |                                                            |                                                        | 0                                                          | 1                                                      |
| Secondary                             | -0.56 (-0.75, -0.37)                                       | 0.997 (0.995, 0.999)                                   | -0.55 (-0.74, -0.36)                                       | 0.996 (0.995, 0.998)                                   |
| Compulsory                            | -0.92 (-1.23, -0.60)                                       | 0.993 (0.990, 0.997)                                   | -0.90 (-1.22, -0.58)                                       | 0.993 (0.990, 0.996)                                   |
| <b>Education father</b>               |                                                            |                                                        |                                                            |                                                        |
| Tertiary <sup>¶</sup>                 |                                                            |                                                        | 0                                                          | 1                                                      |
| Secondary                             | -0.16 (-0.35, 0.03)                                        | 0.997 (0.995, 0.999)                                   | -0.16 (-0.35, 0.03)                                        | 0.996 (0.994, 0.998)                                   |
| Compulsory                            | -0.25 (-0.57, 0.07)                                        | 0.997 (0.994, 1.001)                                   | -0.25 (-0.58, 0.07)                                        | 0.997 (0.994, 1.000)                                   |
| <b>Altitude (m)</b>                   |                                                            |                                                        |                                                            |                                                        |
| 500 <sup>¶</sup>                      | 0                                                          |                                                        | 0                                                          | 1                                                      |
| per 500 m increase                    | -0.05 (-0.33, 0.24)                                        | 0.991 (0.987, 0.994)                                   | 0.03 (-0.24, 0.30)                                         | 0.989 (0.987, 0.992)                                   |
| <b>Urbanization</b>                   |                                                            |                                                        |                                                            |                                                        |
| Urban <sup>¶</sup>                    | 0                                                          |                                                        | 0                                                          | 1                                                      |
| Peri-urban                            | -0.54 (-0.75, -0.33)                                       | 1.001 (0.998, 1.004)                                   | -0.59 (-0.82, -0.36)                                       | 1.003 (1.000, 1.005)                                   |
| Rural                                 | -0.25 (-0.50, 0.00)                                        | 1.003 (0.999, 1.006)                                   | -0.29 (-0.55, -0.02)                                       | 1.003 (1.001, 1.006)                                   |
| <b>Language region</b>                |                                                            |                                                        |                                                            |                                                        |
| German <sup>¶</sup>                   | 0                                                          |                                                        | 0                                                          | 1                                                      |
| French                                | -0.33 (-0.75, 0.09)                                        | 0.991 (0.983, 0.998)                                   | -0.66 (-0.88, -0.44)                                       | 0.988 (0.985, 0.990)                                   |
| Italian                               | -1.10 (-1.50, -0.70)                                       | 0.984 (0.978, 0.989)                                   | -1.11 (-1.55, -0.68)                                       | 0.983 (0.979, 0.987)                                   |

\*Birth weight was modelled on a log scale, which results in multiplicative effects. The model for birth weight was additionally adjusted for gestational age by a cubic spline function with knots at weeks 25, 30 and 35.

<sup>§</sup> In the model for BW, the intercept corresponds to an estimated mean birth weight (g) for a singleton girl born at gestational age 40 weeks as the first child (rank 1) in a German-speaking, urban region of elevation 500 m, whose mother is 20-30 years old at birth and married, and both parents have Swiss nationality and tertiary education.

<sup>¶</sup> Reference category

<sup>‡</sup> Age modelled by a piece-wise linear function: constant at reference range ≥20-30, and separate slopes for age <20, ≥30-40, and ≥40. For ages ≥40, the total estimated effect is hence addition of 10-year effect in age group ≥30-40 plus the corresponding effect in age-group ≥40.

<sup>†</sup> Percentage of regional variance explained by model predictors, i.e. percent reduction in variance of random effects ( $\sigma^2$ ) when compared to model with no predictors (model 0).

**Supplementary Table S3. Comparison of results from model (model 3) for birth weight, adjusted and not adjusted for gestational age.**

|                                     | Birth weight - Model 3 without Gestational Age |                          | Birth weight - Model 3 with Gestational Age* |                                  |
|-------------------------------------|------------------------------------------------|--------------------------|----------------------------------------------|----------------------------------|
|                                     | Relative differences (95% CI)                  |                          |                                              |                                  |
|                                     | Eligible population                            | Complete case population | Eligible population                          | Complete case population         |
| <b>Intercept</b>                    | 3188 (3181 to 3195)                            | 3209 (3196 to 3222)      | 3278 (3218 to 3339) <sup>‡</sup>             | 3298 (3180 to 3420) <sup>‡</sup> |
| <b>Sex</b>                          |                                                |                          |                                              |                                  |
| <sup>¶</sup> Female                 | 1                                              | 1                        | 1                                            | 1                                |
| Male                                | 1.04 (1.038, 1.041)                            | 1.041 (1.039, 1.044)     | 1.045 (1.044 to 1.046)                       | 1.048 (1.046, 1.049)             |
| <b>Rank</b>                         |                                                |                          |                                              |                                  |
| 1 <sup>¶</sup>                      | 1                                              | 1                        | 1                                            | 1                                |
| 2                                   | 1.039 (1.038, 1.041)                           | 1.041 (1.038, 1.044)     | 1.038 (1.037, 1.039)                         | 1.039 (1.037, 1.041)             |
| 3                                   | 1.052 (1.049, 1.054)                           | 1.058 (1.054, 1.063)     | 1.050 (1.048, 1.051)                         | 1.054 (1.051, 1.057)             |
| ≥ 4                                 | 1.060 (1.056, 1.064)                           | 1.071 (1.063, 1.079)     | 1.058 (1.056, 1.061)                         | 1.065 (1.059, 1.070)             |
| <b>Age mother (yrs)<sup>‡</sup></b> |                                                |                          |                                              |                                  |
| < 20yrs (per 5 yrs decr.)           | 0.956 (0.935, 0.978)                           | -                        | 1.002 (0.987, 1.017)                         | -                                |
| ≥ 20-30 yrs <sup>¶</sup>            | 1                                              | 1                        | 1                                            | 1                                |
| ≥ 30-40 yrs (per 5 yrs)             | 0.991 (0.990, 0.992)                           | 0.990 (0.988, 0.993)     | 1.000 (1.000, 1.001)                         | 0.998 (0.997, 1.000)             |
| ≥ 40 yrs (per 5 yrs)                | 0.973 (0.967, 0.979)                           | 0.967 (0.955, 0.979)     | 0.998 (0.994, 1.003)                         | 0.998 (0.990, 1.006)             |
| <b>Civil status<sup>¶</sup></b>     |                                                |                          |                                              |                                  |
| Married <sup>¶</sup>                | 1                                              | 1                        | 1                                            | 1                                |
| Not married                         | 0.989 (0.987, 0.990)                           | 0.992 (0.989, 0.996)     | 0.990 (0.989, 0.991)                         | 0.993 (0.99, 0.995)              |
| <b>Nationality mother</b>           |                                                |                          |                                              |                                  |
| Switzerland <sup>¶</sup>            | 1                                              | 1                        | 1                                            | 1                                |
| S Europe                            | 0.996 (0.993, 0.999)                           | 0.999 (0.993, 1.005)     | 0.994 (0.992, 0.996)                         | 0.995 (0.991, 0.999)             |
| W Europe                            | 1.010 (1.007, 1.013)                           | 1.006 (1.001, 1.011)     | 1.008 (1.006, 1.010)                         | 1.007 (1.004, 1.011)             |
| N Europe                            | 1.027 (1.020, 1.034)                           | 1.024 (1.010, 1.037)     | 1.025 (1.020, 1.029)                         | 1.022 (1.013, 1.031)             |
| E Europe                            | 1.014 (1.011, 1.016)                           | 1.020 (1.015, 1.026)     | 1.013 (1.011, 1.014)                         | 1.017 (1.014, 1.021)             |
| Other                               | 1.003 (1.000, 1.006)                           | 1.005 (0.999, 1.010)     | 1.007 (1.005, 1.008)                         | 1.012 (1.008, 1.016)             |
| <b>Nationality father</b>           |                                                |                          |                                              |                                  |
| Switzerland <sup>¶</sup>            | 1                                              | 1                        | 1                                            | 1                                |
| S Europe                            | 0.988 (0.985, 0.991)                           | 0.991 (0.986, 0.996)     | 0.991 (0.990, 0.993)                         | 0.993 (0.989, 0.996)             |
| W Europe                            | 1.008 (1.005, 1.011)                           | 1.009 (1.004, 1.014)     | 1.008 (1.006, 1.009)                         | 1.006 (1.003, 1.010)             |
| N Europe                            | 1.017 (1.010, 1.024)                           | 1.007 (0.994, 1.019)     | 1.013 (1.009, 1.017)                         | 1.011 (1.003, 1.020)             |
| E Europe                            | 1.003 (1.000, 1.006)                           | 1.010 (1.004, 1.015)     | 1.009 (1.007, 1.010)                         | 1.011 (1.008, 1.015)             |
| Other                               | 0.990 (0.987, 0.993)                           | 0.997 (0.990, 1.003)     | 0.992 (0.991, 0.994)                         | 0.992 (0.987, 0.996)             |
| missing                             | 0.933 (0.928, 0.938)                           | -                        | 0.989 (0.985, 0.992)                         | -                                |
| <b>Education mother</b>             |                                                |                          |                                              |                                  |
| Tertiary <sup>¶</sup>               | -                                              | 1                        | -                                            | 1                                |
| Secondary                           | -                                              | 0.992 (0.989, 0.995)     | -                                            | 0.996 (0.995, 0.998)             |
| Compulsory                          | -                                              | 0.984 (0.979, 0.989)     | -                                            | 0.993 (0.990, 0.996)             |
| <b>Education father</b>             |                                                |                          |                                              |                                  |
| Tertiary <sup>¶</sup>               | -                                              | 1                        | -                                            | 1                                |
| Secondary                           | -                                              | 0.995 (0.992, 0.997)     | -                                            | 0.996 (0.994, 0.998)             |
| Compulsory                          | -                                              | 0.995 (0.990, 1.000)     | -                                            | 0.997 (0.994, 1.000)             |
| <b>Altitude (m)</b>                 |                                                |                          |                                              |                                  |
| 500 m <sup>¶</sup>                  | 1                                              | 1                        | 1                                            | 1                                |
| per 500 m increase                  | 0.990 (0.988, 0.992)                           | 0.989 (0.985, 0.993)     | 0.989 (0.988, 0.991)                         | 0.989 (0.987, 0.992)             |
| <b>Urbanization</b>                 |                                                |                          |                                              |                                  |
| Urban <sup>¶</sup>                  | 1                                              | 1                        | 1                                            | 1                                |
| Peri-urban                          | 0.998 (0.996, 1.000)                           | 0.998 (0.995, 1.002)     | 1.001 (1.000, 1.002)                         | 1.003 (1.000, 1.005)             |
| Rural                               | 0.999 (0.996, 1.001)                           | 1.001 (0.997, 1.005)     | 1.000 (0.998, 1.001)                         | 1.003 (1.001, 1.006)             |
| <b>Language region</b>              |                                                |                          |                                              |                                  |
| <sup>‡</sup> German <sup>¶</sup>    | 1                                              | 1                        | 1                                            | 1                                |
| French                              | 0.985 (0.983, 0.987)                           | 0.983 (0.980, 0.986)     | 0.989 (0.987, 0.990)                         | 0.988 (0.985, 0.990)             |
| Italian                             | 0.977 (0.973, 0.981)                           | 0.976 (0.970, 0.982)     | 0.982 (0.980, 0.985)                         | 0.983 (0.979, 0.987)             |
| <b>% variation explained</b>        |                                                |                          |                                              |                                  |
| Model 3                             | 77%                                            | 76%                      | 87%                                          | 88%                              |
| Model 2                             | 25%                                            | 27%                      | 52%                                          | 56%                              |
| Model 1                             | 2%                                             | 5%                       | 31%                                          | 37%                              |

\*Birth weight was modelled on a log scale, which results in multiplicative effects.

<sup>¶</sup> Reference category

<sup>‡</sup> Age modelled by a piece-wise linear function: constant at reference range ≥20-30, and separate slopes for age <20, ≥30-40, and ≥40. For ages ≥40, the total estimated effect is hence addition of 10-year effect in age group ≥30-40 plus the corresponding effect in age-group ≥40.

<sup>†</sup> Percentage of regional variance explained by model predictors, i.e. percent reduction in variance of random effects ( $\sigma^2$ ) when compared to model with no predictors (model 0).



**Supplementary Table S4. Comparison of results from fully adjusted model without and with additionally including Swiss index of socio-economic position (SEP). Based on eligible population (N = 315,177); 277 days correspond to 39<sup>4/7</sup> weeks.**

|                                     | Model 3 without SEP                                        |                                                        | Model 3 with SEP                                           |                                                        |
|-------------------------------------|------------------------------------------------------------|--------------------------------------------------------|------------------------------------------------------------|--------------------------------------------------------|
|                                     | Gestational age (days)<br>Absolute differences<br>(95% CI) | Birth weight (g) *<br>Relative differences<br>(95% CI) | Gestational age (days)<br>Absolute differences<br>(95% CI) | Birth weight (g) *<br>Relative differences<br>(95% CI) |
| <b>Intercept</b>                    | 277.3 (277.2 to 277.5)                                     | 3278 (3218 to 3339) <sup>&amp;</sup>                   | 277.3 (277.2 to 277.5)                                     | 3278 (3218 to 3339) <sup>&amp;</sup>                   |
| <b>Sex</b>                          |                                                            |                                                        |                                                            |                                                        |
| <sup>¶</sup> Female                 | 0                                                          | 1                                                      | 0                                                          | 1                                                      |
| Male                                | -0.56 (-0.65, -0.48)                                       | 1.045 (1.044 to 1.046)                                 | -0.56 (-0.65, -0.48)                                       | 1.045 (1.044 to 1.046)                                 |
| <b>Birth rank</b>                   |                                                            |                                                        |                                                            |                                                        |
| 1 <sup>¶</sup>                      | 0                                                          | 1                                                      | 0                                                          | 1                                                      |
| 2                                   | -0.39 (-0.49, -0.29)                                       | 1.038 (1.037, 1.039)                                   | -0.39 (-0.49, -0.29)                                       | 1.038 (1.037, 1.039)                                   |
| 3                                   | -0.37 (-0.52, -0.22)                                       | 1.050 (1.048, 1.051)                                   | -0.37 (-0.52, -0.22)                                       | 1.050 (1.048, 1.051)                                   |
| ≥ 4                                 | -0.24 (-0.50, 0.02)                                        | 1.058 (1.056, 1.061)                                   | -0.24 (-0.49, 0.02)                                        | 1.058 (1.056, 1.061)                                   |
| <b>Age mother (yrs)<sup>‡</sup></b> |                                                            |                                                        |                                                            |                                                        |
| < 20 (per 5 yrs decr.)              | -4.10 (-5.59, -2.61)                                       | 1.002 (0.987, 1.017)                                   | -4.10 (-5.59, -2.61)                                       | 1.002 (0.987, 1.017)                                   |
| 20 - <30 <sup>¶</sup>               | 0                                                          | 1                                                      | 0                                                          | 1                                                      |
| ≥ 30-40 (per 5 yrs)                 | -0.99 (-1.06, -0.91)                                       | 1.000 (1.000, 1.001)                                   | -0.99 (-1.07, -0.92)                                       | 1.000 (1.000, 1.001)                                   |
| ≥ 40 (per 5 yrs)                    | -2.93 (-3.36, -2.50)                                       | 0.998 (0.994, 1.003)                                   | -2.92 (-3.35, -2.50)                                       | 0.998 (0.994, 1.003)                                   |
| <b>Civil status<sup>§</sup></b>     |                                                            |                                                        |                                                            |                                                        |
| Married                             | 0                                                          | 1                                                      | 0                                                          | 1                                                      |
| Not married                         | -0.01 (-0.13, 0.10)                                        | 0.990 (0.989, 0.991)                                   | -0.01 (-0.13, 0.10)                                        | 0.990 (0.989, 0.991)                                   |
| <b>Nationality mother</b>           |                                                            |                                                        |                                                            |                                                        |
| Switzerland <sup>¶</sup>            | 0                                                          | 1                                                      | 0                                                          | 1                                                      |
| S Europe                            | 0.20 (-0.01, 0.40)                                         | 0.994 (0.992, 0.996)                                   | 0.20 (0.00, 0.41)                                          | 0.994 (0.992, 0.996)                                   |
| W Europe                            | 0.20 (0.02, 0.38)                                          | 1.008 (1.006, 1.010)                                   | 0.20 (0.02, 0.37)                                          | 1.008 (1.006, 1.010)                                   |
| N Europe                            | 0.37 (-0.07, 0.81)                                         | 1.025 (1.020, 1.029)                                   | 0.36 (-0.08, 0.80)                                         | 1.025 (1.020, 1.029)                                   |
| E Europe                            | 0.21 (0.04, 0.38)                                          | 1.013 (1.011, 1.014)                                   | 0.22 (0.05, 0.39)                                          | 1.013 (1.011, 1.015)                                   |
| Other                               | -0.32 (-0.49, -0.14)                                       | 1.007 (1.005, 1.008)                                   | -0.31 (-0.48, -0.14)                                       | 1.007 (1.005, 1.008)                                   |
| <b>Nationality father</b>           |                                                            |                                                        |                                                            |                                                        |
| Switzerland <sup>¶</sup>            | 0                                                          | 1                                                      | 0                                                          | 1                                                      |
| S Europe                            | -0.46 (-0.64, -0.28)                                       | 0.991 (0.990, 0.993)                                   | -0.45 (-0.63, -0.27)                                       | 0.992 (0.99, 0.993)                                    |
| W Europe                            | 0.07 (-0.11, 0.25)                                         | 1.008 (1.006, 1.009)                                   | 0.07 (-0.11, 0.25)                                         | 1.008 (1.006, 1.009)                                   |
| N Europe                            | 0.51 (0.08, 0.94)                                          | 1.013 (1.009, 1.017)                                   | 0.50 (0.07, 0.93)                                          | 1.013 (1.009, 1.017)                                   |
| E Europe                            | -0.46 (-0.64, -0.28)                                       | 1.009 (1.007, 1.010)                                   | -0.45 (-0.63, -0.27)                                       | 1.009 (1.007, 1.011)                                   |
| Other                               | -0.02 (-0.22, 0.18)                                        | 0.992 (0.991, 0.994)                                   | -0.01 (-0.21, 0.19)                                        | 0.993 (0.991, 0.995)                                   |
| missing                             | -3.87 (-4.24, -3.50)                                       | 0.989 (0.985, 0.992)                                   | -3.86 (-4.23, -3.49)                                       | 0.989 (0.985, 0.993)                                   |
| <b>SEP index</b>                    |                                                            |                                                        |                                                            |                                                        |
| 1st quintile                        | -                                                          | -                                                      | -0.08 (-0.25, 0.08)                                        | 0.997 (0.996, 0.999)                                   |
| 2nd quintile                        | -                                                          | -                                                      | -0.09 (-0.24, 0.06)                                        | 0.998 (0.997, 1.000)                                   |
| 3rd quintile                        | -                                                          | -                                                      | -0.02 (-0.17, 0.13)                                        | 0.998 (0.997, 0.999)                                   |
| 4th quintile                        | -                                                          | -                                                      | 0.02 (-0.12, 0.17)                                         | 1.000 (0.999, 1.002)                                   |
| 5th quintile <sup>¶</sup>           | -                                                          | -                                                      | 0                                                          | 1                                                      |
| <b>Altitude (m)</b>                 |                                                            |                                                        |                                                            |                                                        |
| 500 <sup>¶</sup>                    | 0                                                          | 1                                                      | 0                                                          | 1                                                      |
| per 500 m increase                  | 0.07 (-0.09, 0.23)                                         | 0.989 (0.988, 0.991)                                   | 0.08 (-0.08, 0.23)                                         | 0.989 (0.988, 0.991)                                   |
| <b>Urbanization</b>                 |                                                            |                                                        |                                                            |                                                        |
| Urban <sup>¶</sup>                  | 0                                                          | 1                                                      | 0                                                          | 1                                                      |
| Peri-urban                          | -0.43 (-0.57, -0.28)                                       | 1.001 (1.000, 1.002)                                   | -0.43 (-0.57, -0.28)                                       | 1.001 (1.000, 1.002)                                   |
| Rural                               | -0.15 (-0.32, 0.02)                                        | 1.000 (0.998, 1.001)                                   | -0.13 (-0.30, 0.04)                                        | 1.001 (0.999, 1.002)                                   |
| <b>Language region</b>              |                                                            |                                                        |                                                            |                                                        |
| German <sup>¶</sup>                 | 0                                                          | 1                                                      | 0                                                          | 1                                                      |
| French                              | -0.62 (-0.77, -0.47)                                       | 0.989 (0.987, 0.990)                                   | -0.61 (-0.76, -0.46)                                       | 0.989 (0.987, 0.990)                                   |
| Italian                             | -0.94 (-1.26, -0.63)                                       | 0.982 (0.980, 0.985)                                   | -0.93 (-1.24, -0.61)                                       | 0.982 (0.980, 0.985)                                   |
| <b>% variation explained</b>        |                                                            |                                                        |                                                            |                                                        |
| Full model                          | 31%                                                        | 87%                                                    | 31%                                                        | 88%                                                    |
| Model without Lang. region          | 14%                                                        | 66%                                                    | 15%                                                        | 68%                                                    |

\*Birth weight was modelled on a log scale, which results in multiplicative effects. The model for birth weight was additionally adjusted for gestational age by a cubic spline function with knots at weeks 25, 30 and 35.

<sup>&</sup> In the model for BW, the intercept corresponds to an estimated mean birth weight (g) for a singleton girl born at gestational age 40 weeks as the first child (rank 1) in a German-speaking, urban region of elevation 500m, whose mother is 20-30 years old at birth and married, and both parents have Swiss nationality and tertiary education.

<sup>¶</sup> Reference category

<sup>‡</sup> Age modelled by a piece-wise linear function: constant at reference range ≥20-30, and separate slopes for age <20, ≥30-40, and ≥40.

<sup>§</sup> Married or in registered partnership / Not married: Single, widow, divorced or in dissolved partnership

<sup>¶</sup> Percentage of regional variance explained by model predictors, i.e. percent reduction in variance of random effects ( $\sigma^2$ ) when compared to model with no predictors (model 0).

Supplementary Figure S1. Selection of eligible and complete case study populations among live births in Switzerland 2011 to 2014.

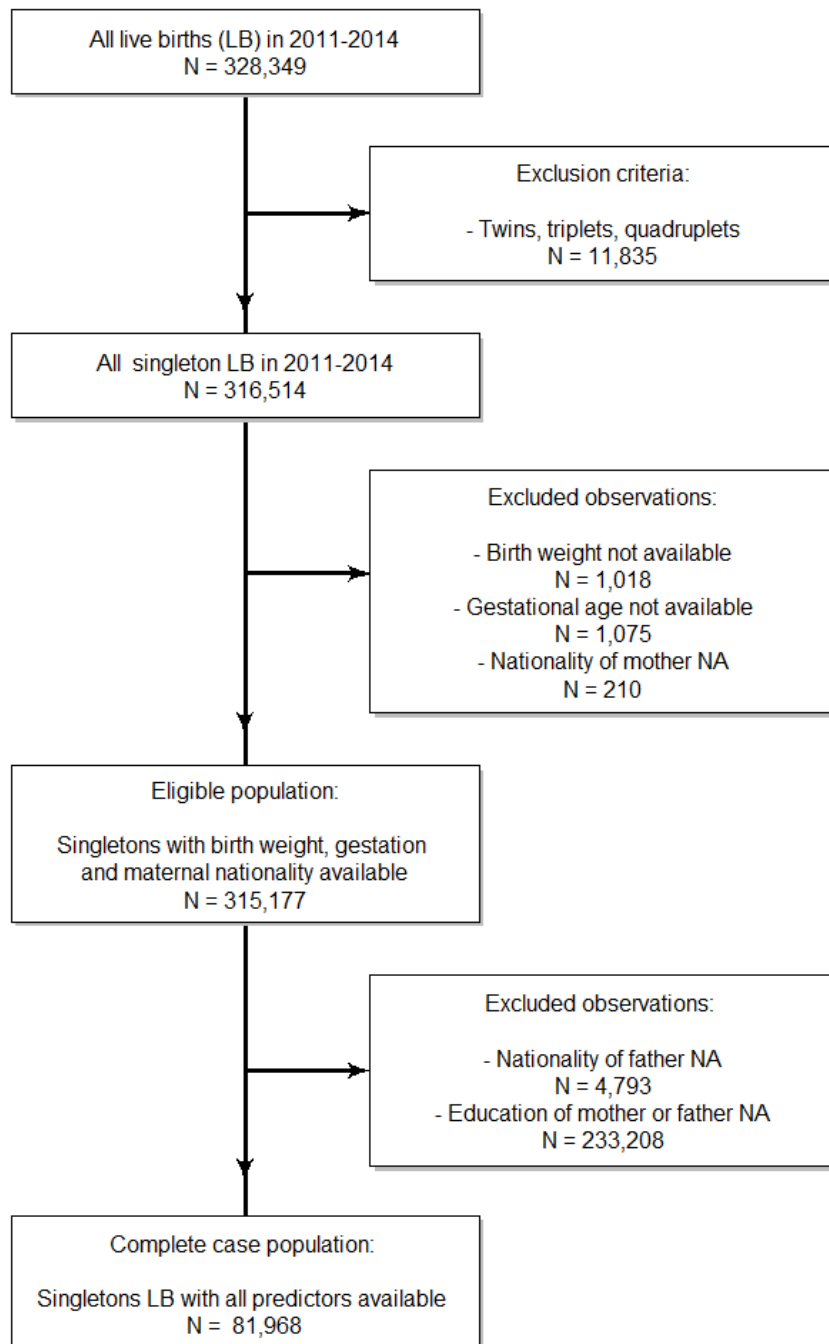

1  
2  
3  
4  
5  
6  
7  
8  
9  
10  
11  
12  
13  
14  
15  
16  
17  
18  
19  
20  
21  
22  
23  
24  
25  
26  
27  
28  
29  
30  
31  
32  
33  
34  
35  
36  
37  
38  
39  
40  
41  
42  
43  
44  
45  
46  
47  
48  
49  
50  
51  
52  
53  
54  
55  
56  
57  
58  
59  
60

**Supplementary Figure S2. Relationship between birth weight and gestational age at birth modelled by a cubic spline function. Separate fitted curves are shown for newborn girls and boys, with all other predictors corresponding to the reference categories shown in Table 2.**

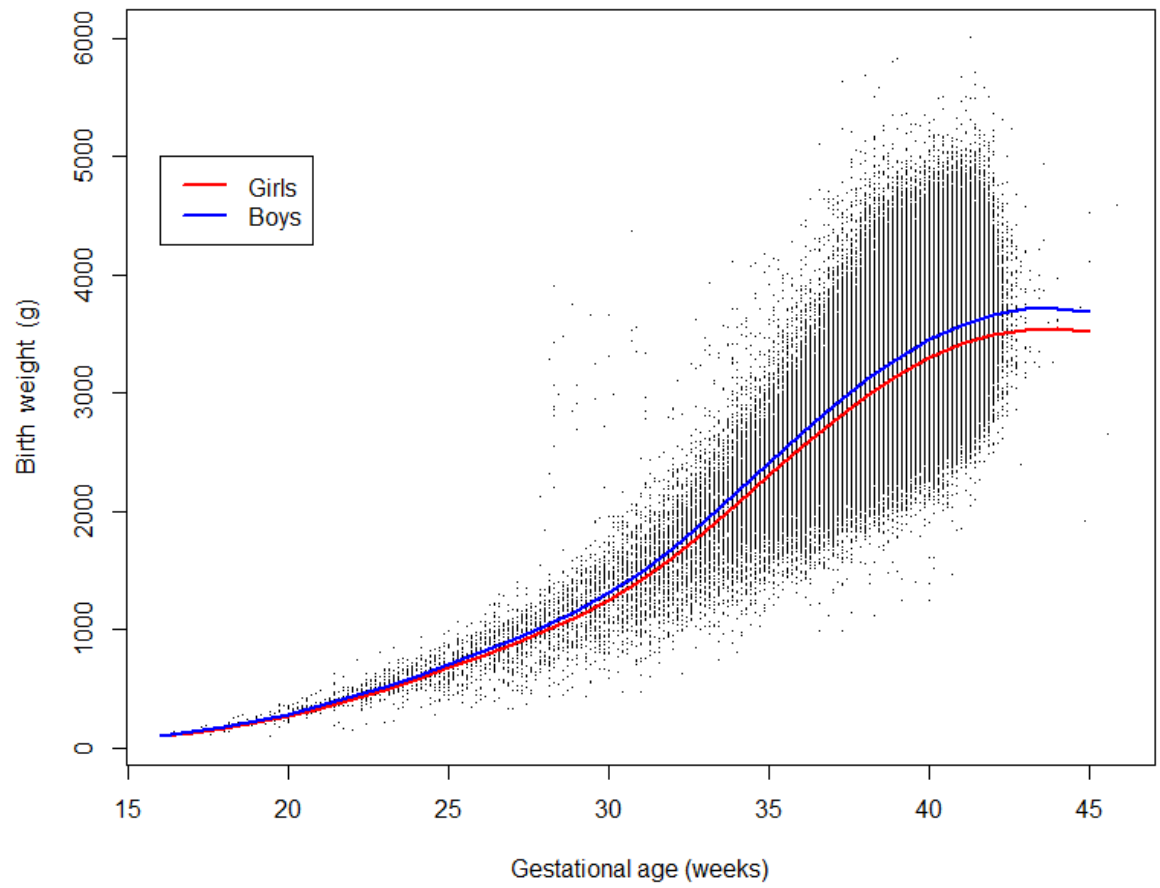

Supplementary Figure S3. Relationship between mean gestational age and proportion of preterm live births (<37 weeks) among eligible live births across 705 regions (upper panel) and between mean birth weight and proportion of low birth weight births (<2500g) (lower panel). Results from linear regression weighted by the number of live births in each region. Prediction intervals displayed for an average-size region (n=447). GA = gestational age; BW= birth weight; 276 days correspond to 39<sup>3/7</sup> weeks.

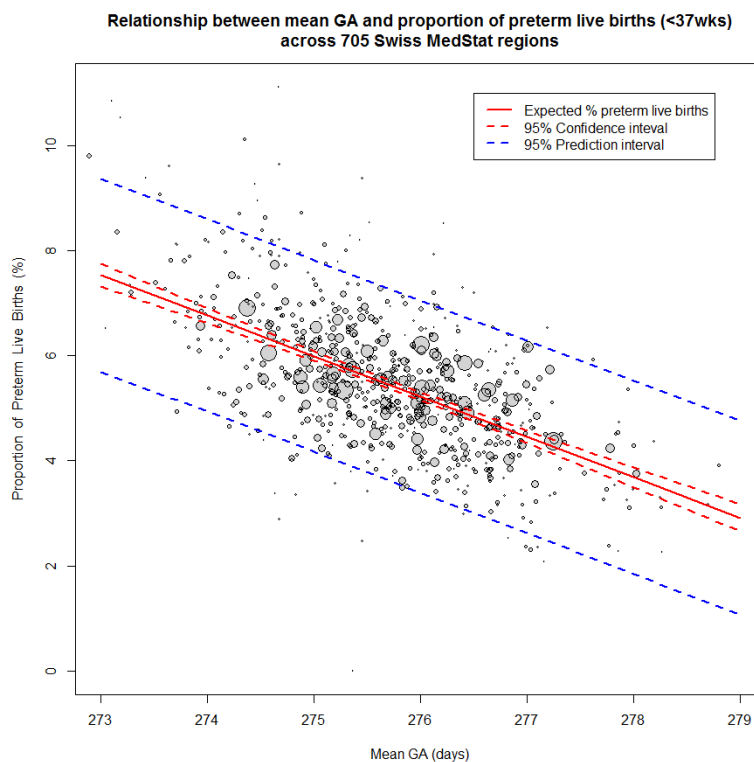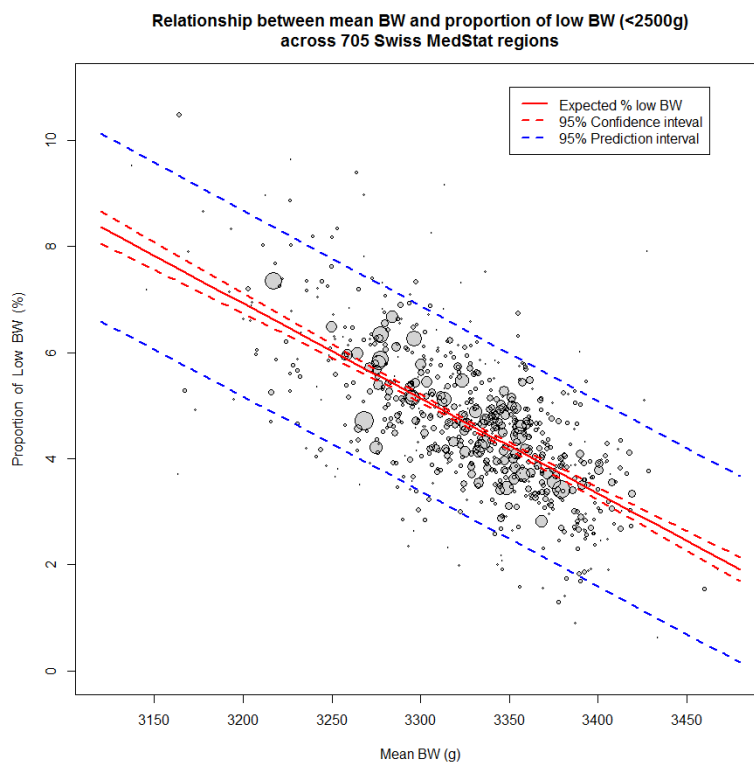

## STROBE Statement—checklist of items that should be included in reports of observational studies

|                              | Item No | Recommendation                                                                                                                                                                                                                                                                                                                                                                                                                                                         | Page No |
|------------------------------|---------|------------------------------------------------------------------------------------------------------------------------------------------------------------------------------------------------------------------------------------------------------------------------------------------------------------------------------------------------------------------------------------------------------------------------------------------------------------------------|---------|
| <b>Title and abstract</b>    | 1       | (a) Indicate the study's design with a commonly used term in the title or the abstract                                                                                                                                                                                                                                                                                                                                                                                 | 1       |
|                              |         | (b) Provide in the abstract an informative and balanced summary of what was done and what was found                                                                                                                                                                                                                                                                                                                                                                    | 2       |
| <b>Introduction</b>          |         |                                                                                                                                                                                                                                                                                                                                                                                                                                                                        |         |
| Background/rationale         | 2       | Explain the scientific background and rationale for the investigation being reported                                                                                                                                                                                                                                                                                                                                                                                   | 4       |
| Objectives                   | 3       | State specific objectives, including any prespecified hypotheses                                                                                                                                                                                                                                                                                                                                                                                                       | 4       |
| <b>Methods</b>               |         |                                                                                                                                                                                                                                                                                                                                                                                                                                                                        |         |
| Study design                 | 4       | Present key elements of study design early in the paper                                                                                                                                                                                                                                                                                                                                                                                                                | 5       |
| Setting                      | 5       | Describe the setting, locations, and relevant dates, including periods of recruitment, exposure, follow-up, and data collection                                                                                                                                                                                                                                                                                                                                        | 6       |
| Participants                 | 6       | (a) <i>Cohort study</i> —Give the eligibility criteria, and the sources and methods of selection of participants. Describe methods of follow-up<br><i>Case-control study</i> —Give the eligibility criteria, and the sources and methods of case ascertainment and control selection. Give the rationale for the choice of cases and controls<br><i>Cross-sectional study</i> —Give the eligibility criteria, and the sources and methods of selection of participants | 6       |
|                              |         | (b) <i>Cohort study</i> —For matched studies, give matching criteria and number of exposed and unexposed<br><i>Case-control study</i> —For matched studies, give matching criteria and the number of controls per case                                                                                                                                                                                                                                                 |         |
| Variables                    | 7       | Clearly define all outcomes, exposures, predictors, potential confounders, and effect modifiers. Give diagnostic criteria, if applicable                                                                                                                                                                                                                                                                                                                               | 5       |
| Data sources/<br>measurement | 8*      | For each variable of interest, give sources of data and details of methods of assessment (measurement). Describe comparability of assessment methods if there is more than one group                                                                                                                                                                                                                                                                                   | 5       |
| Bias                         | 9       | Describe any efforts to address potential sources of bias                                                                                                                                                                                                                                                                                                                                                                                                              | 7       |
| Study size                   | 10      | Explain how the study size was arrived at                                                                                                                                                                                                                                                                                                                                                                                                                              | 8       |
| Quantitative variables       | 11      | Explain how quantitative variables were handled in the analyses. If applicable, describe which groupings were chosen and why                                                                                                                                                                                                                                                                                                                                           | 6       |
| Statistical methods          | 12      | (a) Describe all statistical methods, including those used to control for confounding                                                                                                                                                                                                                                                                                                                                                                                  | 6       |
|                              |         | (b) Describe any methods used to examine subgroups and interactions                                                                                                                                                                                                                                                                                                                                                                                                    | na      |
|                              |         | (c) Explain how missing data were addressed                                                                                                                                                                                                                                                                                                                                                                                                                            | 8       |
|                              |         | (d) <i>Cohort study</i> —If applicable, explain how loss to follow-up was addressed<br><i>Case-control study</i> —If applicable, explain how matching of cases and controls was addressed<br><i>Cross-sectional study</i> —If applicable, describe analytical methods taking account of sampling strategy                                                                                                                                                              | na      |
|                              |         | (e) Describe any sensitivity analyses                                                                                                                                                                                                                                                                                                                                                                                                                                  | 7       |

Continued on next page

| <b>Results</b>           |     |                                                                                                                                                                                                              |                   |
|--------------------------|-----|--------------------------------------------------------------------------------------------------------------------------------------------------------------------------------------------------------------|-------------------|
| Participants             | 13* | (a) Report numbers of individuals at each stage of study—eg numbers potentially eligible, examined for eligibility, confirmed eligible, included in the study, completing follow-up, and analysed            | 8                 |
|                          |     | (b) Give reasons for non-participation at each stage                                                                                                                                                         | 8                 |
|                          |     | (c) Consider use of a flow diagram                                                                                                                                                                           | Figure S1         |
| Descriptive data         | 14* | (a) Give characteristics of study participants (eg demographic, clinical, social) and information on exposures and potential confounders                                                                     | Table 1, Table S1 |
|                          |     | (b) Indicate number of participants with missing data for each variable of interest                                                                                                                          | Table 1           |
|                          |     | (c) <i>Cohort study</i> —Summarise follow-up time (eg, average and total amount)                                                                                                                             |                   |
| Outcome data             | 15* | <i>Cohort study</i> —Report numbers of outcome events or summary measures over time                                                                                                                          |                   |
|                          |     | <i>Case-control study</i> —Report numbers in each exposure category, or summary measures of exposure                                                                                                         |                   |
|                          |     | <i>Cross-sectional study</i> —Report numbers of outcome events or summary measures                                                                                                                           | Table 1           |
| Main results             | 16  | (a) Give unadjusted estimates and, if applicable, confounder-adjusted estimates and their precision (eg, 95% confidence interval). Make clear which confounders were adjusted for and why they were included | Table 2, Table S3 |
|                          |     | (b) Report category boundaries when continuous variables were categorized                                                                                                                                    | All tables        |
|                          |     | (c) If relevant, consider translating estimates of relative risk into absolute risk for a meaningful time period                                                                                             | na                |
| Other analyses           | 17  | Report other analyses done—eg analyses of subgroups and interactions, and sensitivity analyses                                                                                                               | Table S2, S3      |
| <b>Discussion</b>        |     |                                                                                                                                                                                                              |                   |
| Key results              | 18  | Summarise key results with reference to study objectives                                                                                                                                                     | 11                |
| Limitations              | 19  | Discuss limitations of the study, taking into account sources of potential bias or imprecision. Discuss both direction and magnitude of any potential bias                                                   | 12                |
| Interpretation           | 20  | Give a cautious overall interpretation of results considering objectives, limitations, multiplicity of analyses, results from similar studies, and other relevant evidence                                   | 12                |
| Generalisability         | 21  | Discuss the generalisability (external validity) of the study results                                                                                                                                        | 12                |
| <b>Other information</b> |     |                                                                                                                                                                                                              |                   |
| Funding                  | 22  | Give the source of funding and the role of the funders for the present study and, if applicable, for the original study on which the present article is based                                                | 29                |

\*Give information separately for cases and controls in case-control studies and, if applicable, for exposed and unexposed groups in cohort and cross-sectional studies.

**Note:** An Explanation and Elaboration article discusses each checklist item and gives methodological background and published examples of transparent reporting. The STROBE checklist is best used in conjunction with this article (freely available on the Web sites of PLoS Medicine at <http://www.plosmedicine.org/>, Annals of Internal Medicine at

1  
2 <http://www.annals.org/>, and *Epidemiology* at <http://www.epidem.com/>). Information on the STROBE Initiative is  
3 available at [www.strobe-statement.org](http://www.strobe-statement.org).  
4  
5  
6  
7  
8  
9  
10  
11  
12  
13  
14  
15  
16  
17  
18  
19  
20  
21  
22  
23  
24  
25  
26  
27  
28  
29  
30  
31  
32  
33  
34  
35  
36  
37  
38  
39  
40  
41  
42  
43  
44  
45  
46  
47  
48  
49  
50  
51  
52  
53  
54  
55  
56  
57  
58  
59  
60

For peer review only
